# Supplementary material for: Discovery of SARS-CoV-2 main protease inhibitors using a synthesis-directed de novo design model
Source: Royal Society of Chemistry journal article supplement (doi:10.1039/d1cc00050k), 2021-01-01

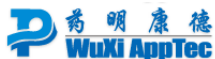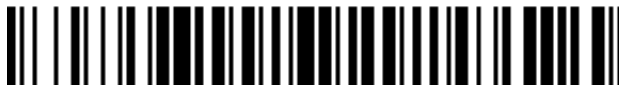

|                     |                                       |
|---------------------|---------------------------------------|
| Document Number:    | EB2224-83B                            |
| Title:              | EB2224-83-P1B1.pdf                    |
| Chemist:            | ZHOU,PENG                             |
| Created Date:       | Aug.20.2020                           |
| Last Modified Date: | Aug.21.2020                           |
| Witness:            | Witnessed by CHEN, HUI on Aug.21.2020 |
| Print Date:         | Nov.09.2020                           |
| Copyright:          | WuXi AppTec                           |
| Classifications:    | Confidential, Vital Integrity         |

[EB2224-83B] EB2224-83-P1B1.pdf

3

# LCMS REPORT

Print time : 08/20/2020 18:01:57  
Compound ID : 1  
Sample ID : EB2224-83-P1B1  
Injection Date : 2020/8/20 18:00:48  
Injection Vol : 6ul  
Location : tray1 vail40  
Acq Method : 5-95AB\_1min\_220&254\_Shimadzu.lcm  
Org Data File : D:\DATA\2020\2008\200820\EB2224-83-P1B1.lcd  
Instrument & column: LCMS\_05 1-2402  
AB method: Chromolith @ Flash RP-18e, 25-3mm  
CD method: Xbridge shield RP 18, 5um, 2.1\*50mm

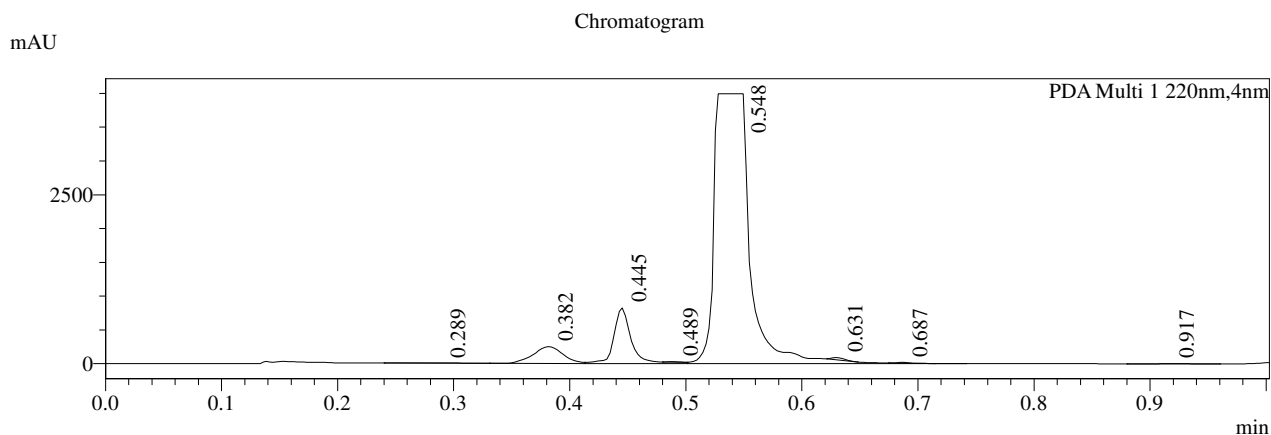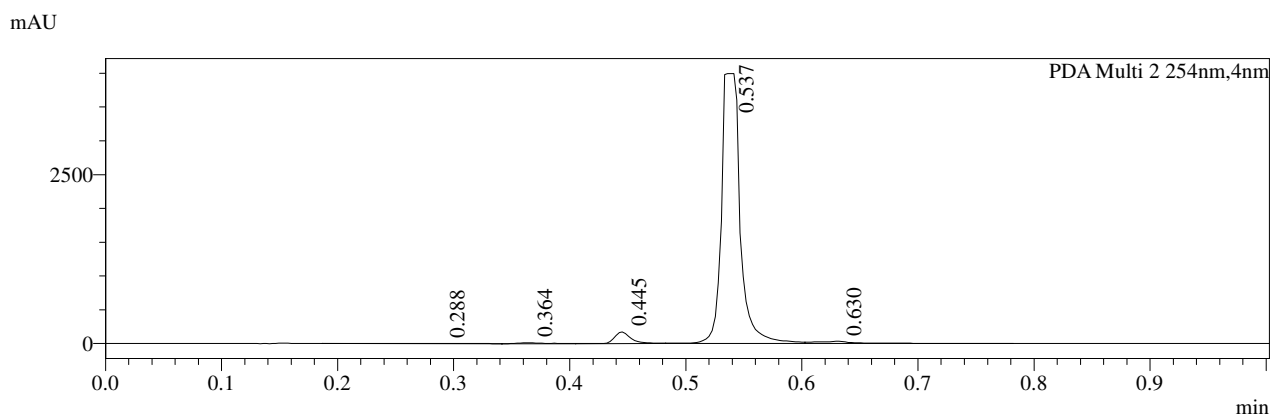

- 1 PDA Multi 1 / 220nm, 4nm
- 2 PDA Multi 2 / 254nm, 4nm

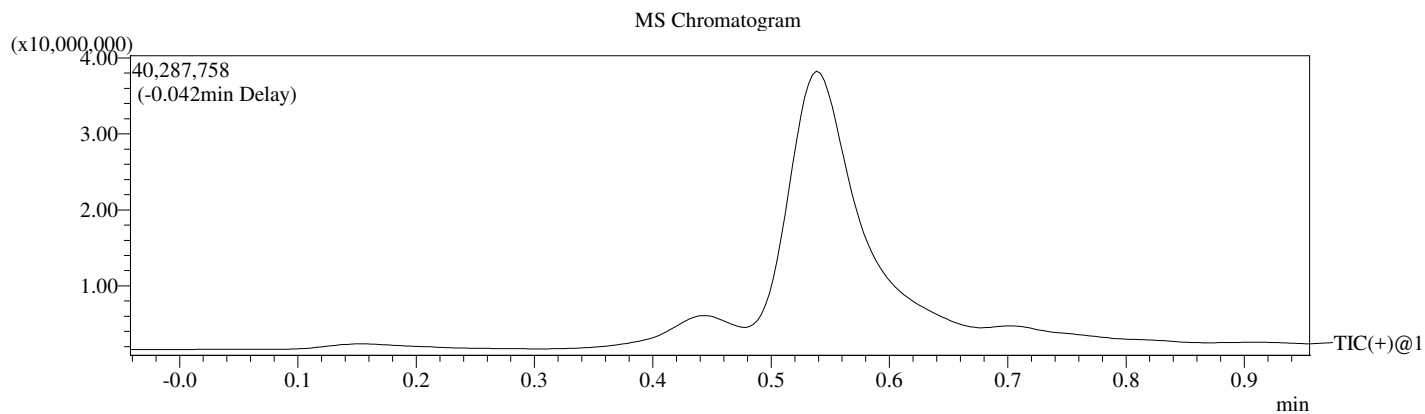

Integration Result

# Peak Table

PDA Ch1 220nm

| Peak# | Ret. Time | Height  | Height% | USP Width | Area    | Area%  |
|-------|-----------|---------|---------|-----------|---------|--------|
| 1     | 0.289     | 5020    | 0.098   | 0.073     | 12222   | 0.125  |
| 2     | 0.382     | 248806  | 4.861   | 0.052     | 447313  | 4.571  |
| 3     | 0.445     | 821575  | 16.050  | 0.028     | 850010  | 8.686  |
| 4     | 0.489     | 5753    | 0.112   | 0.021     | 3654    | 0.037  |
| 5     | 0.548     | 3989803 | 77.943  | 0.040     | 8439220 | 86.236 |
| 6     | 0.631     | 33455   | 0.654   | 0.023     | 21241   | 0.217  |
| 7     | 0.687     | 13580   | 0.265   | 0.023     | 10331   | 0.106  |
| 8     | 0.917     | 854     | 0.017   | 0.073     | 2193    | 0.022  |

PDA Ch2 254nm

| Peak# | Ret. Time | Height  | Height% | USP Width | Area    | Area%  |
|-------|-----------|---------|---------|-----------|---------|--------|
| 1     | 0.288     | 3222    | 0.076   | 0.143     | 16983   | 0.353  |
| 2     | 0.364     | 13249   | 0.314   | 0.039     | 20134   | 0.418  |
| 3     | 0.445     | 173176  | 4.108   | 0.029     | 171896  | 3.569  |
| 4     | 0.537     | 3992825 | 94.710  | 0.029     | 4527750 | 94.001 |
| 5     | 0.630     | 33354   | 0.791   | 0.089     | 79965   | 1.660  |

Operator:\_\_\_\_\_

Date:\_\_\_\_\_

# Mass Spectrum

RefTime: 0.382 Datafile: D:\DATA\2020\2008\200820\EB2224-83-P1B1.lcd

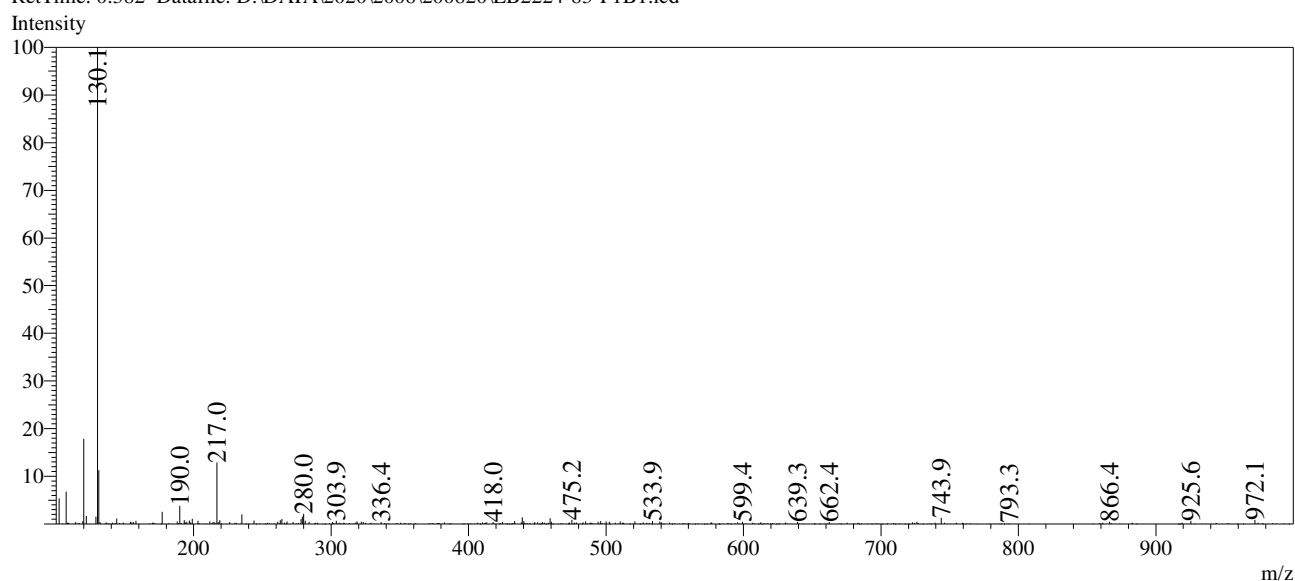

RefTime: 0.445 Datafile: D:\DATA\2020\2008\200820\EB2224-83-P1B1.lcd

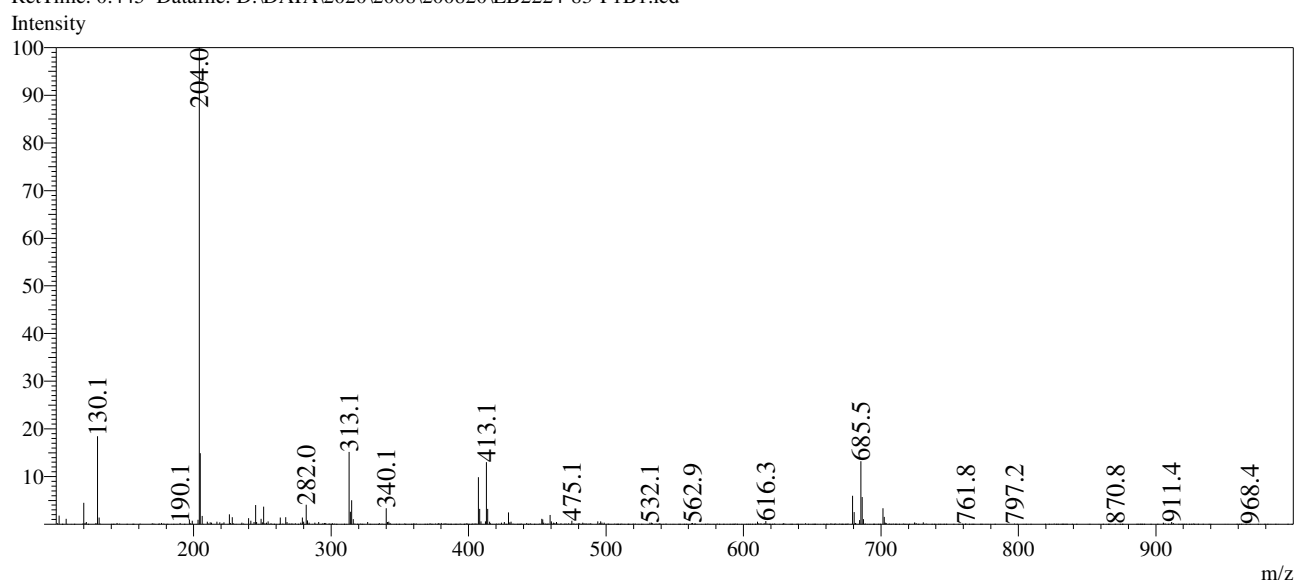

RefTime: 0.548 Datafile: D:\DATA\2020\2008\200820\EB2224-83-P1B1.lcd

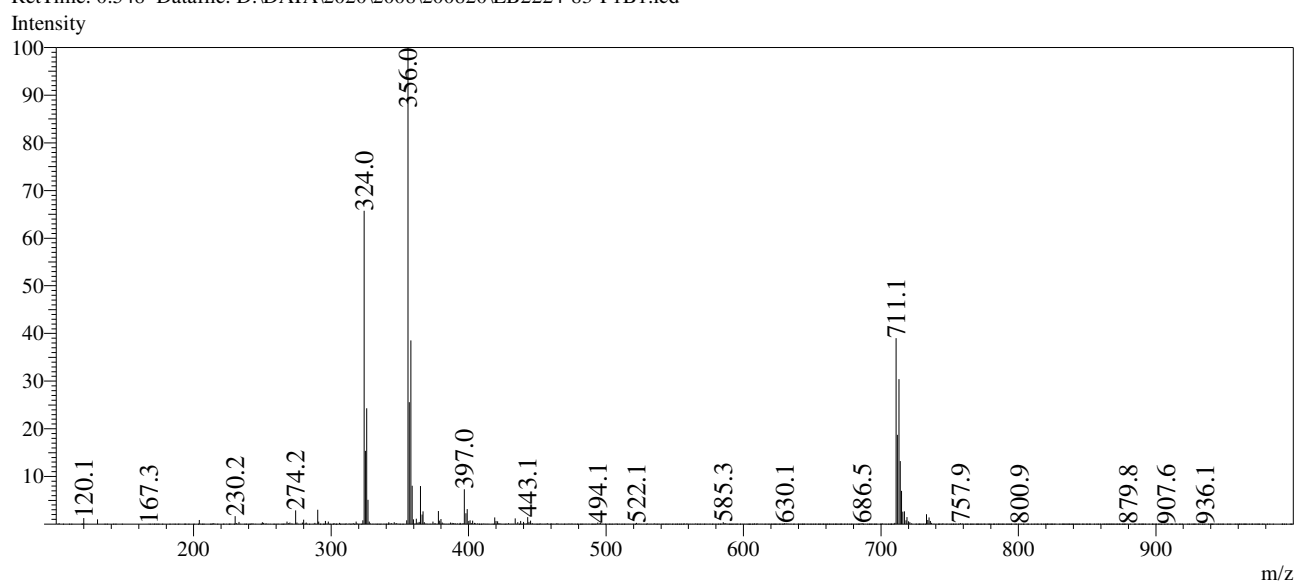

Supplement: d1cc00050k1.zip [file LC-MS_intermediate3.pdf › new_ESI/spectroscopic_data/compound2/LC-MS_intermediate3.pdf]
