# Supplementary material for: Discovery of SARS-CoV-2 main protease inhibitors using a synthesis-directed de novo design model
Source: Royal Society of Chemistry journal article supplement (doi:10.1039/d1cc00050k), 2021-01-01

CompoundID: ALP-POS-ddb41b15-1

EB1773-69-P1A3 CDCl<sub>3</sub> Bruker\_NT-C\_400MHz

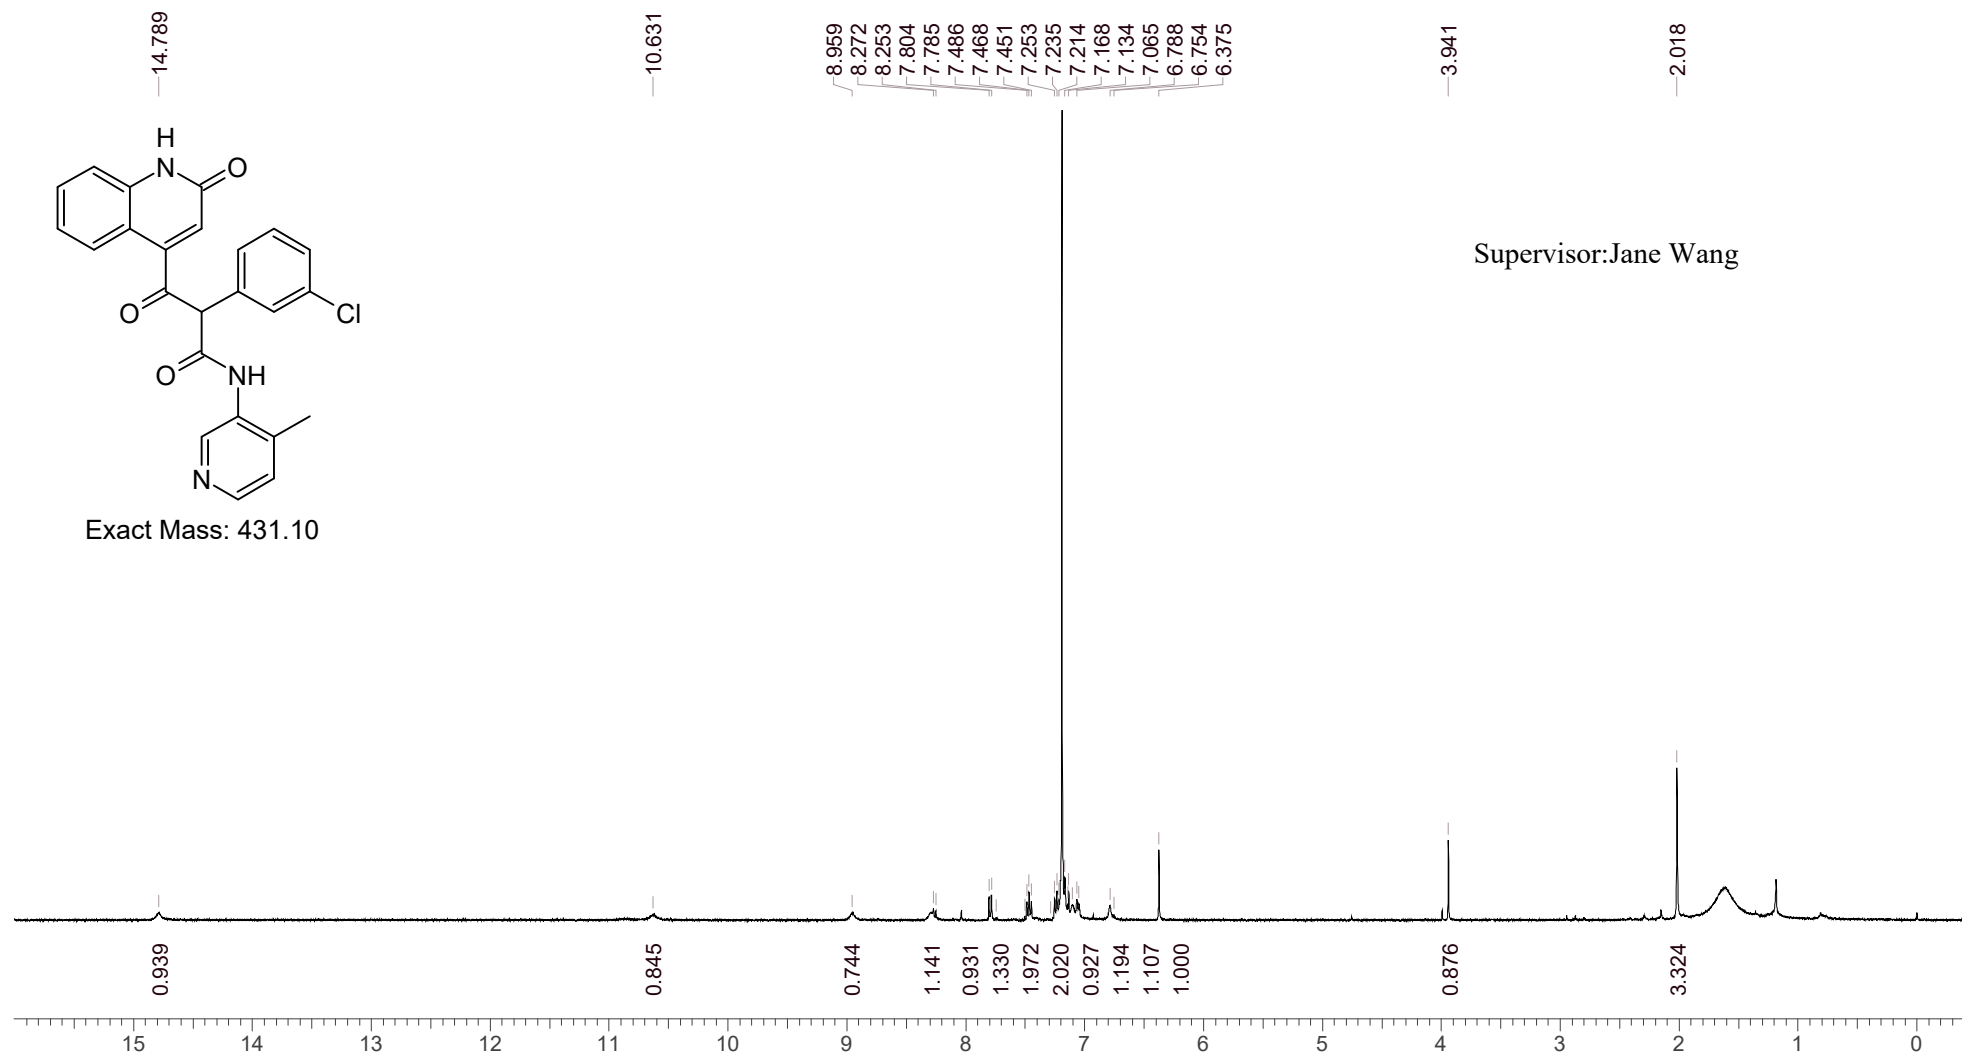

Confidential. For research only Not for regulatory filing

Operator:

Date:

# LCMS REPORT

Print time : 09/24/2020 15:45:09

Compound ID : 1  
Sample ID : EB1773-69-P1G  
Injection Date : 2020/9/24 15:40:46  
Injection Vol : 4ul  
Location : tray1 vail97  
Acq Method : D:\method\10-80AB\_4min\_E\_Shimadzu.lcm  
Org DataFile : D:\DATA\2020\2009\200924\EB1773-69-P1G.lcd  
Instrument & column: LCMS-SAP 1-2402  
Xtimate C18, 3um,2.1\*30mm

Chromatogram

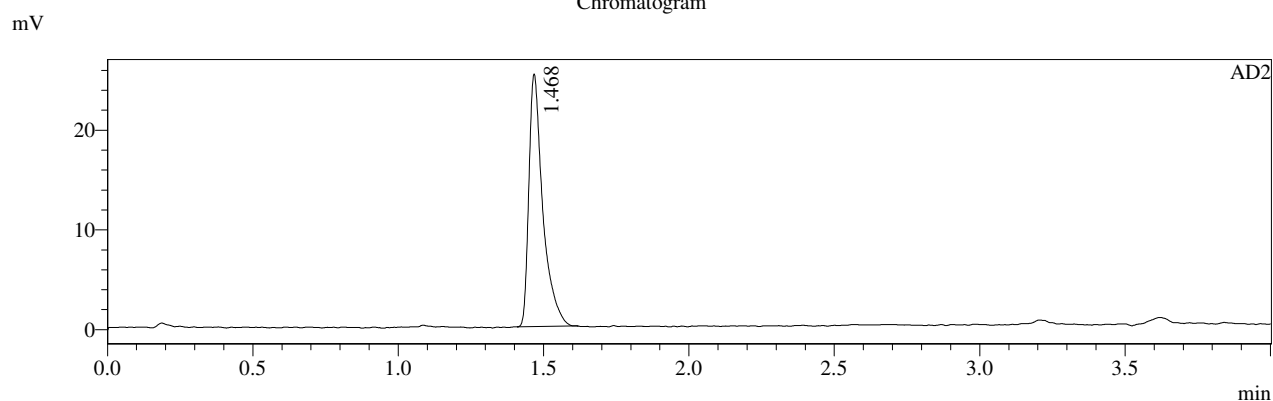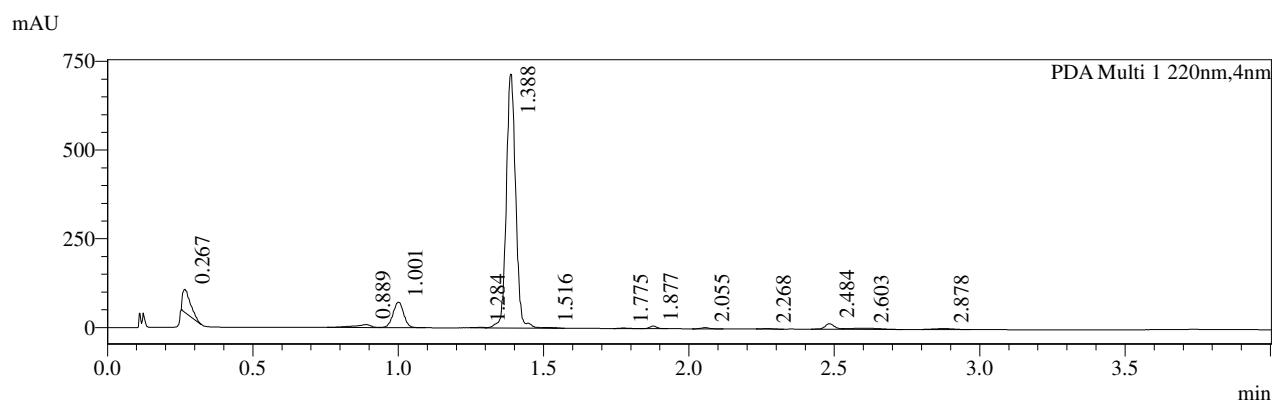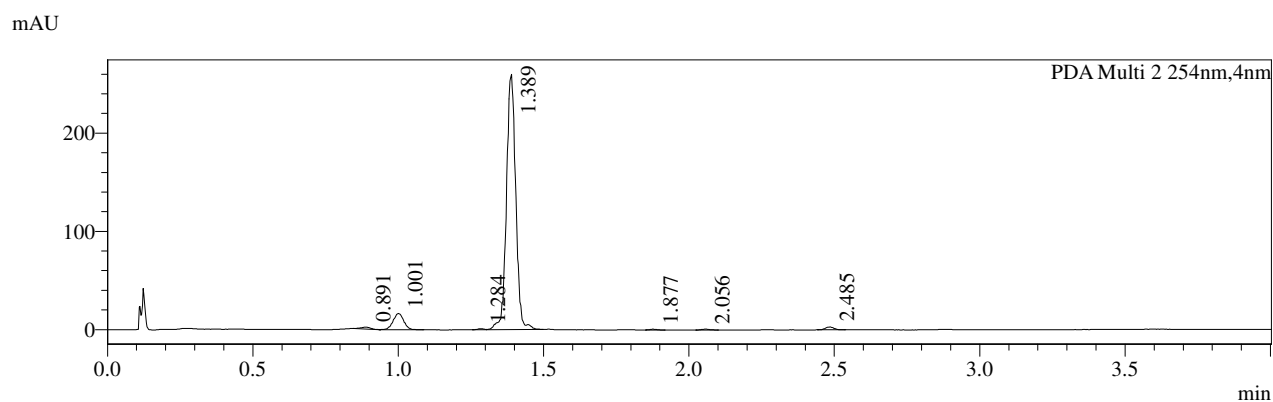

- 1 AD2 /
- 2 PDA Multi 1 / 220nm,4nm
- 3 PDA Multi 2 / 254nm,4nm

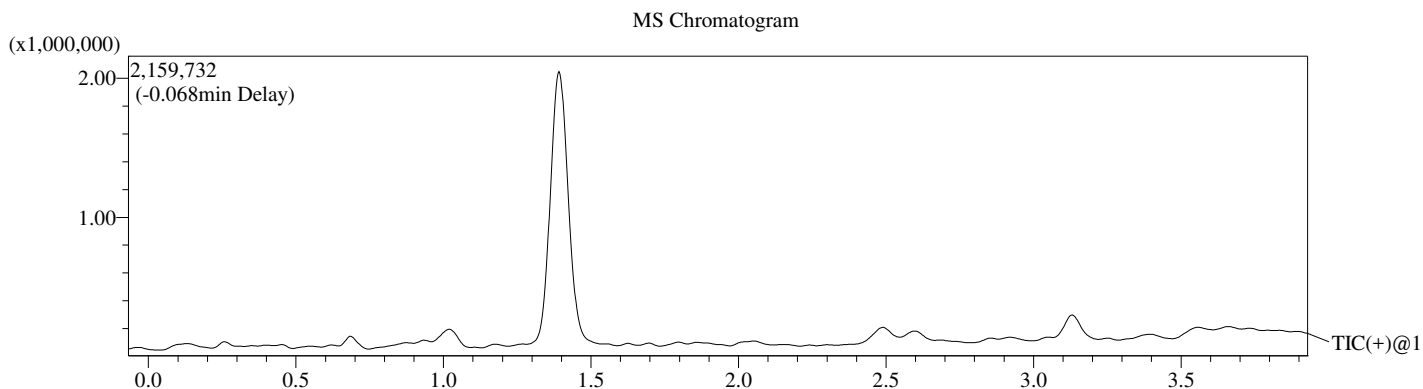

Integration Result

Peak Table

AD2

| Peak# | Ret. Time | Height | Height% | USP Width | Area  | Area%   |
|-------|-----------|--------|---------|-----------|-------|---------|
| 1     | 1.468     | 25272  | 100.000 | 0.082     | 84353 | 100.000 |

PDA Ch1 220nm

| Peak# | Ret. Time | Height | Height% | USP Width | Area    | Area%  |
|-------|-----------|--------|---------|-----------|---------|--------|
| 1     | 0.267     | 65118  | 7.246   | 0.057     | 122036  | 6.007  |
| 2     | 0.889     | 8443   | 0.939   | 0.088     | 34746   | 1.710  |
| 3     | 1.001     | 72467  | 8.064   | 0.070     | 184732  | 9.093  |
| 4     | 1.284     | 1775   | 0.197   | 0.051     | 2937    | 0.145  |
| 5     | 1.388     | 715571 | 79.625  | 0.060     | 1592783 | 78.405 |
| 6     | 1.516     | 839    | 0.093   | 0.041     | 1009    | 0.050  |
| 7     | 1.775     | 1360   | 0.151   | 0.062     | 3038    | 0.150  |
| 8     | 1.877     | 7375   | 0.821   | 0.049     | 12385   | 0.610  |
| 9     | 2.055     | 3325   | 0.370   | 0.057     | 6563    | 0.323  |
| 10    | 2.268     | 1149   | 0.128   | 0.067     | 2824    | 0.139  |
| 11    | 2.484     | 15667  | 1.743   | 0.059     | 35259   | 1.736  |
| 12    | 2.603     | 3089   | 0.344   | 0.207     | 21772   | 1.072  |
| 13    | 2.878     | 2505   | 0.279   | 0.127     | 11406   | 0.561  |

PDA Ch2 254nm

| Peak# | Ret. Time | Height | Height% | USP Width | Area   | Area%  |
|-------|-----------|--------|---------|-----------|--------|--------|
| 1     | 0.891     | 2037   | 0.717   | 0.061     | 4258   | 0.673  |
| 2     | 1.001     | 16443  | 5.790   | 0.070     | 41907  | 6.620  |
| 3     | 1.284     | 932    | 0.328   | 0.046     | 1499   | 0.237  |
| 4     | 1.389     | 259916 | 91.519  | 0.061     | 576244 | 91.030 |
| 5     | 1.877     | 796    | 0.280   | 0.048     | 1302   | 0.206  |
| 6     | 2.056     | 936    | 0.330   | 0.056     | 1799   | 0.284  |
| 7     | 2.485     | 2942   | 1.036   | 0.056     | 6019   | 0.951  |

Operator: \_\_\_\_\_

Date: \_\_\_\_\_

# Mass Spectrum

RefTime: 0.265 Datafile: D:\DATA\2020\2009\200924\EB1773-69-P1G.lcd

Intensity

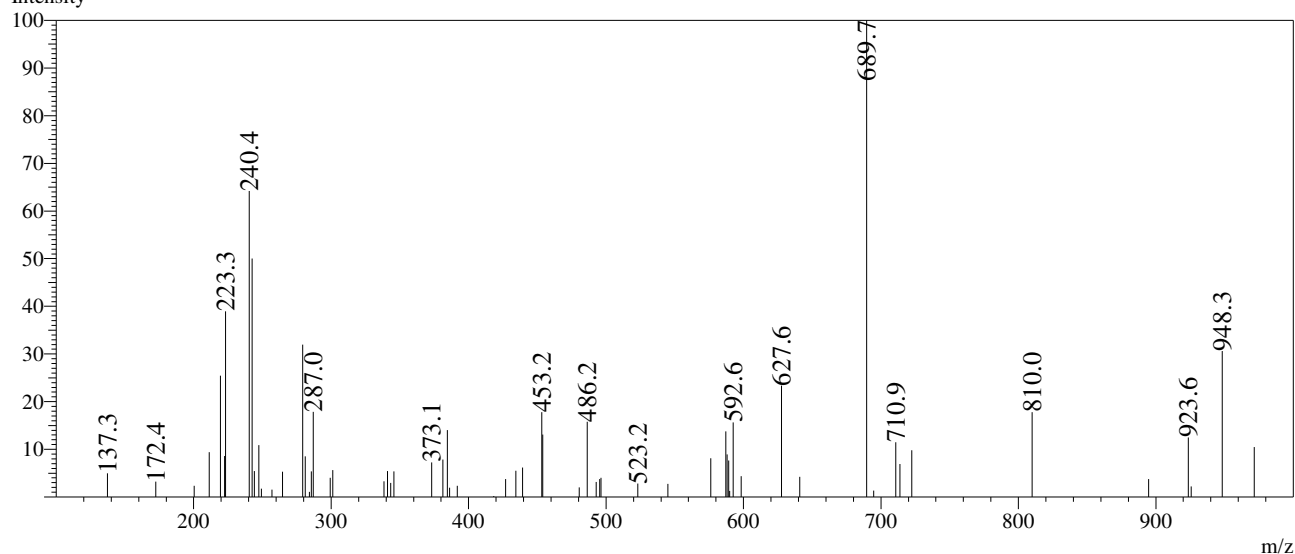

RefTime: 1.002 Datafile: D:\DATA\2020\2009\200924\EB1773-69-P1G.lcd

Intensity

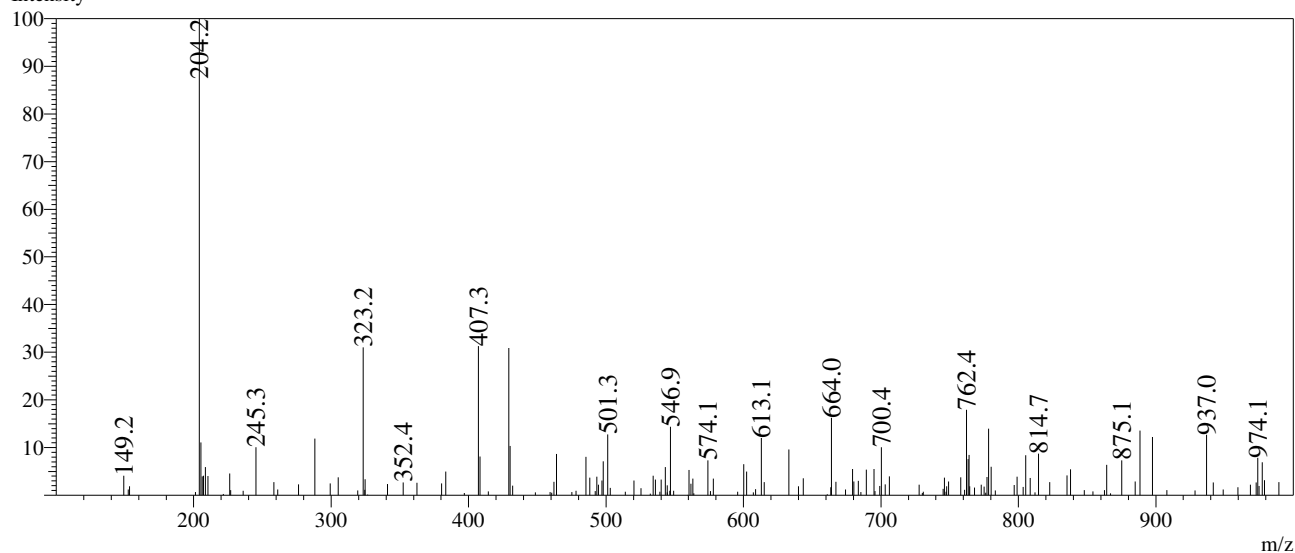

RefTime: 1.388 Datafile: D:\DATA\2020\2009\200924\EB1773-69-P1G.lcd

Intensity

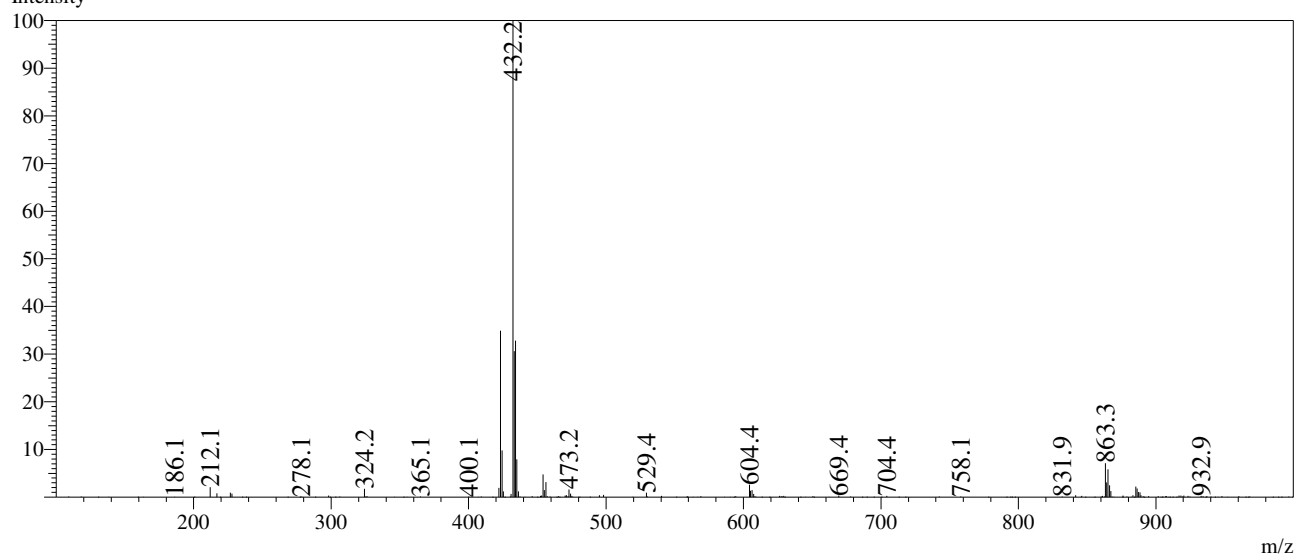

Supplement: d1cc00050k1.zip [file ALP-POS-ddb41b15-1.pdf › new_ESI/spectroscopic_data/compound2/ALP-POS-ddb41b15-1.pdf]
