# Supplementary material for: Discovery of SARS-CoV-2 main protease inhibitors using a synthesis-directed de novo design model
Source: Royal Society of Chemistry journal article supplement (doi:10.1039/d1cc00050k), 2021-01-01

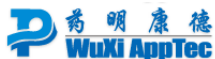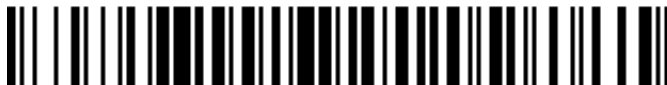

|                     |                                       |
|---------------------|---------------------------------------|
| Document Number:    | EB2224-120A                           |
| Title:              | EB2224-120-P1B.pdf                    |
| Chemist:            | ZHOU,PENG                             |
| Created Date:       | Sep.03.2020                           |
| Last Modified Date: | Sep.07.2020                           |
| Witness:            | Witnessed by CHEN, HUI on Sep.07.2020 |
| Print Date:         | Nov.10.2020                           |
| Copyright:          | WuXi AppTec                           |
| Classifications:    | Confidential, Vital Integrity         |

[EB2224-120A] EB2224-120-P1B.pdf

3

# LCMS REPORT

Print time : 09/03/2020 09:08:51  
Compound ID : 1  
Sample ID : EB2224-120-P1B  
Injection Date : 2020/9/3 9:04:41  
Injection Vol : 6ul  
Location : tray1 vial2  
Acq Method : 0-30CD\_4min\_Pos\_220&254\_Shimadzu.lcm  
Org Data File : D:\DATA\2020\2009\200903\EB2224-120-P1B.lcd  
Instrument & column: LCMS\_02 1-2402  
XBridge Shield RP18, 5um, 2.1\*50mm

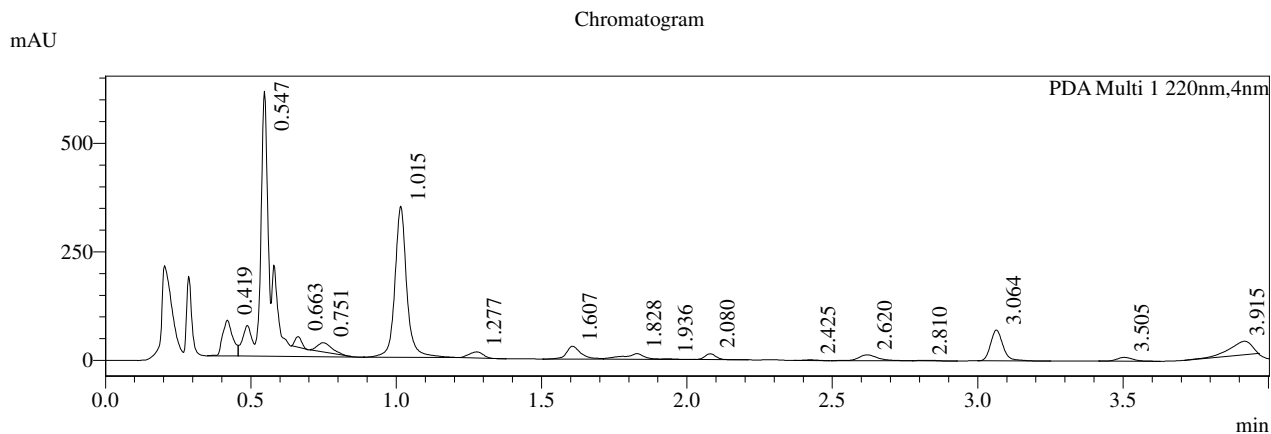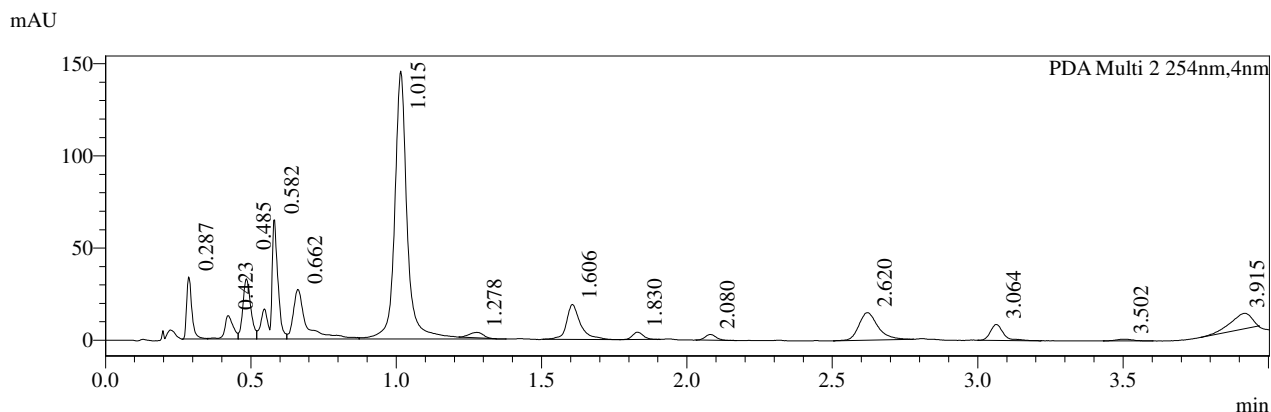

- 1 PDA Multi 1 / 220nm,4nm
- 2 PDA Multi 2 / 254nm,4nm

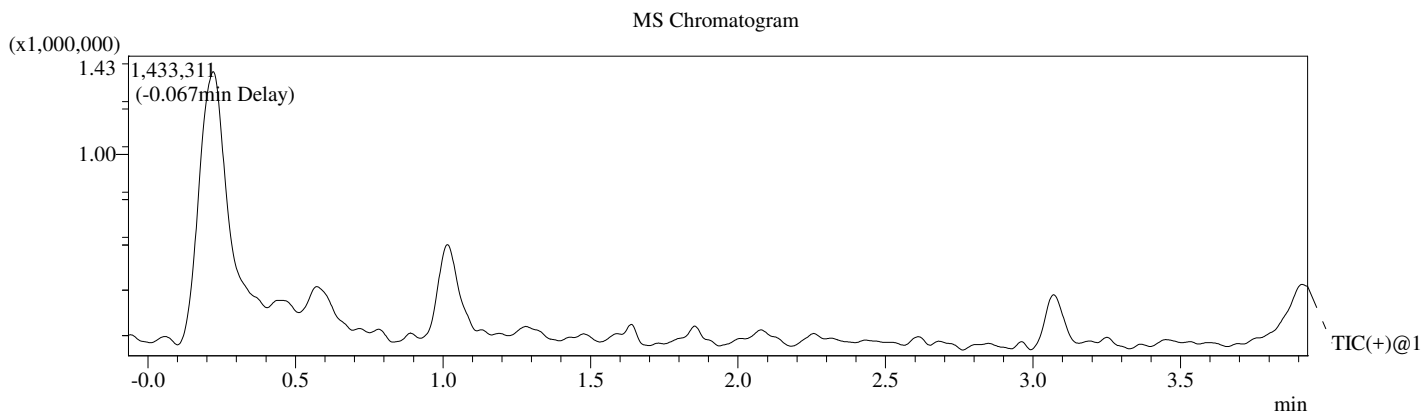

Integration Result

## PDA Ch1 220nm

| Peak# | Ret. Time | Height | Height% | USP Width | Area    | Area%  |
|-------|-----------|--------|---------|-----------|---------|--------|
| 1     | 0.419     | 80426  | 6.500   | 0.070     | 199757  | 5.471  |
| 2     | 0.547     | 572489 | 46.266  | 0.047     | 1615850 | 44.257 |
| 3     | 0.663     | 24209  | 1.956   | 0.046     | 37695   | 1.032  |
| 4     | 0.751     | 21526  | 1.740   | 0.093     | 73198   | 2.005  |
| 5     | 1.015     | 342178 | 27.653  | 0.072     | 985339  | 26.988 |
| 6     | 1.277     | 13902  | 1.123   | 0.093     | 45583   | 1.248  |
| 7     | 1.607     | 29591  | 2.391   | 0.087     | 105323  | 2.885  |
| 8     | 1.828     | 12807  | 1.035   | 0.098     | 65850   | 1.804  |
| 9     | 1.936     | 1260   | 0.102   | 0.097     | 3319    | 0.091  |
| 10    | 2.080     | 13040  | 1.054   | 0.072     | 34227   | 0.937  |
| 11    | 2.425     | 1586   | 0.128   | 0.085     | 4922    | 0.135  |
| 12    | 2.620     | 13469  | 1.089   | 0.115     | 61081   | 1.673  |
| 13    | 2.810     | 1110   | 0.090   | 0.098     | 4109    | 0.113  |
| 14    | 3.064     | 69779  | 5.639   | 0.079     | 210781  | 5.773  |
| 15    | 3.505     | 8706   | 0.704   | 0.101     | 33087   | 0.906  |
| 16    | 3.915     | 31320  | 2.531   | 0.143     | 170933  | 4.682  |

## PDA Ch2 254nm

| Peak# | Ret. Time | Height | Height% | USP Width | Area   | Area%  |
|-------|-----------|--------|---------|-----------|--------|--------|
| 1     | 0.287     | 32145  | 8.677   | 0.036     | 42169  | 4.217  |
| 2     | 0.423     | 12564  | 3.391   | 0.058     | 25845  | 2.584  |
| 3     | 0.485     | 32164  | 8.682   | 0.054     | 62266  | 6.226  |
| 4     | 0.582     | 62614  | 16.901  | 0.040     | 114199 | 11.419 |
| 5     | 0.662     | 26573  | 7.173   | 0.064     | 85338  | 8.533  |
| 6     | 1.015     | 142714 | 38.523  | 0.072     | 435627 | 43.559 |
| 7     | 1.278     | 2955   | 0.798   | 0.093     | 9805   | 0.980  |
| 8     | 1.606     | 18812  | 5.078   | 0.082     | 63637  | 6.363  |
| 9     | 1.830     | 3989   | 1.077   | 0.070     | 10278  | 1.028  |
| 10    | 2.080     | 3085   | 0.833   | 0.072     | 8212   | 0.821  |
| 11    | 2.620     | 14866  | 4.013   | 0.117     | 67847  | 6.784  |
| 12    | 3.064     | 8527   | 2.302   | 0.079     | 26618  | 2.662  |
| 13    | 3.502     | 933    | 0.252   | 0.105     | 3746   | 0.375  |
| 14    | 3.915     | 8527   | 2.302   | 0.142     | 44507  | 4.450  |

Operator:\_\_\_\_\_

Date:\_\_\_\_\_

Mass Spectrum  
RefTime: 0.420 Datafile: D:\DATA\2020\2009\200903\EB2224-120-P1B.lcd

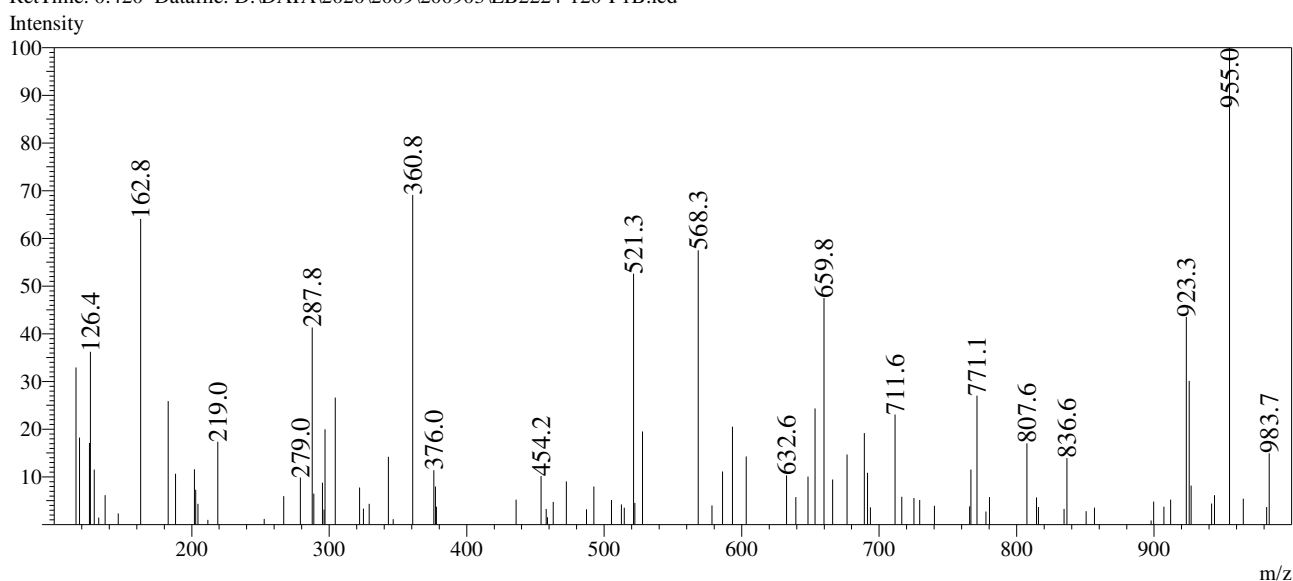

RefTime: 0.547 Datafile: D:\DATA\2020\2009\200903\EB2224-120-P1B.lcd

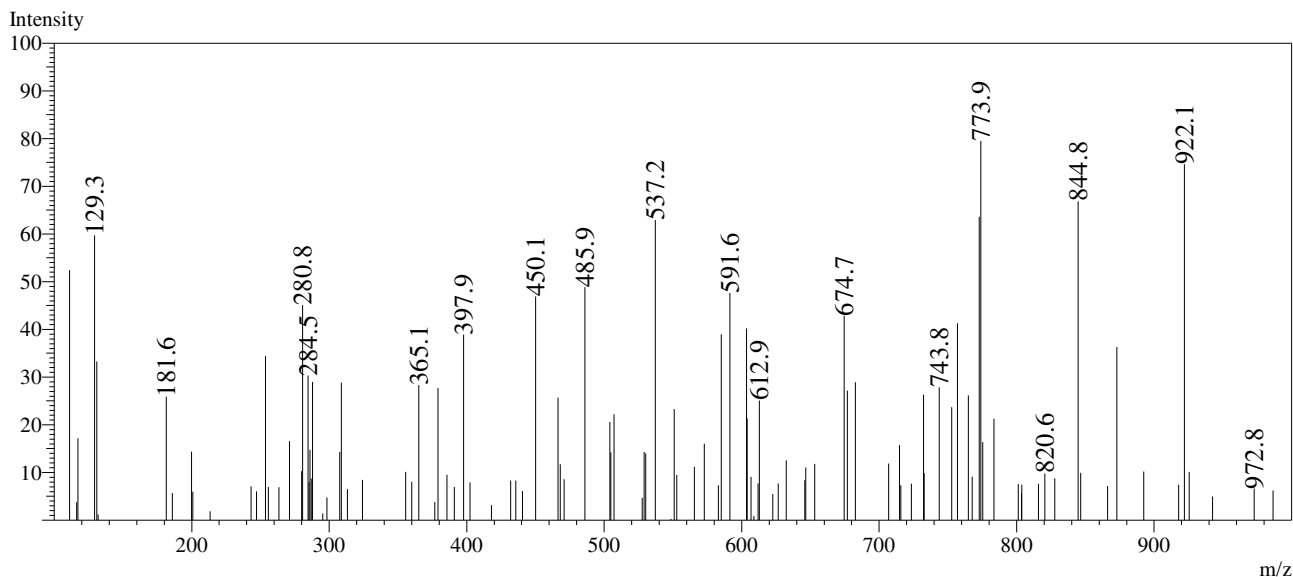

RefTime: 0.750 Datafile: D:\DATA\2020\2009\200903\EB2224-120-P1B.lcd

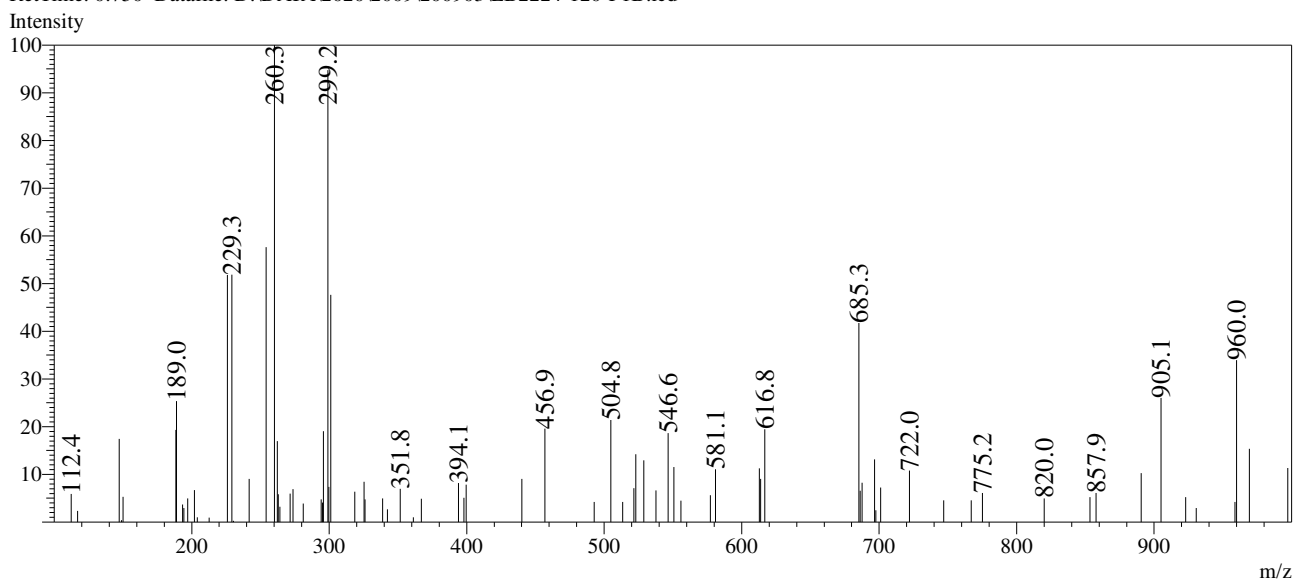

RefTime: 1.017 Datafile: D:\DATA\2020\2009\200903\EB2224-120-P1B.lcd

Intensity

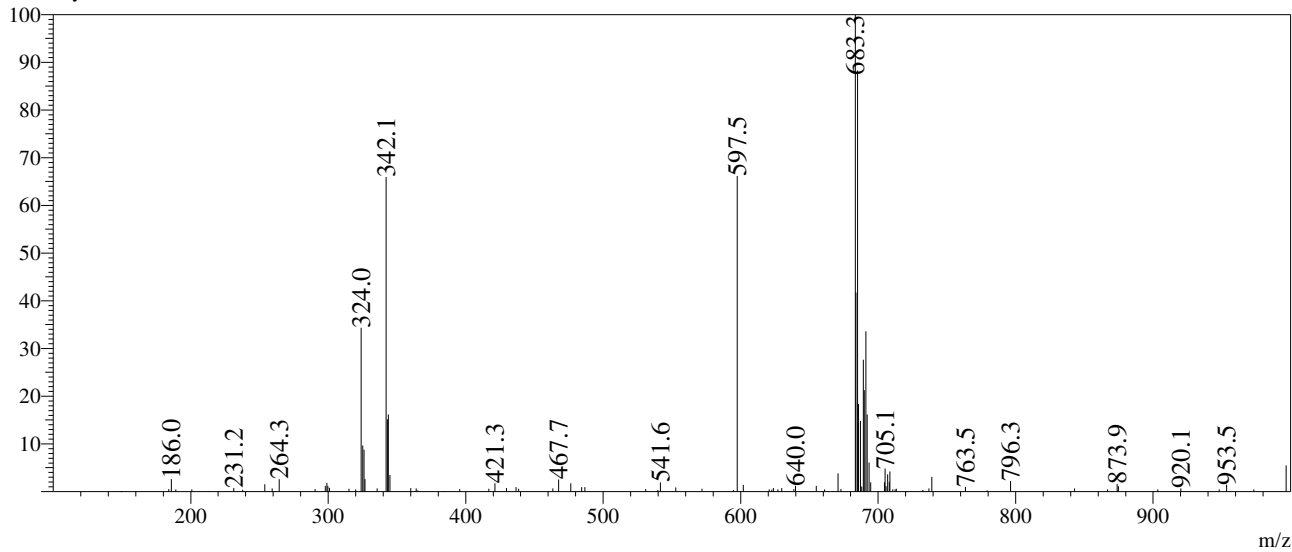

RefTime: 1.607 Datafile: D:\DATA\2020\2009\200903\EB2224-120-P1B.lcd

Intensity

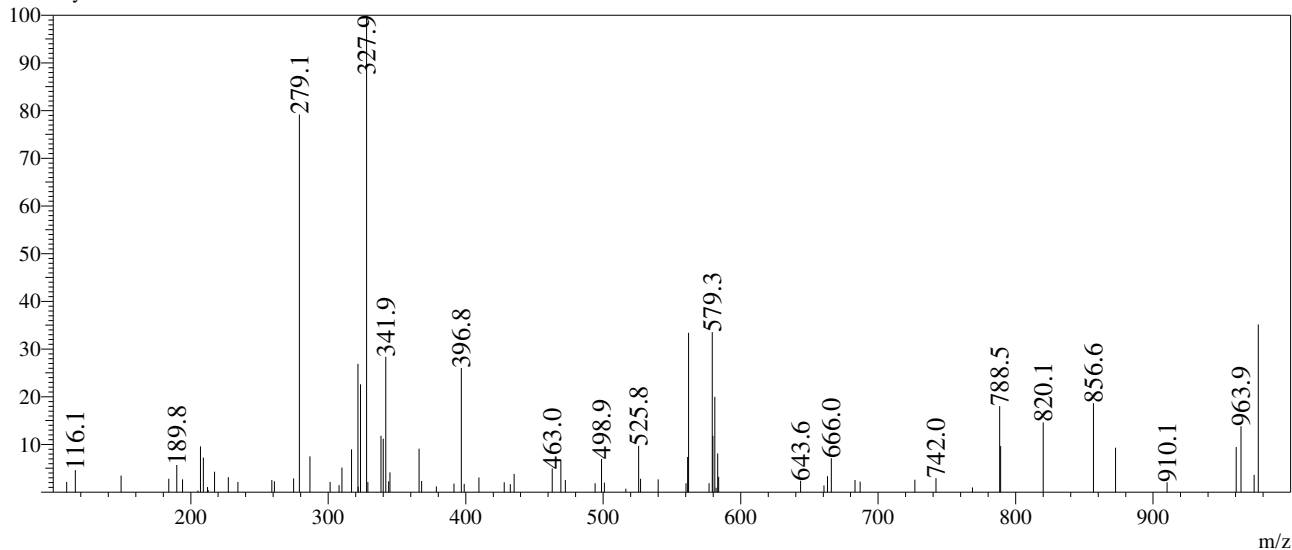

RefTime: 3.063 Datafile: D:\DATA\2020\2009\200903\EB2224-120-P1B.lcd

Intensity

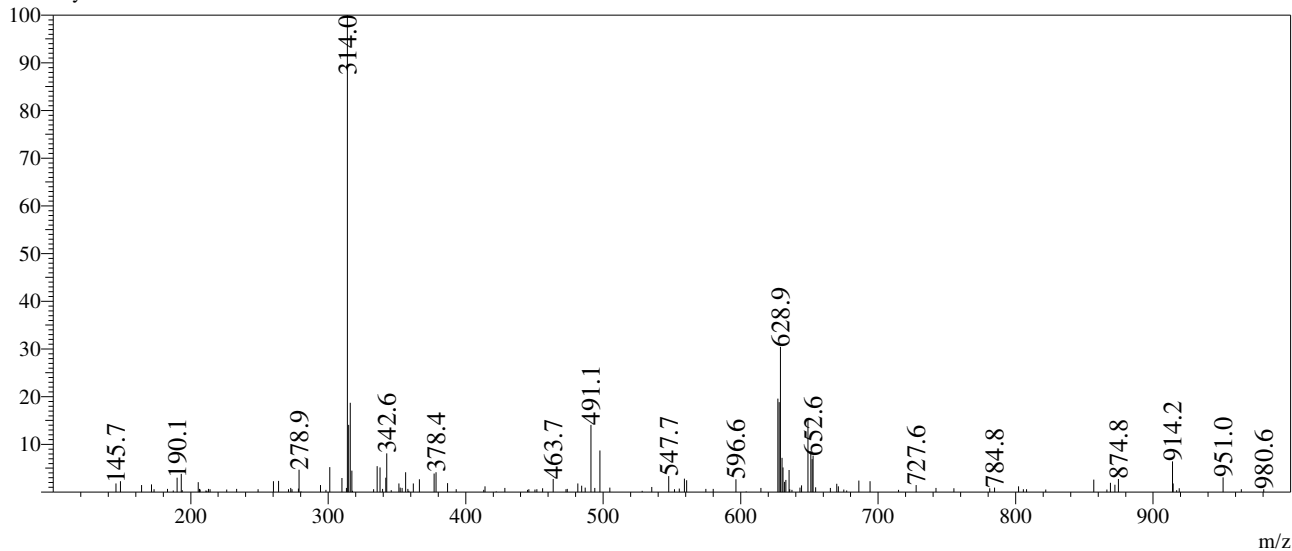

Intensity

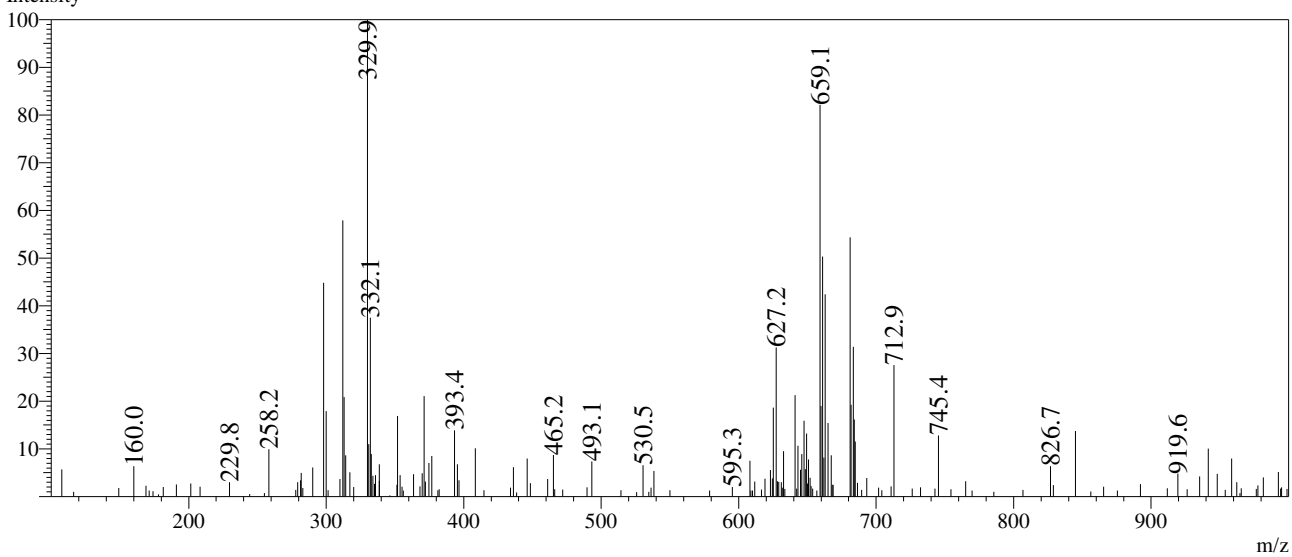

Supplement: d1cc00050k1.zip [file LC-MS_intermediate9.pdf › new_ESI/spectroscopic_data/compound2/LC-MS_intermediate9.pdf]
