# Supplementary material for: Discovery of SARS-CoV-2 main protease inhibitors using a synthesis-directed de novo design model
Source: Royal Society of Chemistry journal article supplement (doi:10.1039/d1cc00050k), 2021-01-01

# LCMS REPORT

Print time : 08/24/2020 16:23:39  
Compound ID : 1  
Sample ID : EB2224-87-P1B  
Injection Date : 8/24/2020 4:21:55 PM  
Injection Vol : 6ul  
Location : tray1 vial23  
Acq Method : 5-95AB\_1.5min\_220&254\_Shimadzu.lcm  
Org DataFile : D:\DATA\2020\2008\200824\EB2224-87-P1B.lcd  
Instrument & column: LCMS-SAW 1-2402  
Chromolith Flash RP-18, 5um,3.0\*25mm

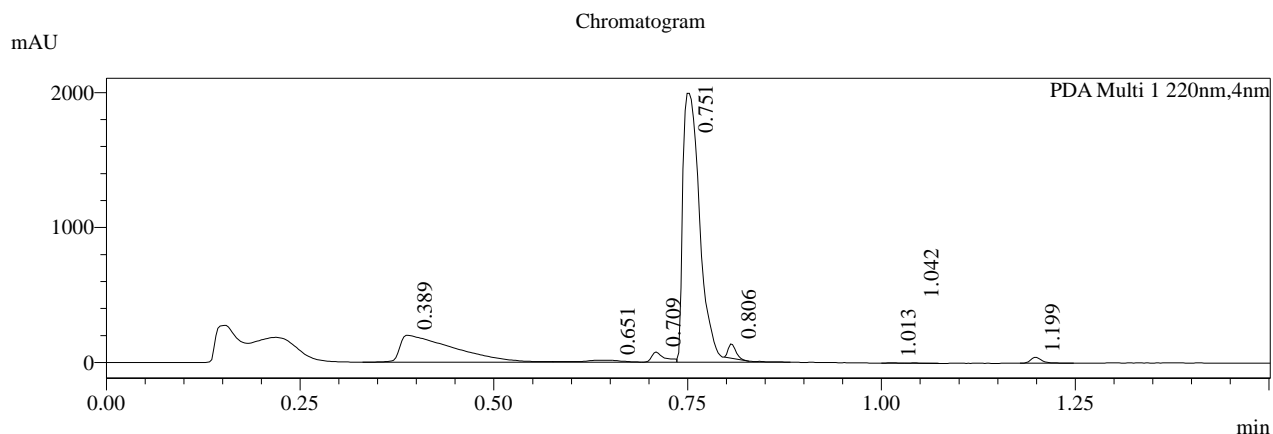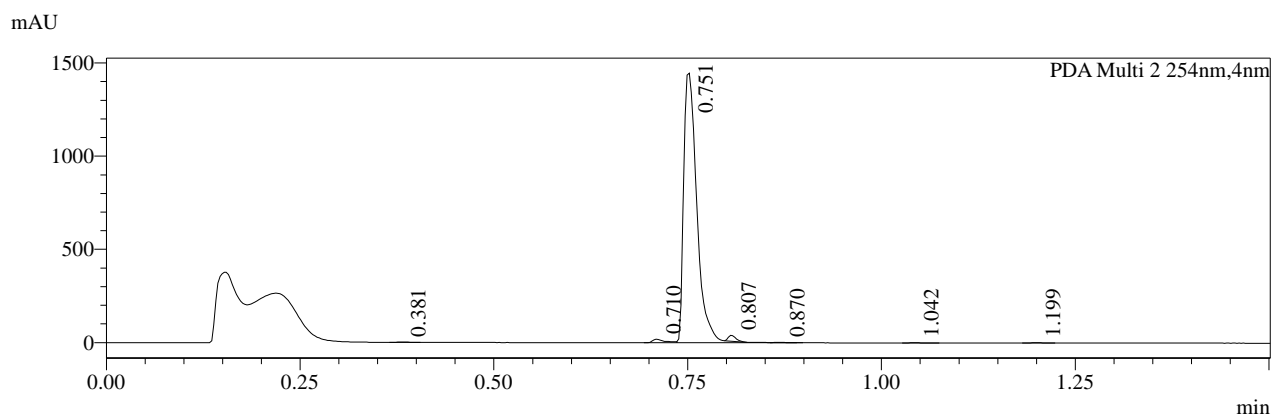

- 1 PDA Multi 1 / 220nm,4nm
- 2 PDA Multi 2 / 254nm,4nm

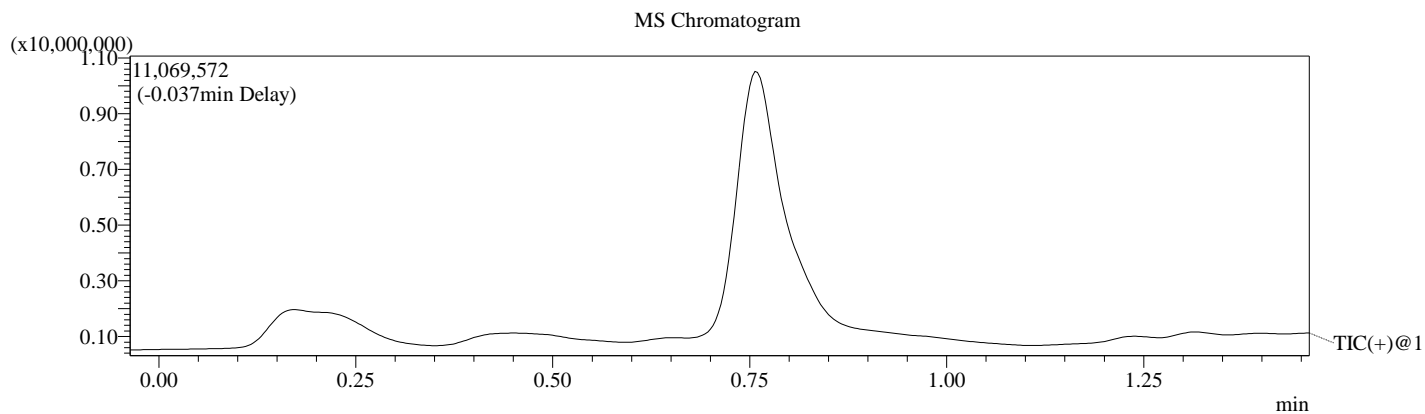

Integration Result

## PDA Ch1 220nm

| Peak# | Ret. Time | Height  | Height% | USP Width | Area    | Area%  |
|-------|-----------|---------|---------|-----------|---------|--------|
| 1     | 0.389     | 199314  | 8.181   | 0.139     | 958974  | 22.348 |
| 2     | 0.651     | 14849   | 0.610   | 0.078     | 51504   | 1.200  |
| 3     | 0.709     | 74996   | 3.078   | 0.030     | 89322   | 2.082  |
| 4     | 0.751     | 1991808 | 81.758  | 0.040     | 3071969 | 71.588 |
| 5     | 0.806     | 105484  | 4.330   | 0.021     | 69805   | 1.627  |
| 6     | 1.013     | 3551    | 0.146   | 0.023     | 2817    | 0.066  |
| 7     | 1.042     | 2364    | 0.097   | 0.027     | 2469    | 0.058  |
| 8     | 1.199     | 43864   | 1.800   | 0.028     | 44302   | 1.032  |

## PDA Ch2 254nm

| Peak# | Ret. Time | Height  | Height% | USP Width | Area    | Area%  |
|-------|-----------|---------|---------|-----------|---------|--------|
| 1     | 0.381     | 2077    | 0.138   | 0.025     | 1856    | 0.105  |
| 2     | 0.710     | 19731   | 1.311   | 0.030     | 21946   | 1.241  |
| 3     | 0.751     | 1445925 | 96.109  | 0.035     | 1718911 | 97.182 |
| 4     | 0.807     | 30584   | 2.033   | 0.021     | 20297   | 1.148  |
| 5     | 0.870     | 1396    | 0.093   | 0.027     | 1172    | 0.066  |
| 6     | 1.042     | 2755    | 0.183   | 0.028     | 2600    | 0.147  |
| 7     | 1.199     | 1989    | 0.132   | 0.030     | 1964    | 0.111  |

Operator:\_\_\_\_\_

Date:\_\_\_\_\_

Mass Spectrum  
RefTime: 0.390 Datafile: D:\DATA\2020\2008\200824\EB2224-87-P1B.lcd

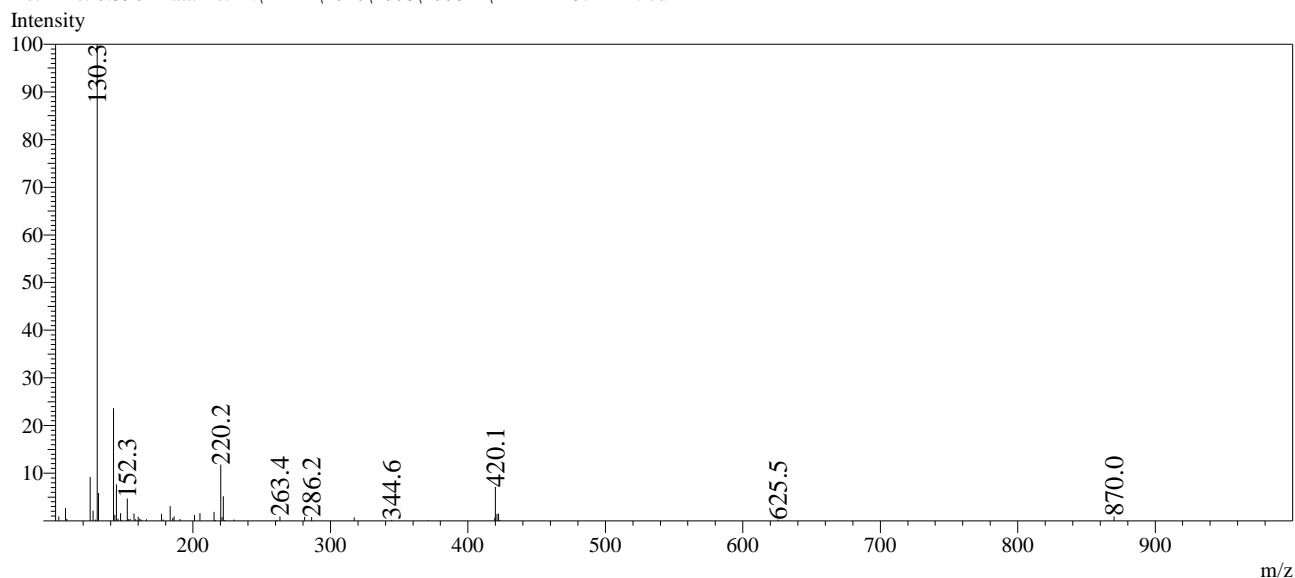

RefTime: 0.710 Datafile: D:\DATA\2020\2008\200824\EB2224-87-P1B.lcd

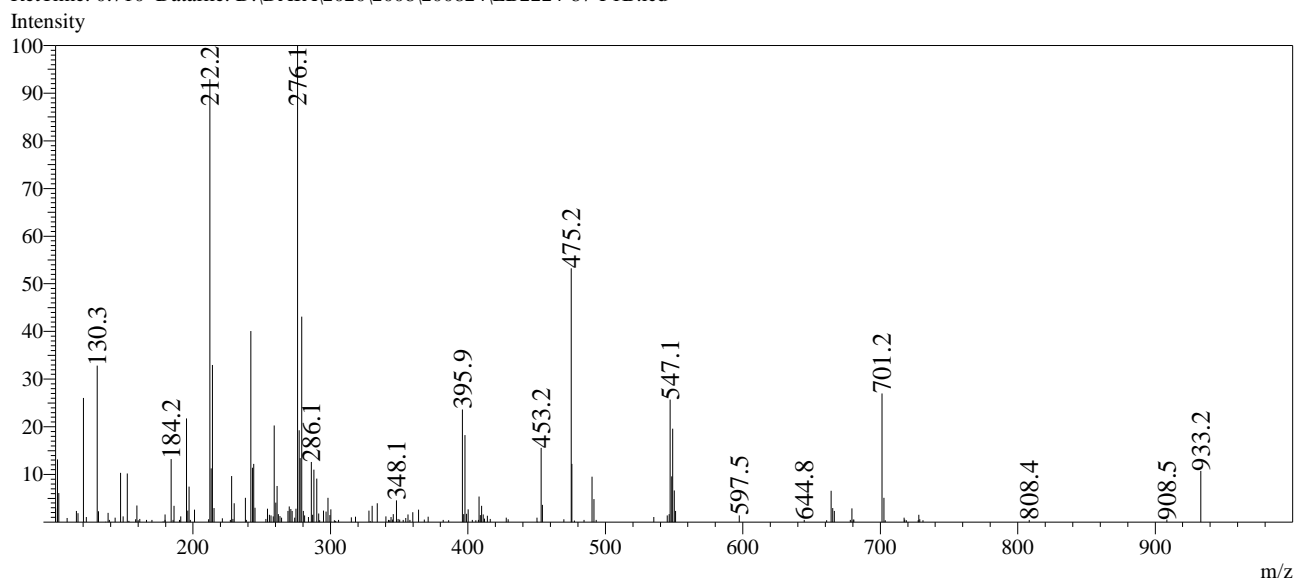

RefTime: 0.750 Datafile: D:\DATA\2020\2008\200824\EB2224-87-P1B.lcd

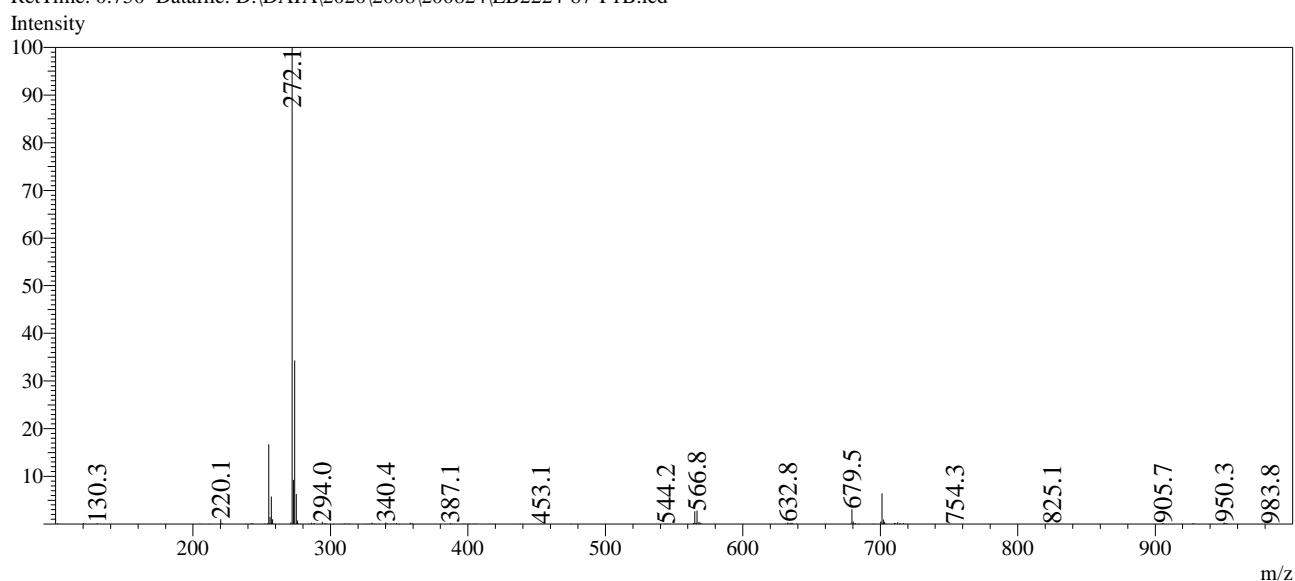

Supplement: d1cc00050k1.zip [file LC-MS_intermediate6.pdf › new_ESI/spectroscopic_data/compound5/LC-MS_intermediate6.pdf]
