# Supplementary material for: Discovery of SARS-CoV-2 main protease inhibitors using a synthesis-directed de novo design model
Source: Royal Society of Chemistry journal article supplement (doi:10.1039/d1cc00050k), 2021-01-01

# LCMS REPORT

Print time : 07/22/2020 13:05:39  
Compound ID : 1  
Sample ID : EB2224-32-P1A  
Injection Date : 7/22/2020 1:03:50 PM  
Injection Vol : 6ul  
Location : tray1 vail76  
Acq Method : 5-95AB\_1.5min\_220&254\_Shimadzu.lcm  
Org DataFile : D:\DATA\2020\2007\200722\EB2224-32-P1A.lcd  
Instrument & column: LCMS-SAW 1-2402  
Chromolith Flash RP-18, 5um,3.0\*25mm

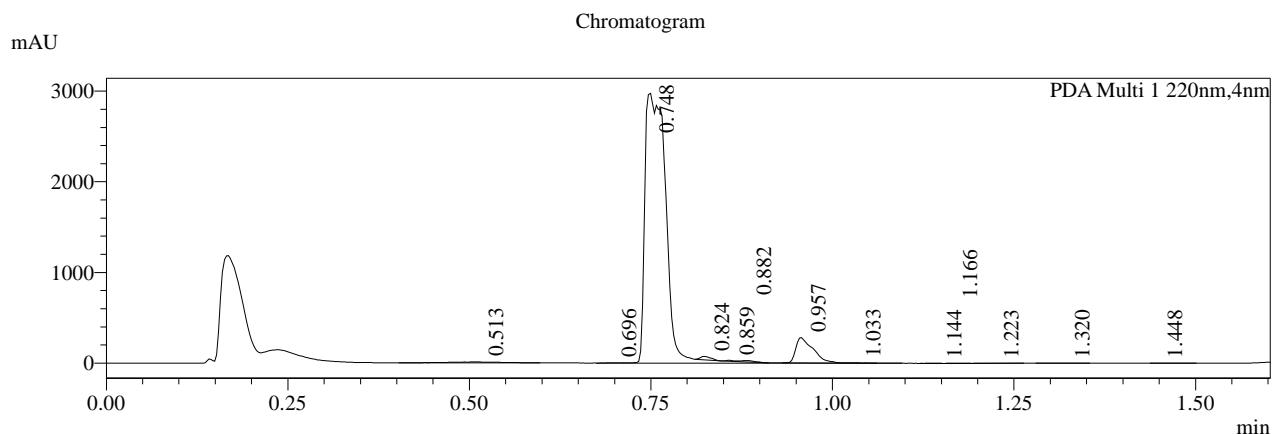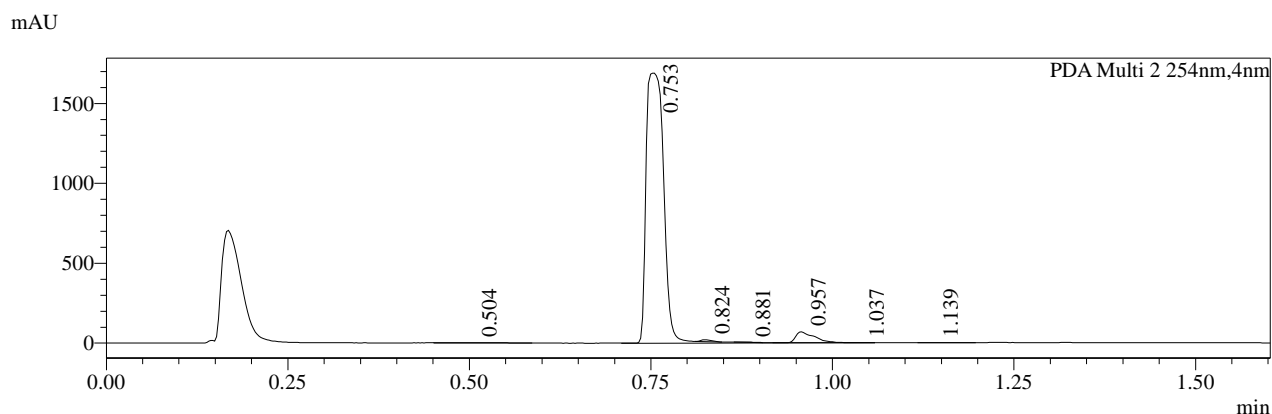

- 1 PDA Multi 1 / 220nm,4nm
- 2 PDA Multi 2 / 254nm,4nm

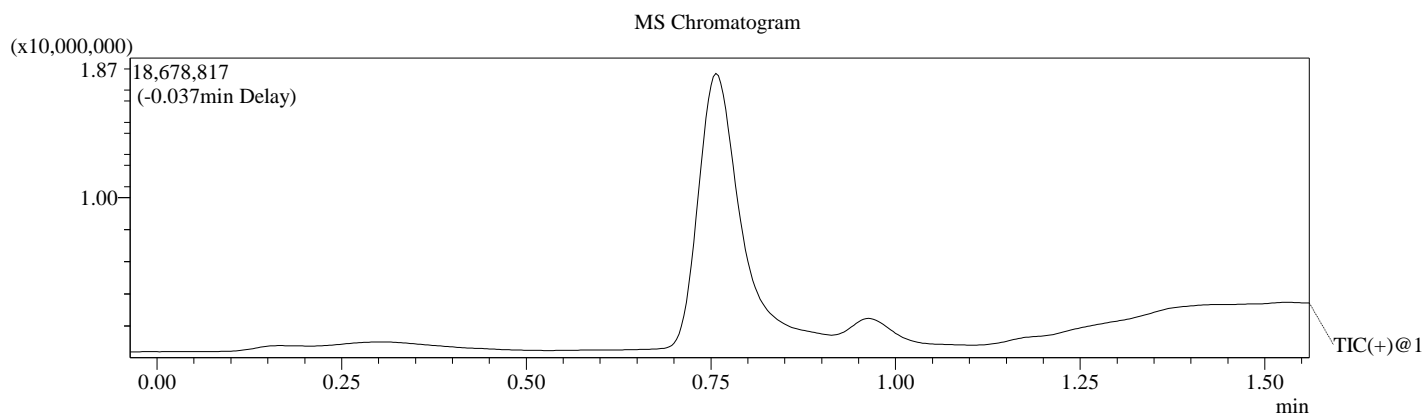

Integration Result

## PDA Ch1 220nm

| Peak# | Ret. Time | Height  | Height% | USP Width | Area    | Area%  |
|-------|-----------|---------|---------|-----------|---------|--------|
| 1     | 0.513     | 9503    | 0.284   | 0.131     | 48744   | 0.746  |
| 2     | 0.696     | 1848    | 0.055   | 0.051     | 2832    | 0.043  |
| 3     | 0.748     | 2975238 | 89.000  | 0.048     | 5934002 | 90.875 |
| 4     | 0.824     | 38252   | 1.144   | 0.033     | 38342   | 0.587  |
| 5     | 0.859     | 11114   | 0.332   | 0.032     | 8593    | 0.132  |
| 6     | 0.882     | 16861   | 0.504   | 0.050     | 22367   | 0.343  |
| 7     | 0.957     | 279953  | 8.374   | 0.047     | 458196  | 7.017  |
| 8     | 1.033     | 2500    | 0.075   | 0.043     | 3080    | 0.047  |
| 9     | 1.144     | 1220    | 0.036   | 0.036     | 1481    | 0.023  |
| 10    | 1.166     | 1505    | 0.045   | 0.031     | 1435    | 0.022  |
| 11    | 1.223     | 2091    | 0.063   | 0.066     | 5304    | 0.081  |
| 12    | 1.320     | 2012    | 0.060   | 0.047     | 4224    | 0.065  |
| 13    | 1.448     | 861     | 0.026   | 0.053     | 1254    | 0.019  |

## PDA Ch2 254nm

| Peak# | Ret. Time | Height  | Height% | USP Width | Area    | Area%  |
|-------|-----------|---------|---------|-----------|---------|--------|
| 1     | 0.504     | 2695    | 0.152   | 0.154     | 13245   | 0.444  |
| 2     | 0.753     | 1688570 | 95.162  | 0.042     | 2831848 | 95.009 |
| 3     | 0.824     | 11766   | 0.663   | 0.034     | 12389   | 0.416  |
| 4     | 0.881     | 1831    | 0.103   | 0.039     | 1981    | 0.066  |
| 5     | 0.957     | 68135   | 3.840   | 0.054     | 118834  | 3.987  |
| 6     | 1.037     | 777     | 0.044   | 0.055     | 1260    | 0.042  |
| 7     | 1.139     | 638     | 0.036   | 0.027     | 1067    | 0.036  |

Operator:\_\_\_\_\_

Date:\_\_\_\_\_

Mass Spectrum  
RetTime: 0.747 Datafile: D:\DATA\2020\2007\200722\EB2224-32-P1A.lcd

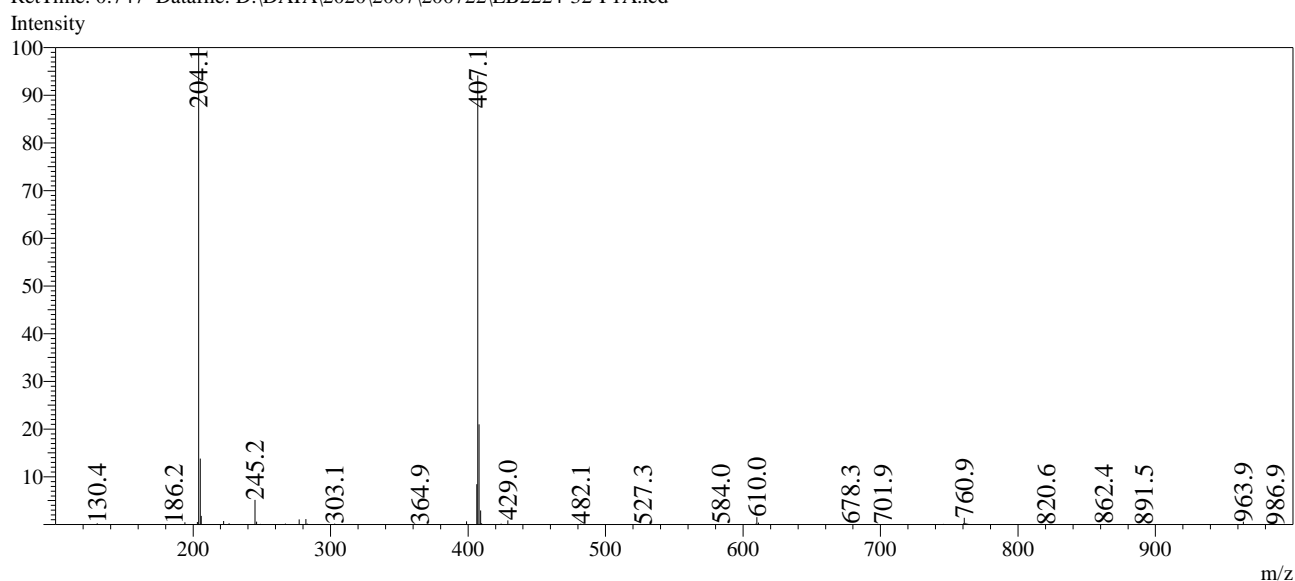

RetTime: 0.957 Datafile: D:\DATA\2020\2007\200722\EB2224-32-P1A.lcd

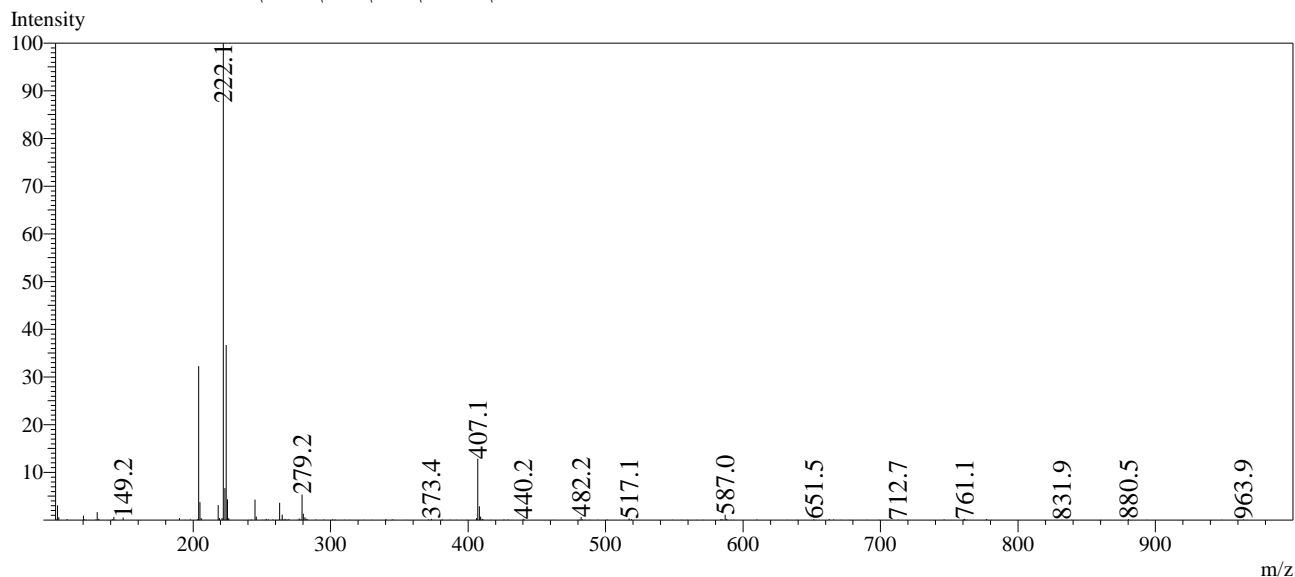

Supplement: d1cc00050k1.zip [file ALP-POS-ddb41b15-4_LCMS_intermediate6.pdf › new_ESI/spectroscopic_data/compound1/ALP-POS-ddb41b15-4_LCMS_intermediate6.pdf]
