# Supplementary material for: Discovery of SARS-CoV-2 main protease inhibitors using a synthesis-directed de novo design model
Source: Royal Society of Chemistry journal article supplement (doi:10.1039/d1cc00050k), 2021-01-01

# LCMS REPORT

Print time : 07/30/2020 14:22:01  
Compound ID : 1  
Sample ID : EB2257-29-P1A  
Injection Date : 2020/7/30 14:17:50  
Injection Vol : 2ul  
Location : tray1 vail61  
Acq Method : 10-80AB\_4min\_220&254\_Shimadzu.lcm  
Org Data File : D:\DATA\2020\2007\200730\EB2257-29-P1A.lcd  
Instrument & column: LCMS\_04 1-2402  
Xtimate C18, 3um,2.1\*30mm

Chromatogram

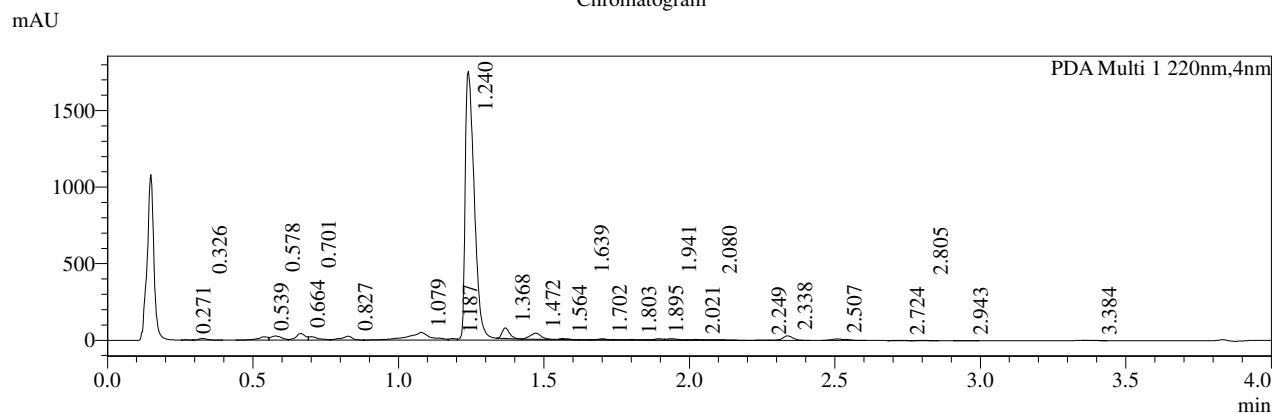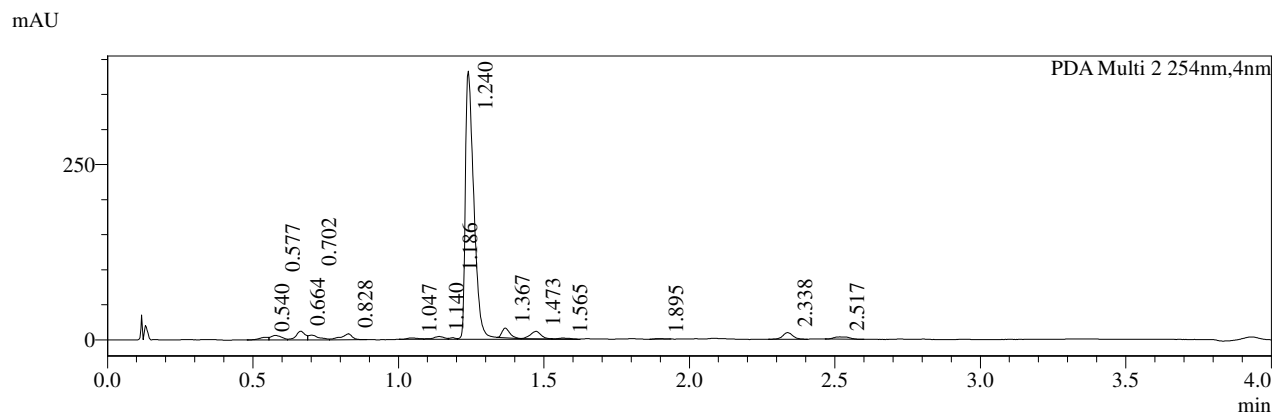

- 1 PDA Multi 1 / 220nm,4nm
- 2 PDA Multi 2 / 254nm,4nm

MS Chromatogram

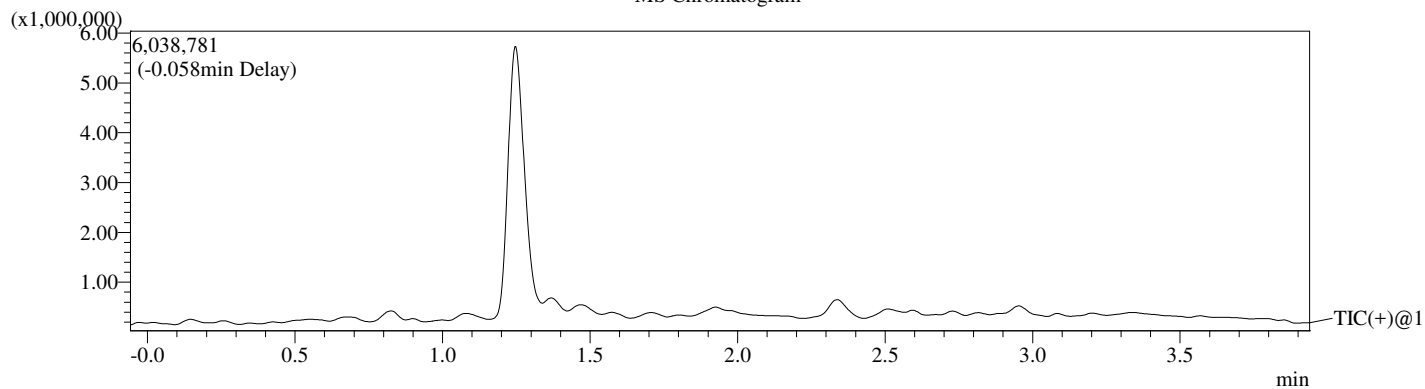

=====  
Integration Result  
=====

## PDA Ch1 220nm

| Peak# | Ret. Time | Height  | Height% | USP Width | Area    | Area%  |
|-------|-----------|---------|---------|-----------|---------|--------|
| 1     | 0.271     | 1035    | 0.048   | 0.038     | 1337    | 0.026  |
| 2     | 0.326     | 10115   | 0.466   | 0.055     | 19562   | 0.380  |
| 3     | 0.539     | 22270   | 1.026   | 0.104     | 55335   | 1.075  |
| 4     | 0.578     | 27132   | 1.250   | 0.099     | 71007   | 1.379  |
| 5     | 0.664     | 44095   | 2.032   | 0.069     | 99958   | 1.942  |
| 6     | 0.701     | 22481   | 1.036   | 0.170     | 51743   | 1.005  |
| 7     | 0.827     | 26026   | 1.199   | 0.066     | 70852   | 1.376  |
| 8     | 1.079     | 50984   | 2.349   | 0.103     | 281037  | 5.460  |
| 9     | 1.187     | 10737   | 0.495   | 0.086     | 17253   | 0.335  |
| 10    | 1.240     | 1756406 | 80.929  | 0.061     | 4020229 | 78.098 |
| 11    | 1.368     | 69796   | 3.216   | 0.050     | 122280  | 2.375  |
| 12    | 1.472     | 39711   | 1.830   | 0.074     | 103067  | 2.002  |
| 13    | 1.564     | 6995    | 0.322   | 0.069     | 16410   | 0.319  |
| 14    | 1.639     | 1182    | 0.054   | 0.046     | 1686    | 0.033  |
| 15    | 1.702     | 7088    | 0.327   | 0.060     | 14800   | 0.288  |
| 16    | 1.803     | 2614    | 0.120   | 0.093     | 9746    | 0.189  |
| 17    | 1.895     | 8507    | 0.392   | 0.092     | 18866   | 0.366  |
| 18    | 1.941     | 9273    | 0.427   | 0.098     | 26300   | 0.511  |
| 19    | 2.021     | 4654    | 0.214   | 0.081     | 10883   | 0.211  |
| 20    | 2.080     | 4009    | 0.185   | 0.129     | 17050   | 0.331  |
| 21    | 2.249     | 2252    | 0.104   | 0.075     | 5202    | 0.101  |
| 22    | 2.338     | 29222   | 1.346   | 0.066     | 71450   | 1.388  |
| 23    | 2.507     | 9291    | 0.428   | 0.099     | 32014   | 0.622  |
| 24    | 2.724     | 1029    | 0.047   | 0.067     | 2501    | 0.049  |
| 25    | 2.805     | 1584    | 0.073   | 0.055     | 3263    | 0.063  |
| 26    | 2.943     | 774     | 0.036   | 0.060     | 1669    | 0.032  |
| 27    | 3.384     | 1043    | 0.048   | 0.061     | 2165    | 0.042  |

## PDA Ch2 254nm

| Peak# | Ret. Time | Height | Height% | USP Width | Area   | Area%  |
|-------|-----------|--------|---------|-----------|--------|--------|
| 1     | 0.540     | 3877   | 0.828   | 0.157     | 8595   | 0.863  |
| 2     | 0.577     | 6427   | 1.373   | 0.089     | 16255  | 1.632  |
| 3     | 0.664     | 12397  | 2.648   | 0.069     | 26996  | 2.710  |
| 4     | 0.702     | 6673   | 1.425   | 0.172     | 16639  | 1.670  |
| 5     | 0.828     | 8425   | 1.799   | 0.064     | 22485  | 2.257  |
| 6     | 1.047     | 2173   | 0.464   | 0.076     | 5731   | 0.575  |
| 7     | 1.140     | 4019   | 0.858   | 0.075     | 10899  | 1.094  |
| 8     | 1.186     | 2214   | 0.473   | 0.061     | 3198   | 0.321  |
| 9     | 1.240     | 382641 | 81.719  | 0.057     | 793955 | 79.695 |
| 10    | 1.367     | 13895  | 2.968   | 0.052     | 24899  | 2.499  |
| 11    | 1.473     | 10461  | 2.234   | 0.070     | 25946  | 2.604  |
| 12    | 1.565     | 1331   | 0.284   | 0.070     | 3439   | 0.345  |
| 13    | 1.895     | 920    | 0.196   | 0.059     | 1915   | 0.192  |
| 14    | 2.338     | 9504   | 2.030   | 0.065     | 22989  | 2.308  |
| 15    | 2.517     | 3281   | 0.701   | 0.092     | 12296  | 1.234  |

Operator:\_\_\_\_\_

Date:\_\_\_\_\_

# Mass Spectrum

RefTime: 1.078 Datafile: D:\DATA\2020\2007\200730\EB2257-29-P1A.lcd

Intensity

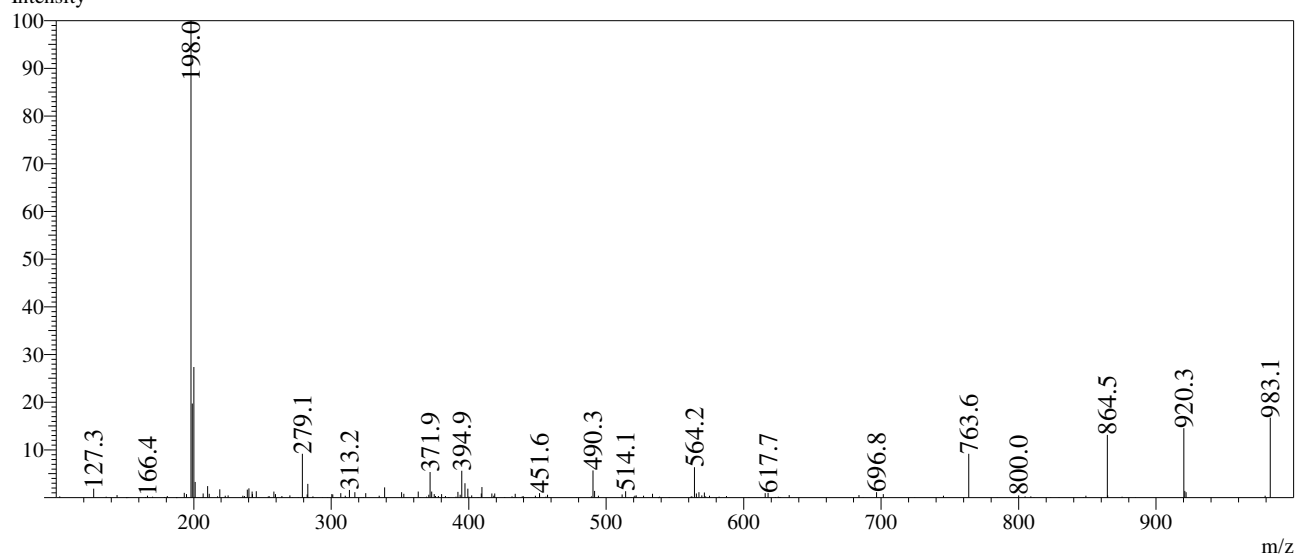

RefTime: 1.238 Datafile: D:\DATA\2020\2007\200730\EB2257-29-P1A.lcd

Intensity

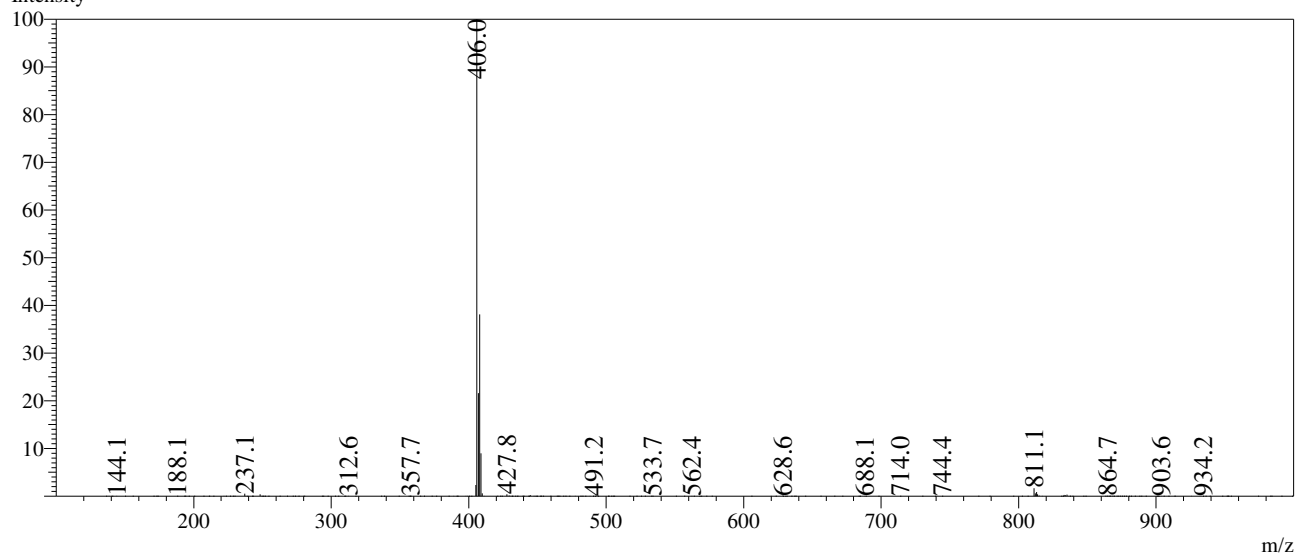

RefTime: 1.368 Datafile: D:\DATA\2020\2007\200730\EB2257-29-P1A.lcd

Intensity

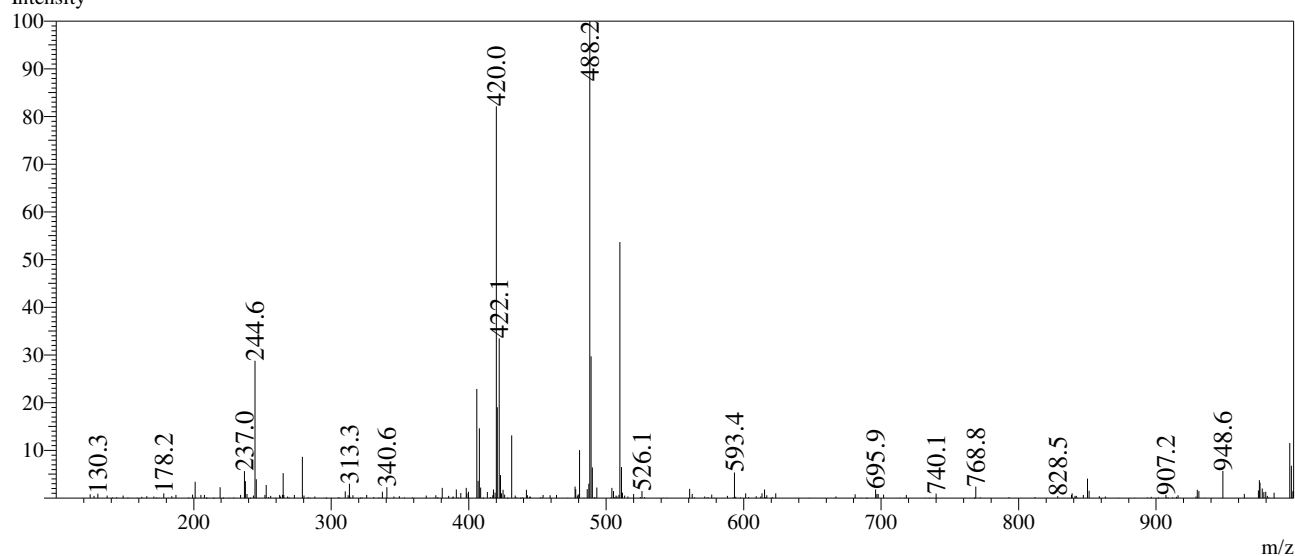

RetTime: 1.472 Datafile: D:\DATA\2020\2007\200730\EB2257-29-P1A.lcd

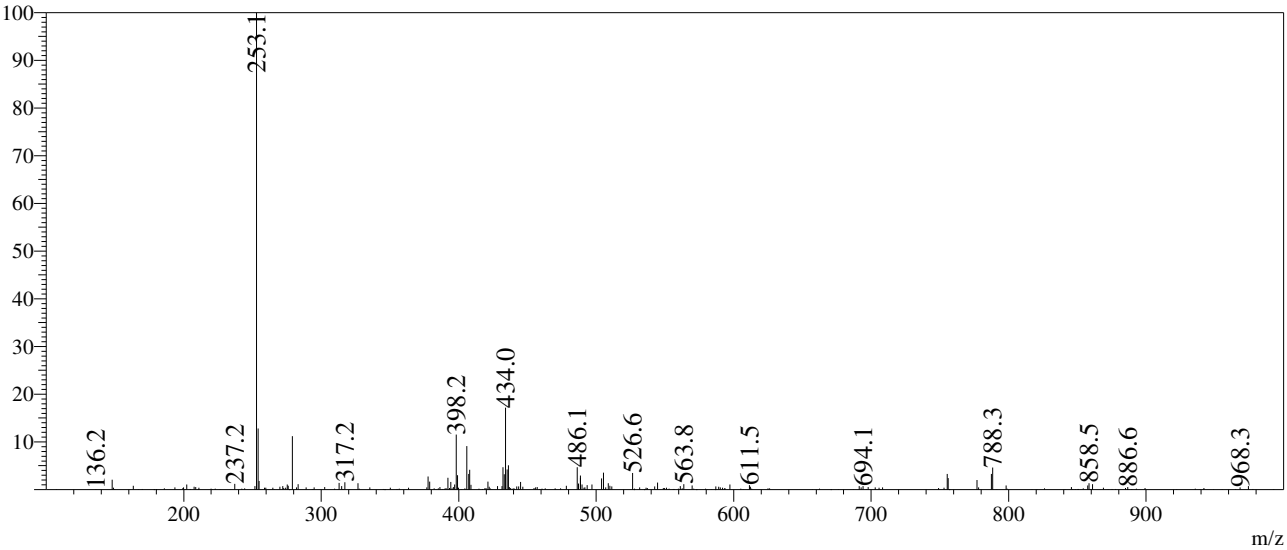

Supplement: d1cc00050k1.zip [file LC-MS_the last step.pdf › new_ESI/spectroscopic_data/compound4/LC-MS_the last step.pdf]
