# Supplementary material for: Discovery of SARS-CoV-2 main protease inhibitors using a synthesis-directed de novo design model
Source: Royal Society of Chemistry journal article supplement (doi:10.1039/d1cc00050k), 2021-01-01

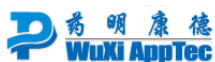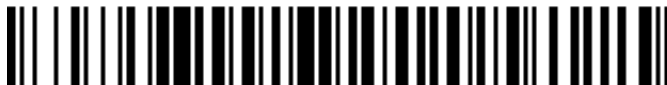

|                     |                                       |
|---------------------|---------------------------------------|
| Document Number:    | EB2224-124A                           |
| Title:              | EB2224-124-P1A.pdf                    |
| Chemist:            | ZHOU,PENG                             |
| Created Date:       | Sep.03.2020                           |
| Last Modified Date: | Sep.04.2020                           |
| Witness:            | Witnessed by CHEN, HUI on Sep.04.2020 |
| Print Date:         | Nov.10.2020                           |
| Copyright:          | WuXi AppTec                           |
| Classifications:    | Confidential, Vital Integrity         |

[EB2224-124A] EB2224-124-P1A.pdf

3

# LCMS REPORT

Print time : 09/03/2020 09:13:23  
Compound ID : 1  
Sample ID : EB2224-124-P1A  
Injection Date : 2020/9/3 9:09:13  
Injection Vol : 6ul  
Location : tray1 vial3  
Acq Method : 0-30CD\_4min\_Pos\_220&254\_Shimadzu.lcm  
Org Data File : D:\DATA\2020\2009\200903\EB2224-124-P1A.lcd  
Instrument & column: LCMS\_02 1-2402  
XBridge Shield RP18, 5um, 2.1\*50mm

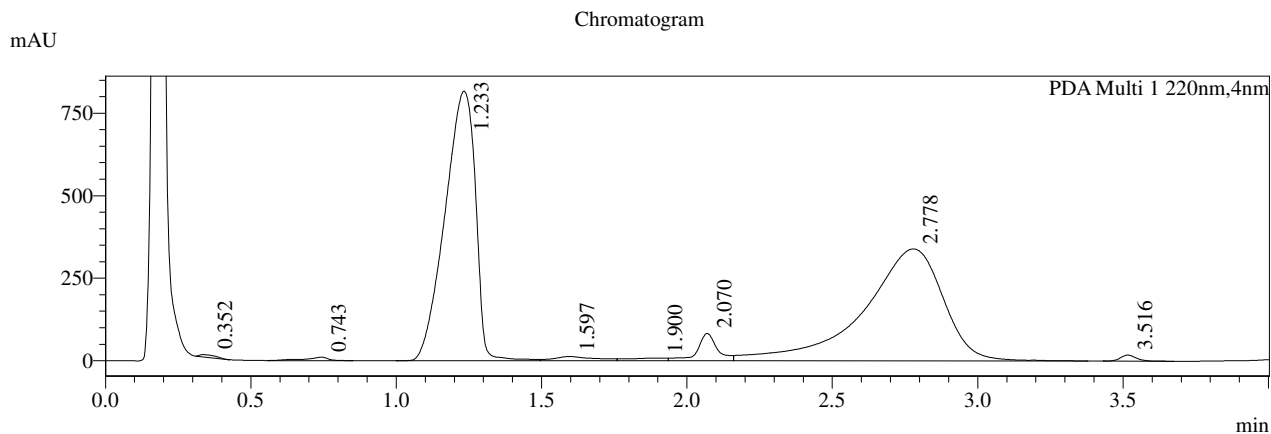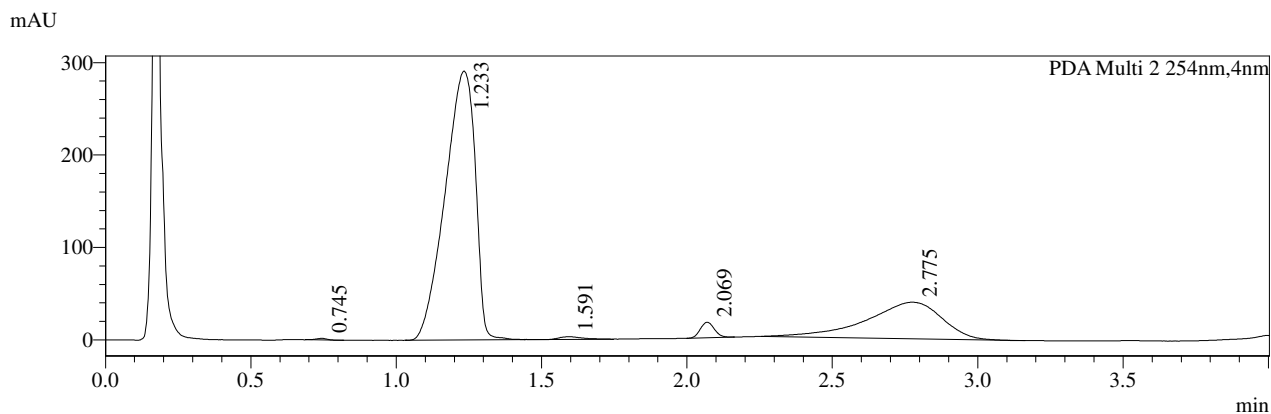

- 1 PDA Multi 1 / 220nm,4nm
- 2 PDA Multi 2 / 254nm,4nm

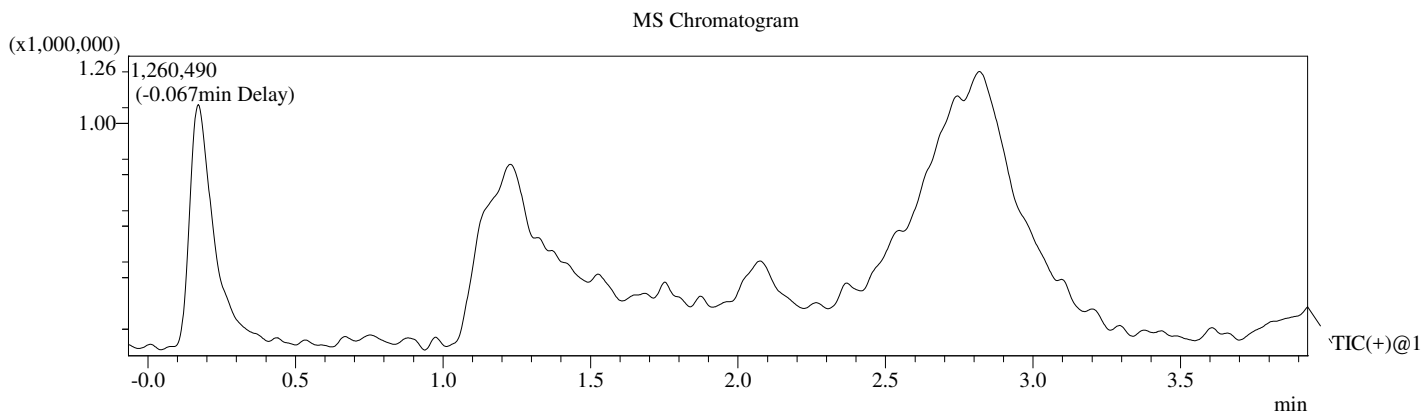

Integration Result

## PDA Ch1 220nm

| Peak# | Ret. Time | Height | Height% | USP Width | Area    | Area%  |
|-------|-----------|--------|---------|-----------|---------|--------|
| 1     | 0.352     | 7382   | 0.571   | 0.099     | 27113   | 0.206  |
| 2     | 0.743     | 10633  | 0.823   | 0.110     | 58510   | 0.444  |
| 3     | 1.233     | 813548 | 62.980  | 0.195     | 5970901 | 45.329 |
| 4     | 1.597     | 12710  | 0.984   | 0.375     | 124934  | 0.948  |
| 5     | 1.900     | 7841   | 0.607   | 10.807    | 73746   | 0.560  |
| 6     | 2.070     | 82532  | 6.389   | 0.104     | 392379  | 2.979  |
| 7     | 2.778     | 339106 | 26.252  | 0.459     | 6456975 | 49.019 |
| 8     | 3.516     | 18003  | 1.394   | 0.100     | 67870   | 0.515  |

## PDA Ch2 254nm

| Peak# | Ret. Time | Height | Height% | USP Width | Area    | Area%  |
|-------|-----------|--------|---------|-----------|---------|--------|
| 1     | 0.745     | 1732   | 0.493   | 0.072     | 4560    | 0.157  |
| 2     | 1.233     | 289979 | 82.634  | 0.194     | 2106967 | 72.701 |
| 3     | 1.591     | 2876   | 0.820   | 0.144     | 16518   | 0.570  |
| 4     | 2.069     | 16687  | 4.755   | 0.091     | 56215   | 1.940  |
| 5     | 2.775     | 39647  | 11.298  | 0.471     | 713879  | 24.632 |

Operator:\_\_\_\_\_

Date:\_\_\_\_\_

# Mass Spectrum

RefTime: 1.233 Datafile: D:\DATA\2020\2009\200903\EB2224-124-P1A.lcd

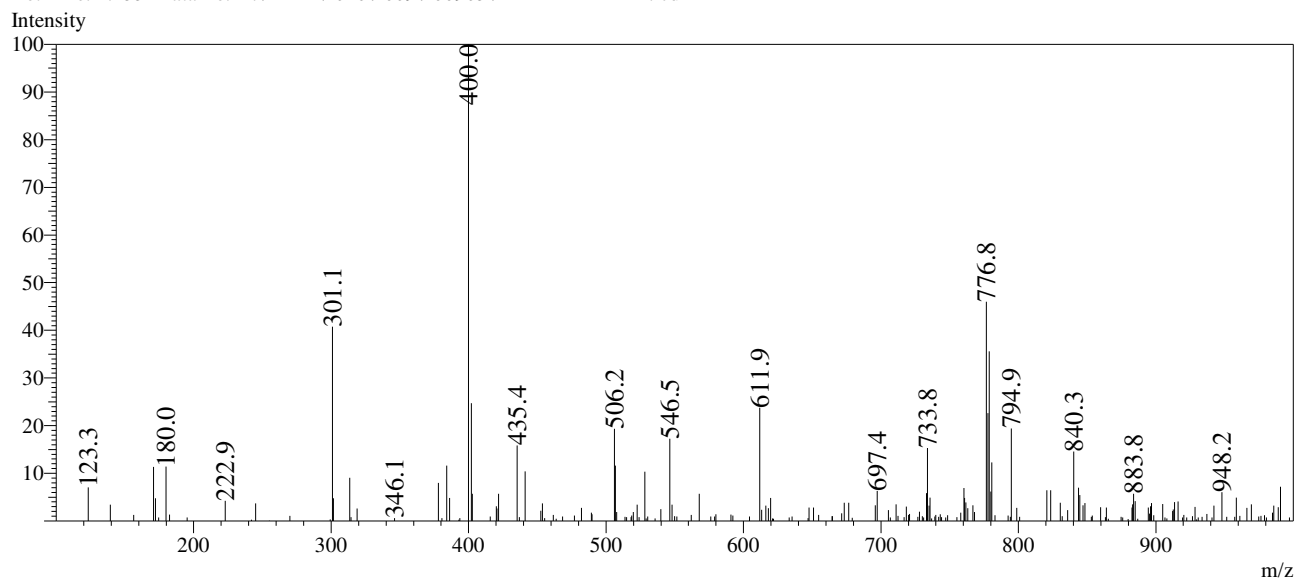

RefTime: 2.070 Datafile: D:\DATA\2020\2009\200903\EB2224-124-P1A.lcd

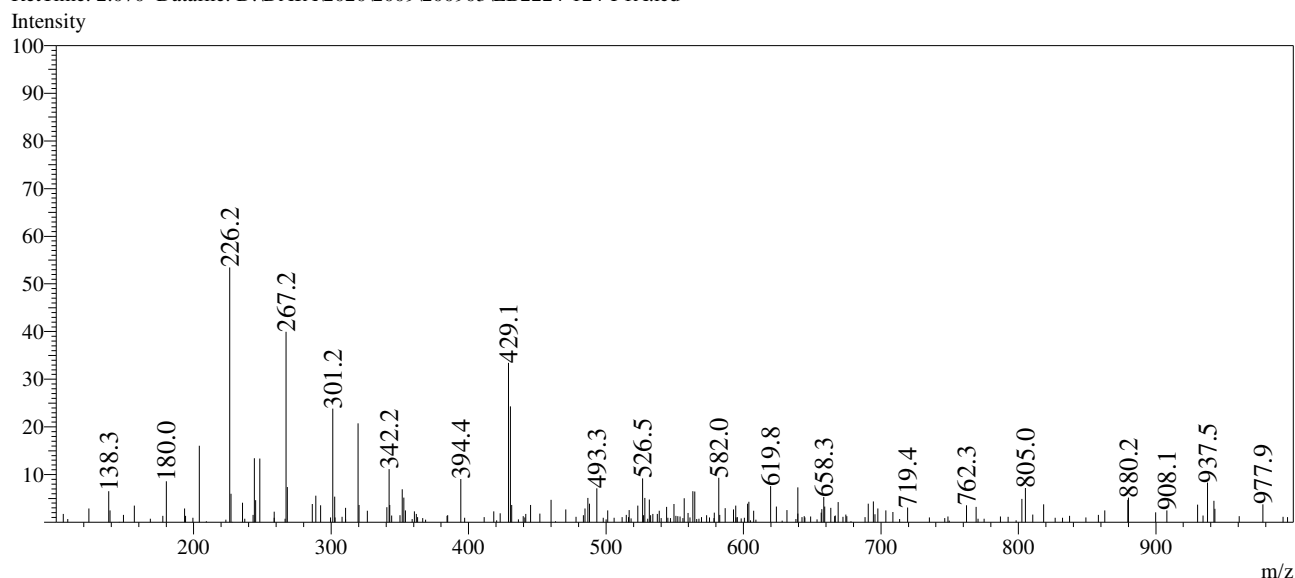

RefTime: 2.777 Datafile: D:\DATA\2020\2009\200903\EB2224-124-P1A.lcd

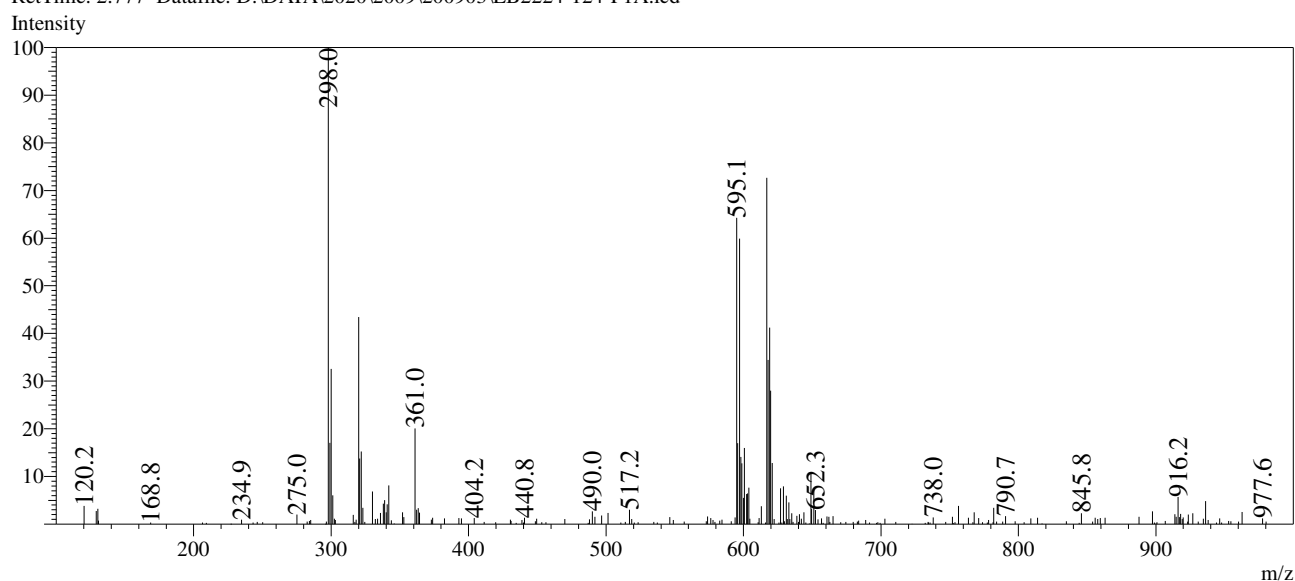

Supplement: d1cc00050k1.zip [file LC-MS_intermediate9 (NaOH).pdf › new_ESI/spectroscopic_data/compound2/LC-MS_intermediate9 (NaOH).pdf]
