# Supplementary material for: Discovery of SARS-CoV-2 main protease inhibitors using a synthesis-directed de novo design model
Source: Royal Society of Chemistry journal article supplement (doi:10.1039/d1cc00050k), 2021-01-01

Compound ID: 00000000

EB2257-29-P1B CDCl<sub>3</sub> Bruker\_NT-C\_400MHz

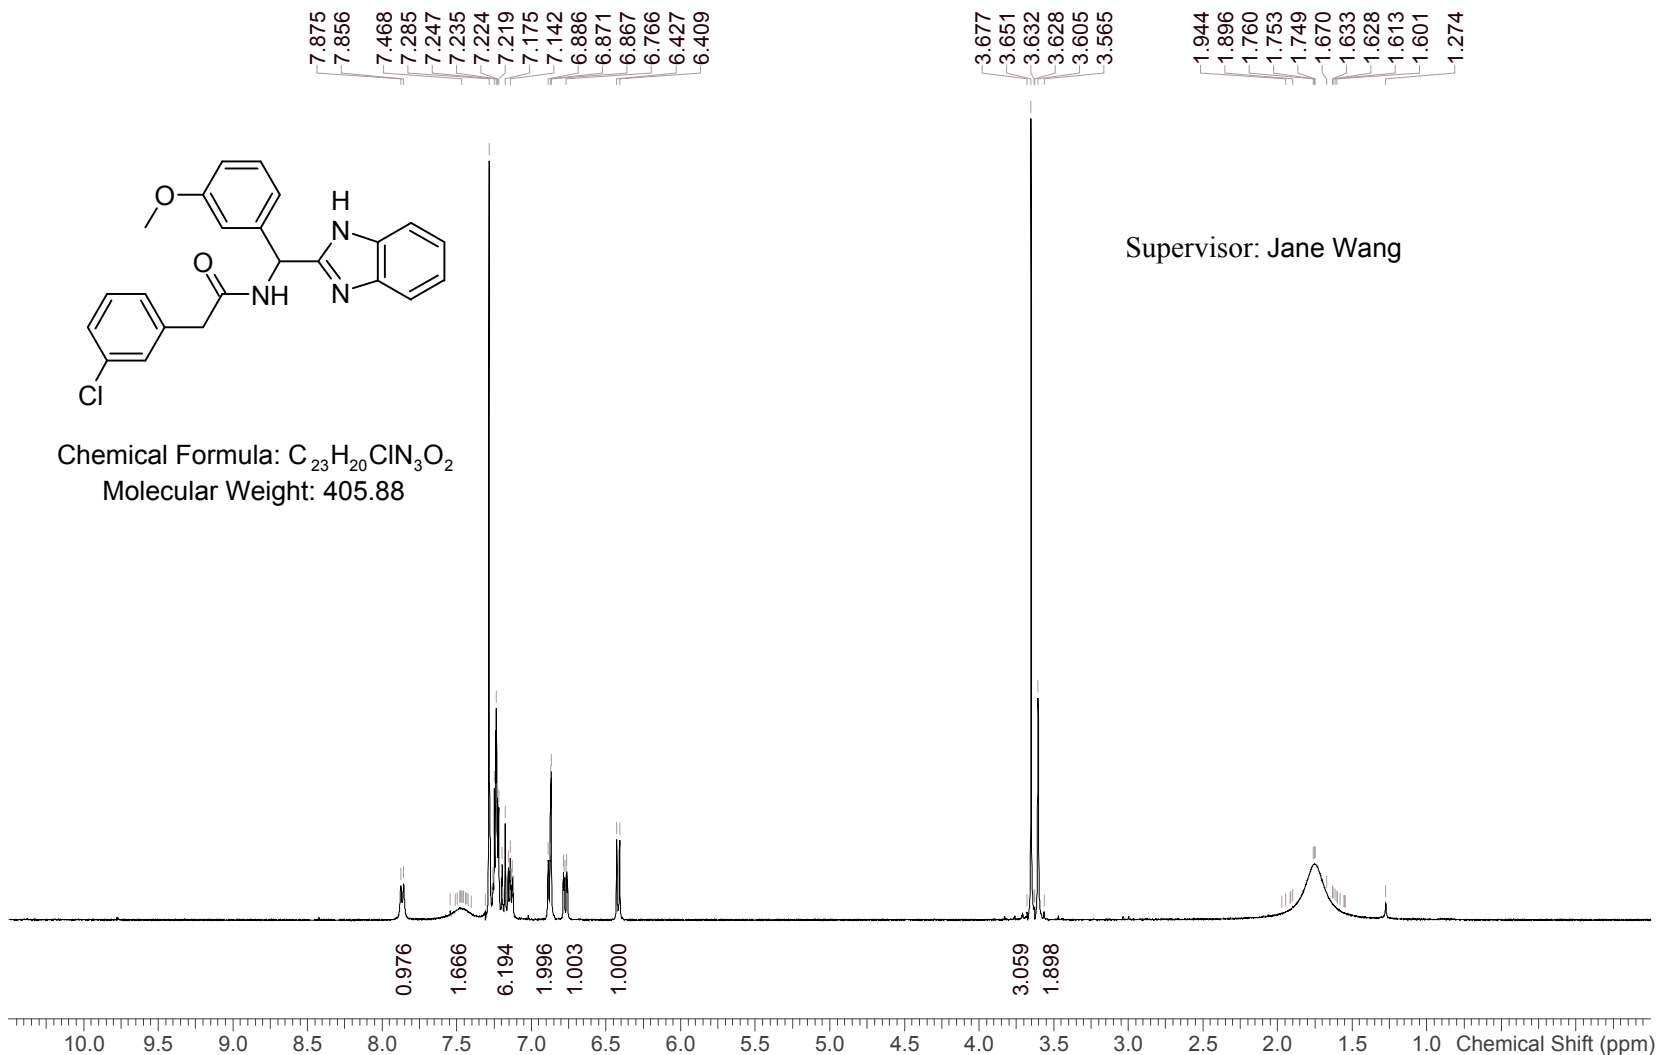

|                        |                                                                      |
|------------------------|----------------------------------------------------------------------|
| Acquisition Time (sec) | 1.9999                                                               |
| Comment                | EB2257-2<br>9-P1B<br>CDCl <sub>3</sub><br>Bruker_N<br>T-C_400M<br>Hz |
| Date                   | 03 Aug<br>2020<br>03:43:53                                           |
| Frequency (MHz)        | 400.1400                                                             |
| Nucleus                | <sup>1</sup> H                                                       |
| Number of Transients   | 8                                                                    |
| Origin                 | Avance                                                               |
| Original Points Count  | 16393                                                                |
| Owner                  | nmrsu                                                                |
| Points Count           | 65536                                                                |
| Pulse Sequence         | zg30                                                                 |
| Receiver Gain          | 101.00                                                               |
| SW(cyclical) (Hz)      | 8196.72                                                              |
| Solvent                | CHLORO<br>FORM-d                                                     |
| Spectrum Offset (Hz)   | 2400.8411                                                            |
| Spectrum Type          | standard                                                             |
| Sweep Width (Hz)       | 8196.60                                                              |
| Temperature (degree C) | 22.926                                                               |

<sup>1</sup>H NMR (400MHz, CHLOROFORM-d) δ = 7.87 (br d, J=7.5 Hz, 1H), 7.65 - 7.34 (m, 2H), 7.27 - 7.09 (m, 6H), 6.91 - 6.84 (m, 2H), 6.82 - 6.71 (m, 1H), 6.42 (d, J=7.5 Hz, 1H), 3.67 - 3.63 (m, 3H), 3.60 (s, 2H)

Confidential. For research only Not for regulatory filing

Operator:

Date:

## LCMS REPORT

Print time : 07/31/2020 10:38:12  
Compound ID : 1  
Sample ID : EB2257-29-P1J  
Injection Date : 7/31/2020 10:34:02 AM  
Injection Vol : 2ul  
Location : tray1 vail42  
Acq Method : 10-80AB\_4min\_220&254\_Shimadzu.lcm  
Org Data File : D:\DATA\2020\2007\200731\EB2257-29-P1J.lcd  
Instrument : LCMS\_01 1-2402 Shimadzu LCMS-2020  
Column : Xtimate C18,3um,2.1\*30mm  
Mobile phase : A) 0.04% TFA in H<sub>2</sub>O B) 0.02% TFA in ACN  
Gradient : 10% B increase to 80% B within 3min; hold at 80% B for 0.5min;  
then back to 10% B at 3.51min and hold for 0.49min.  
Flow rate 1.0 mL/min

Chromatogram

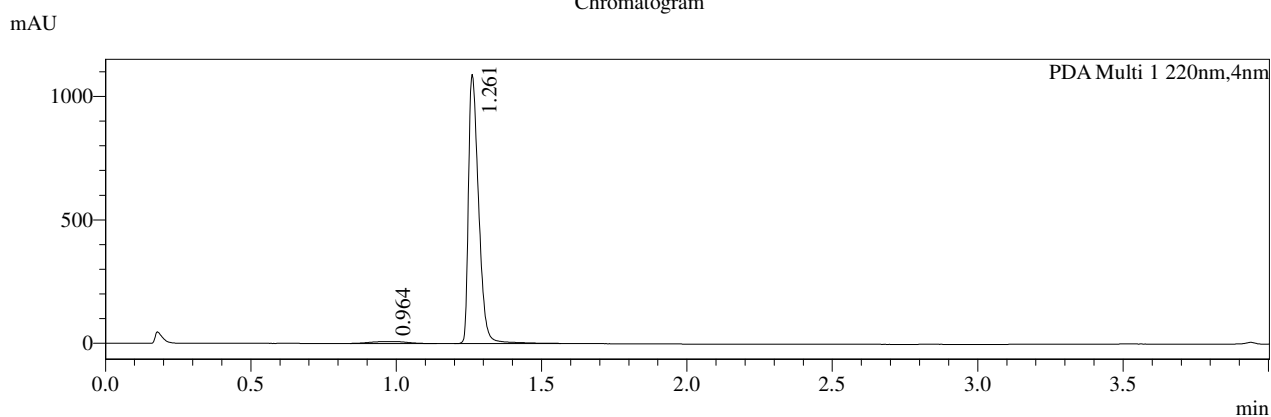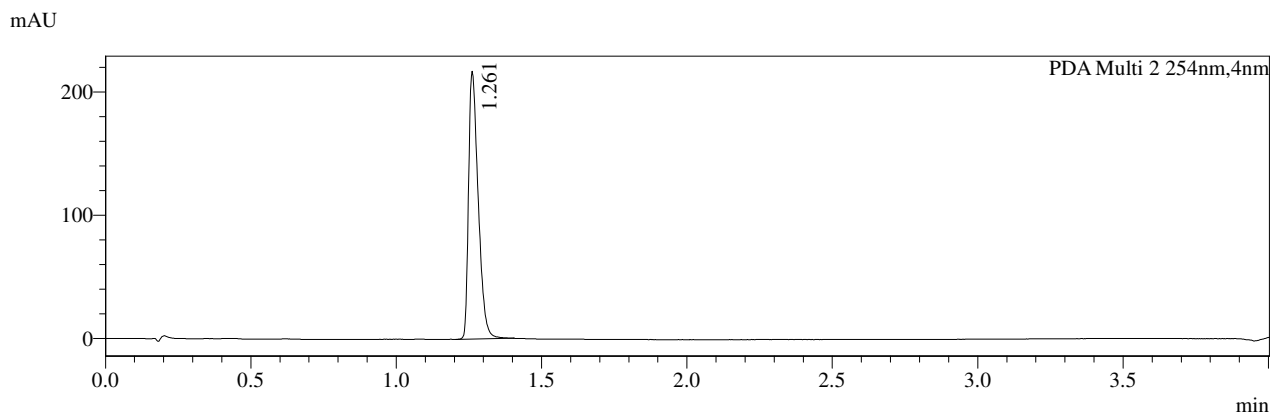

- 1 PDA Multi 1 / 220nm,4nm
- 2 PDA Multi 2 / 254nm,4nm

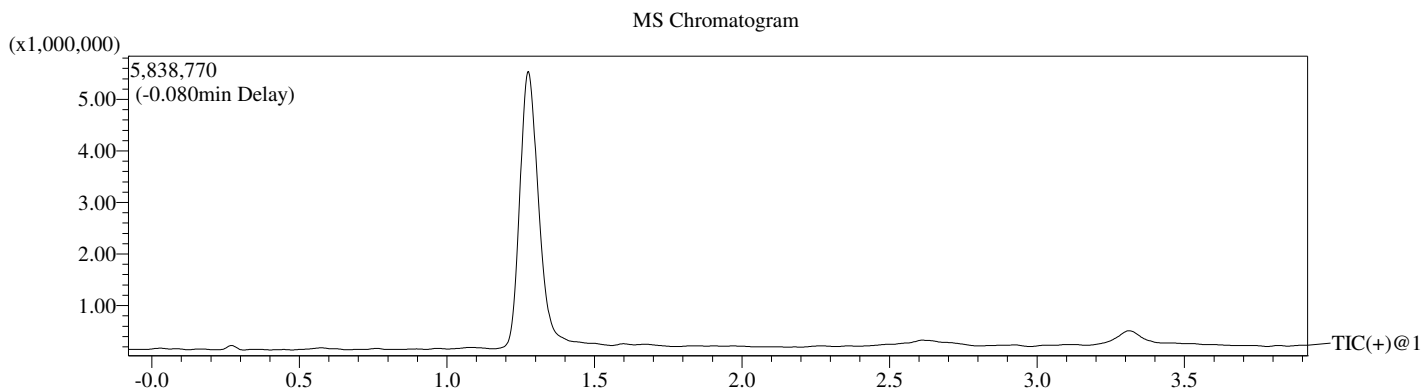

Integration Result

Peak Table

AD2

PDA Ch1 220nm

| Peak# | Ret. Time | Height  | Height% | USP Width | Area    | Area%  |
|-------|-----------|---------|---------|-----------|---------|--------|
| 1     | 0.964     | 7555    | 0.688   | 0.215     | 67159   | 2.475  |
| 2     | 1.261     | 1090429 | 99.312  | 0.066     | 2646582 | 97.525 |

PDA Ch2 254nm

| Peak# | Ret. Time | Height | Height% | USP Width | Area   | Area%   |
|-------|-----------|--------|---------|-----------|--------|---------|
| 1     | 1.261     | 217177 | 100.000 | 0.064     | 500360 | 100.000 |

Operator: \_\_\_\_\_

Date: \_\_\_\_\_

# Mass Spectrum

RefTime: 0.963 Datafile: D:\DATA\2020\2007\200731\EB2257-29-P1J.lcd

Intensity

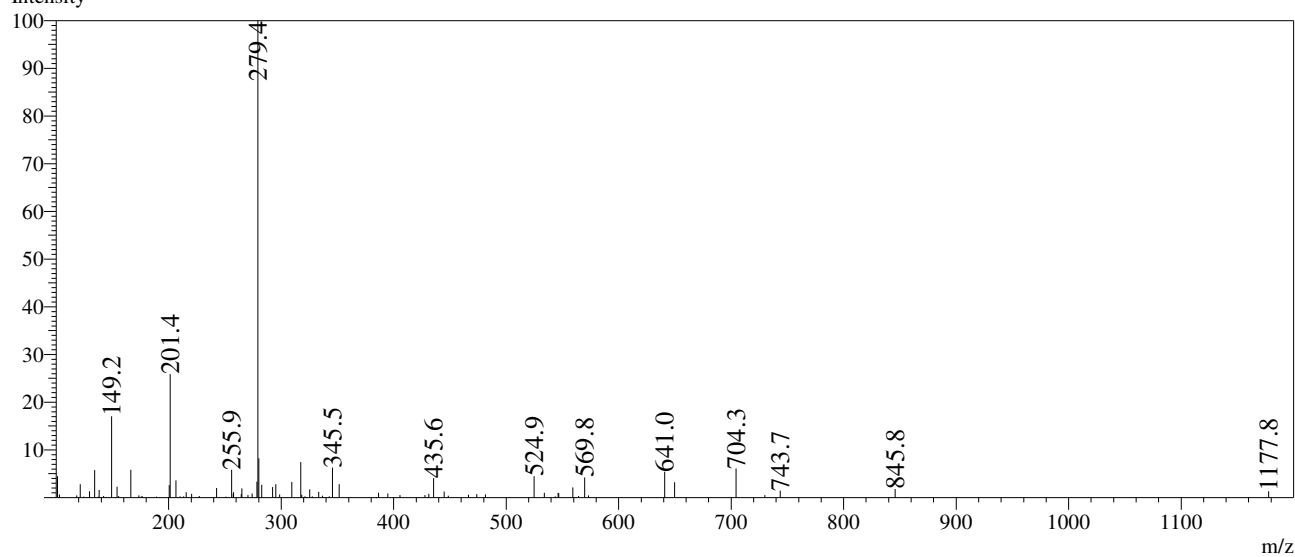

RefTime: 1.260 Datafile: D:\DATA\2020\2007\200731\EB2257-29-P1J.lcd

Intensity

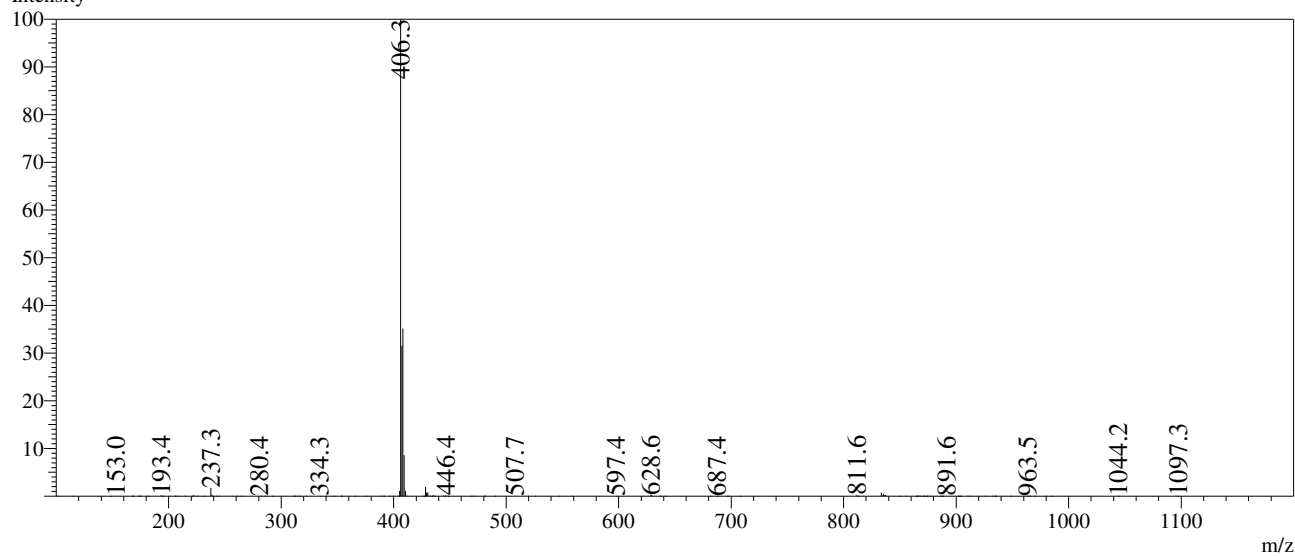

Supplement: d1cc00050k1.zip [file ALP-POS-ddb41b15-9.pdf › new_ESI/spectroscopic_data/compound4/ALP-POS-ddb41b15-9.pdf]
