# Supplementary material for: Discovery of SARS-CoV-2 main protease inhibitors using a synthesis-directed de novo design model
Source: Royal Society of Chemistry journal article supplement (doi:10.1039/d1cc00050k), 2021-01-01

# LCMS REPORT

Print time : 07/21/2020 12:30:46

Compound ID : 1  
Sample ID : EB2257-9-P1A1  
Injection Data : 12:28:24  
Injection Vol : 2ul  
Location : tray1 vail32  
Acq Method : D:\method\10-80AB\_2min\_220&254\_Shimadzu.lcm  
Org DataFile : D:\DATA\2020\2007\200721\EB2257-9-P1A1.lcd  
Instrument & column: LCMS-SAP 1-2402  
Xtimate C18, 3um,2.1\*30mm

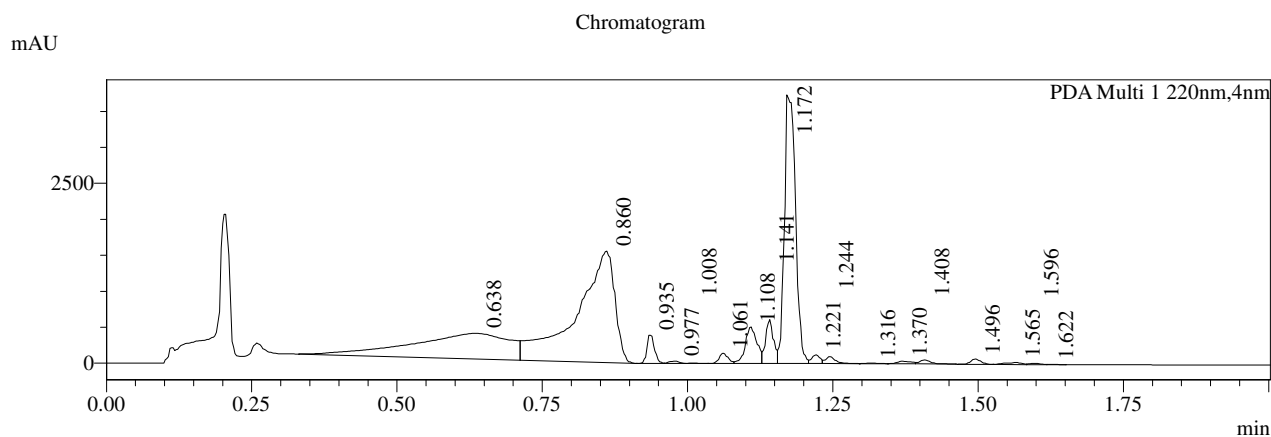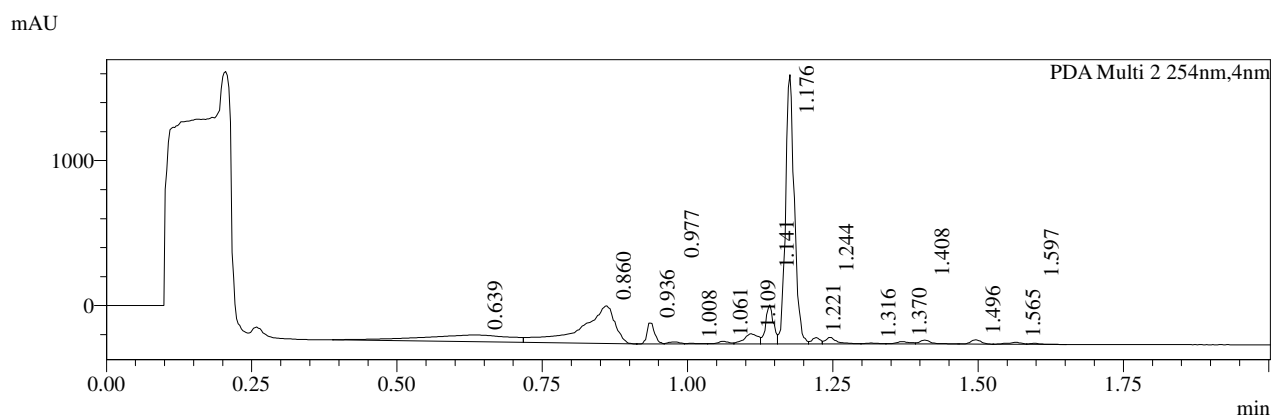

- 1 PDA Multi 1 / 220nm,4nm
- 2 PDA Multi 2 / 254nm,4nm

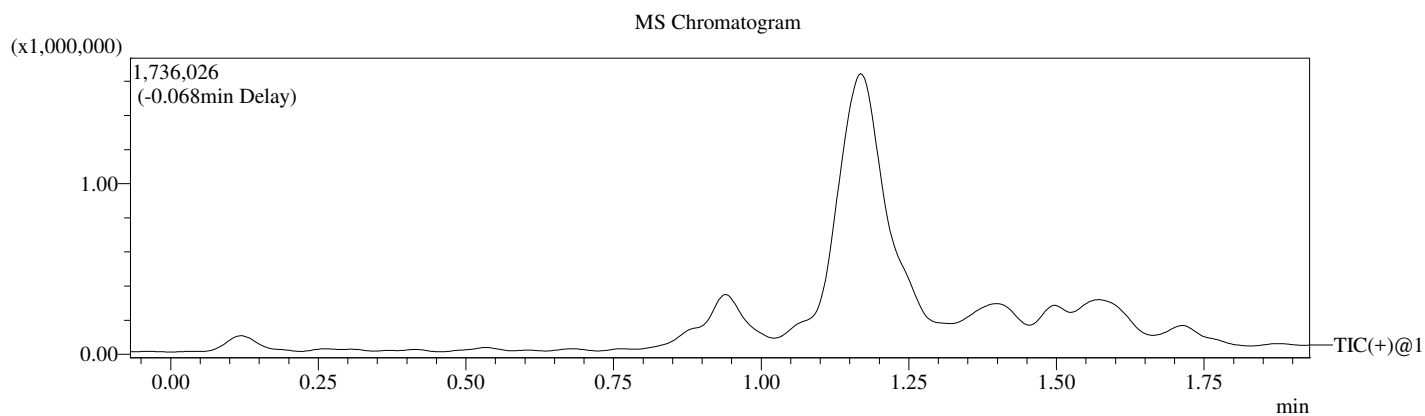

=====  
Integration Result  
=====

AD2

PDA Ch1 220nm

| Peak# | Ret. Time | Height  | Height% | USP Width | Area    | Area%  |
|-------|-----------|---------|---------|-----------|---------|--------|
| 1     | 0.638     | 355545  | 4.572   | 0.418     | 4099902 | 22.137 |
| 2     | 0.860     | 1548819 | 19.917  | 0.109     | 7060834 | 38.125 |
| 3     | 0.935     | 392469  | 5.047   | 0.026     | 354161  | 1.912  |
| 4     | 0.977     | 30171   | 0.388   | 0.036     | 38843   | 0.210  |
| 5     | 1.008     | 6277    | 0.081   | 0.037     | 7378    | 0.040  |
| 6     | 1.061     | 143086  | 1.840   | 0.033     | 156259  | 0.844  |
| 7     | 1.108     | 509594  | 6.553   | 0.044     | 720276  | 3.889  |
| 8     | 1.141     | 613605  | 7.891   | 0.027     | 581743  | 3.141  |
| 9     | 1.172     | 3733111 | 48.006  | 0.033     | 4950343 | 26.729 |
| 10    | 1.221     | 123328  | 1.586   | 0.037     | 120882  | 0.653  |
| 11    | 1.244     | 95042   | 1.222   | 0.038     | 112421  | 0.607  |
| 12    | 1.316     | 7522    | 0.097   | 0.037     | 8754    | 0.047  |
| 13    | 1.370     | 34375   | 0.442   | 0.057     | 58736   | 0.317  |
| 14    | 1.408     | 57640   | 0.741   | 0.041     | 75330   | 0.407  |
| 15    | 1.496     | 73402   | 0.944   | 0.037     | 89965   | 0.486  |
| 16    | 1.565     | 28834   | 0.371   | 0.059     | 56329   | 0.304  |
| 17    | 1.596     | 17441   | 0.224   | 0.042     | 22731   | 0.123  |
| 18    | 1.622     | 6028    | 0.078   | 0.043     | 5428    | 0.029  |

PDA Ch2 254nm

| Peak# | Ret. Time | Height  | Height% | USP Width | Area    | Area%  |
|-------|-----------|---------|---------|-----------|---------|--------|
| 1     | 0.639     | 46291   | 1.607   | 0.362     | 484095  | 11.300 |
| 2     | 0.860     | 260057  | 9.028   | 0.082     | 1028018 | 23.996 |
| 3     | 0.936     | 144706  | 5.023   | 0.026     | 133420  | 3.114  |
| 4     | 0.977     | 13955   | 0.484   | 0.039     | 19229   | 0.449  |
| 5     | 1.008     | 4399    | 0.153   | 0.061     | 7546    | 0.176  |
| 6     | 1.061     | 19200   | 0.667   | 0.040     | 25384   | 0.593  |
| 7     | 1.109     | 70596   | 2.451   | 0.056     | 118748  | 2.772  |
| 8     | 1.141     | 270126  | 9.377   | 0.028     | 252414  | 5.892  |
| 9     | 1.176     | 1856779 | 64.456  | 0.031     | 1955518 | 45.646 |
| 10    | 1.221     | 44691   | 1.551   | 0.038     | 44438   | 1.037  |
| 11    | 1.244     | 45836   | 1.591   | 0.038     | 63885   | 1.491  |
| 12    | 1.316     | 6651    | 0.231   | 0.069     | 12067   | 0.282  |
| 13    | 1.370     | 17310   | 0.601   | 0.044     | 29659   | 0.692  |
| 14    | 1.408     | 27890   | 0.968   | 0.040     | 37785   | 0.882  |
| 15    | 1.496     | 31197   | 1.083   | 0.037     | 37727   | 0.881  |
| 16    | 1.565     | 13154   | 0.457   | 0.046     | 22290   | 0.520  |
| 17    | 1.597     | 7865    | 0.273   | 0.038     | 11851   | 0.277  |

Operator:\_\_\_\_\_

Date:\_\_\_\_\_

# Mass Spectrum

RefTime: 0.638 Datafile: D:\DATA\2020\2007\200721\EB2257-9-P1A1.lcd

Intensity

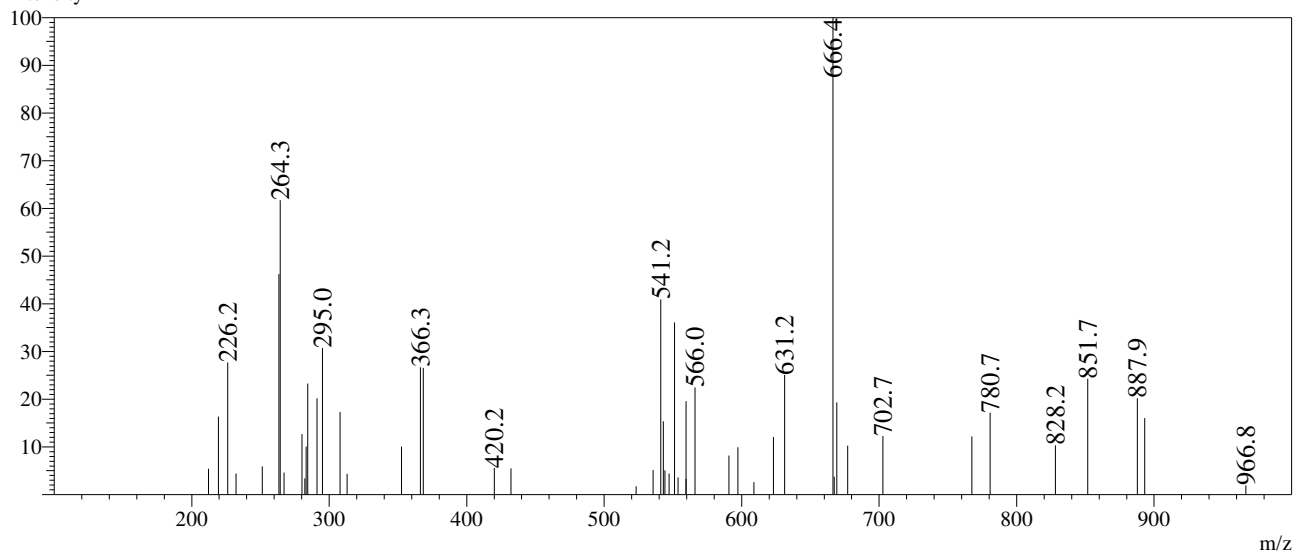

RefTime: 0.862 Datafile: D:\DATA\2020\2007\200721\EB2257-9-P1A1.lcd

Intensity

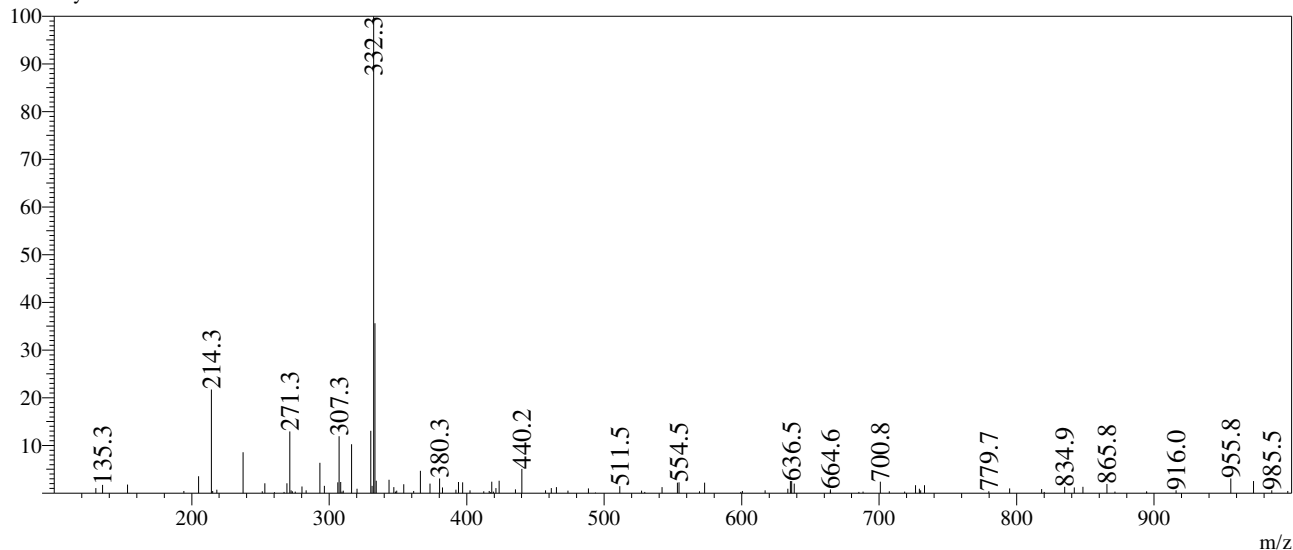

RefTime: 1.108 Datafile: D:\DATA\2020\2007\200721\EB2257-9-P1A1.lcd

Intensity

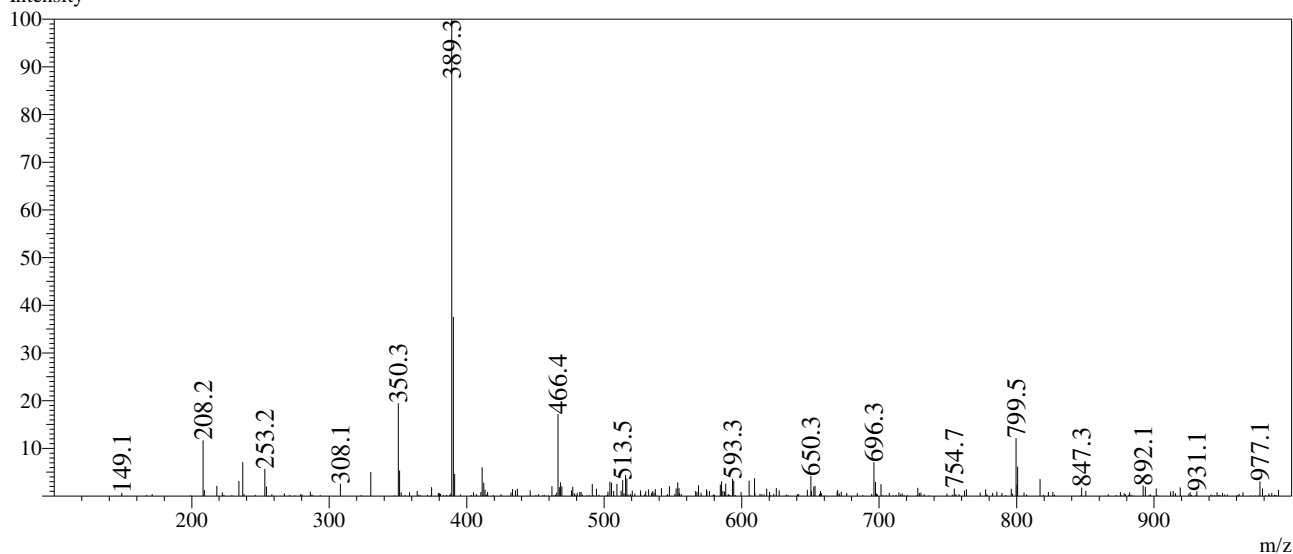

RefTime: 1.142 Datafile: D:\DATA\2020\2007\200721\EB2257-9-P1A1.lcd

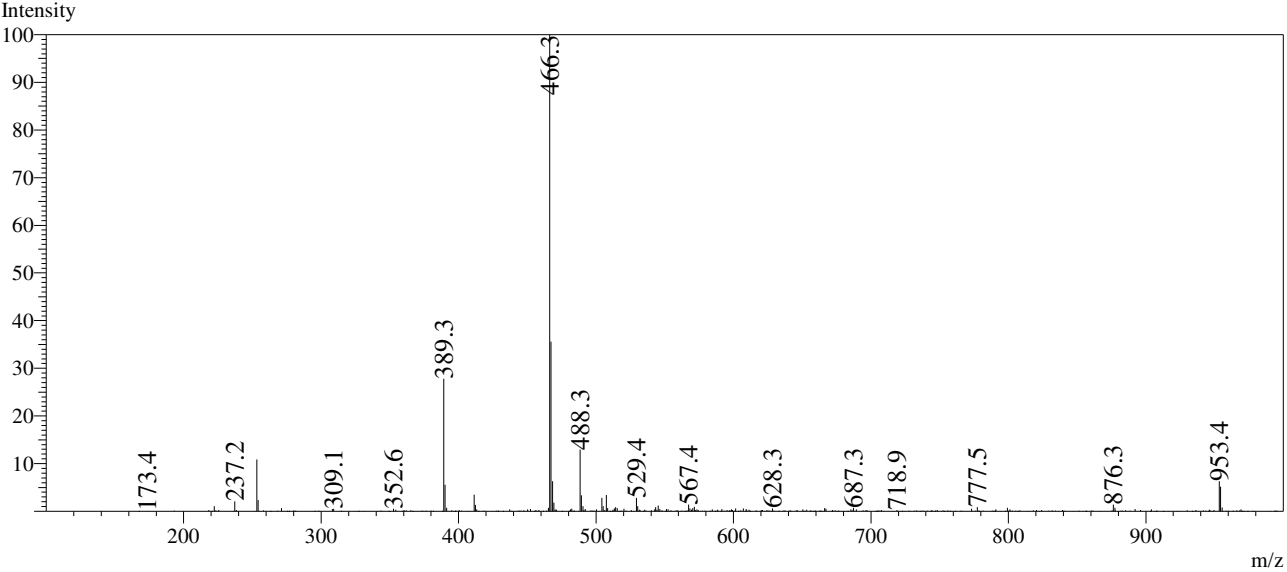

RefTime: 1.172 Datafile: D:\DATA\2020\2007\200721\EB2257-9-P1A1.lcd

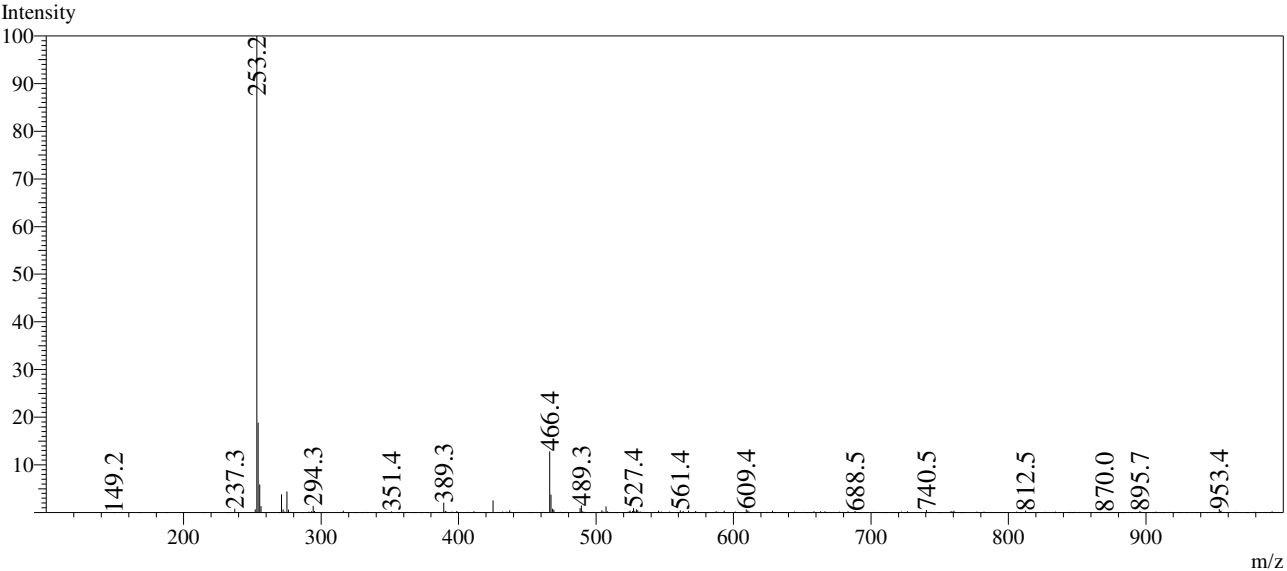

Supplement: d1cc00050k1.zip [file LC-MS_intermediate4.pdf › new_ESI/spectroscopic_data/compound4/LC-MS_intermediate4.pdf]
