# Supplementary material for: Discovery of SARS-CoV-2 main protease inhibitors using a synthesis-directed de novo design model
Source: Royal Society of Chemistry journal article supplement (doi:10.1039/d1cc00050k), 2021-01-01

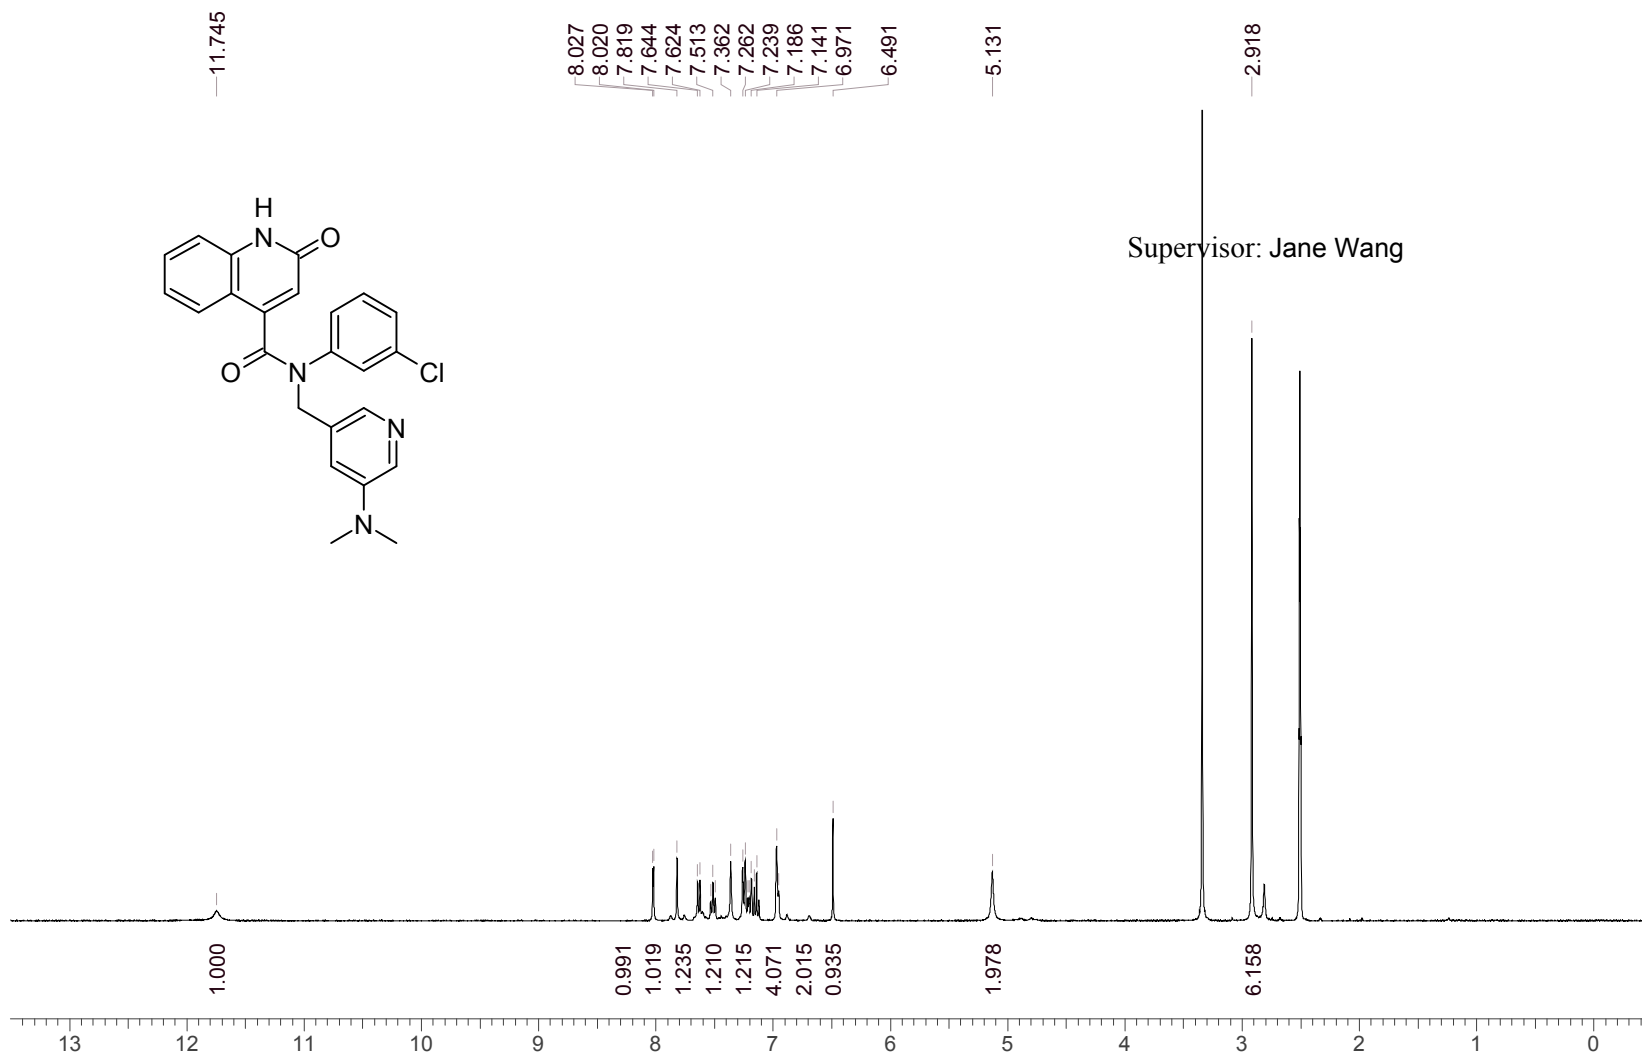

Acquisition Time (sec) 1.9999  
Comment EB2224-1  
94-P1A  
DMSO  
Bruker\_N  
T-C\_400M  
Hz  
Date 30 Oct  
2020  
01:26:16  
Frequency (MHz) 400.1400  
Nucleus 1H  
Number of Transients 8  
Origin Avance  
Original Points Count 16393  
Owner nmrsu  
Points Count 65536  
Pulse Sequence zg30  
Receiver Gain 101.00  
SW(cyclical) (Hz) 8196.72  
Solvent DMSO-d<sub>6</sub>  
Spectrum Offset (Hz) 2400.8411  
Spectrum Type standard  
Sweep Width (Hz) 8196.60  
Temperature (degree C) 22.764

<sup>1</sup>H NMR (400MHz, DMSO-d<sub>6</sub>) δ =  
11.74 (br s, 1H), 8.02 (d, *J*=2.8 Hz,  
1H), 7.82 (s, 1H), 7.63 (d, *J*=8.0 Hz,  
1H), 7.51 (t, *J*=7.4 Hz, 1H), 7.36 (s,  
1H), 7.28 - 7.12 (m, 4H), 7.00 - 6.93  
(m, 2H), 6.49 (s, 1H), 5.13 (br s,  
2H), 2.92 (s, 6H)

# LCMS REPORT

Print time : 10/29/2020 18:18:43  
Compound ID : ALP-POS-ddb41b15-3  
Sample ID : EB2224-194-P1B2  
Injection Date : 2020/10/29 18:14:28  
Injection Vol : 1ul  
Location : tray1 vail12  
Acq Method : 10-80CD\_4min\_Pos\_220&254\_Shimadzu.lcm  
Org Data File : D:\DATA\2020\2010\201029\EB2224-194-P1B2.lcd  
Instrument & column: LCMS\_02 1-2402  
XBridge Shield RP18, 5um,2.1\*50mm

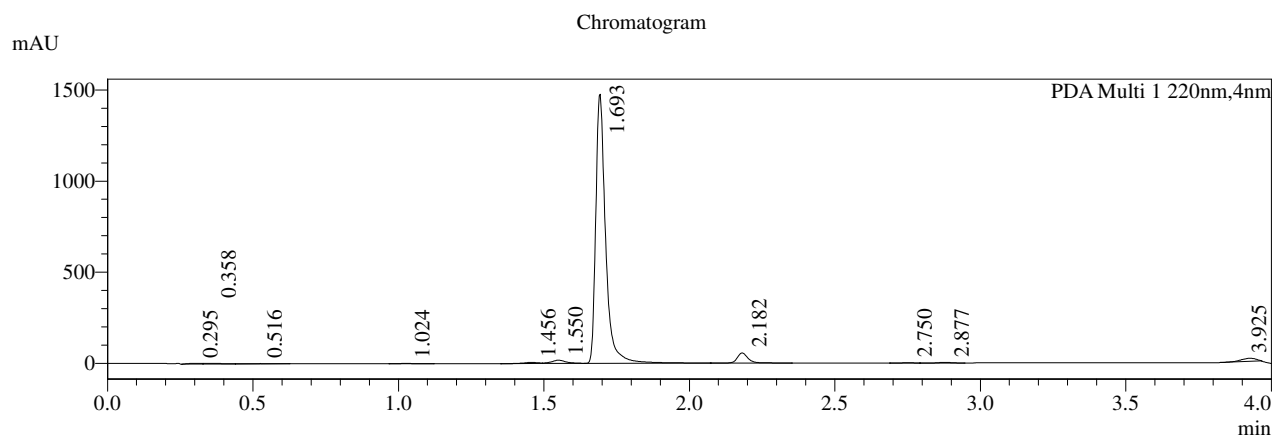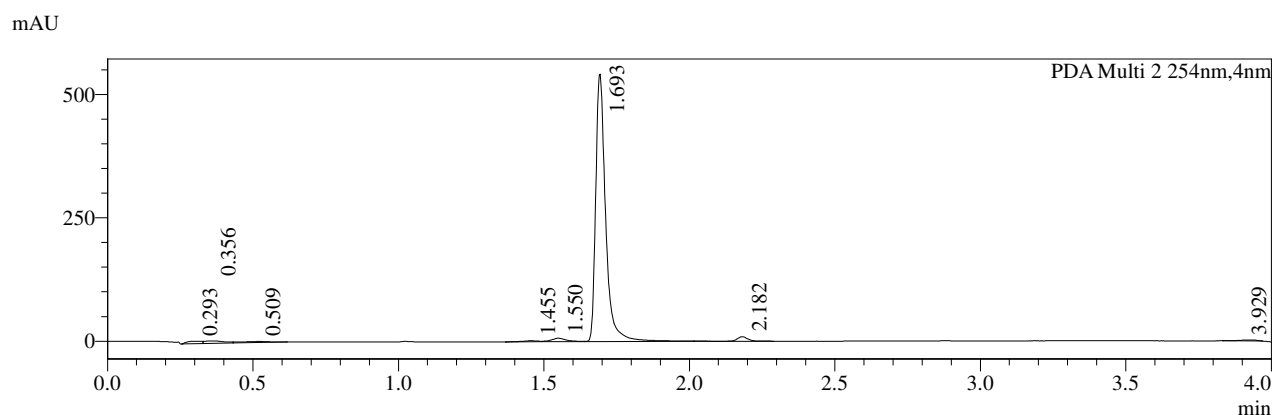

- 1 PDA Multi 1 / 220nm,4nm
- 2 PDA Multi 2 / 254nm,4nm

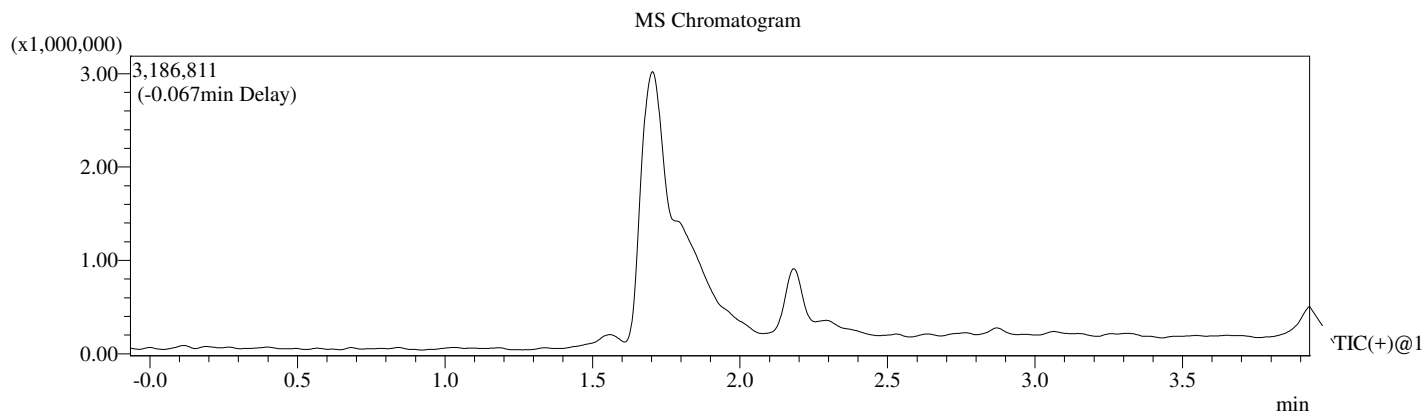

Integration Result

## PDA Ch1 220nm

| Peak# | Ret. Time | Height  | Height% | USP Width | Area    | Area%  |
|-------|-----------|---------|---------|-----------|---------|--------|
| 1     | 0.295     | 3459    | 0.220   | 0.271     | 11704   | 0.304  |
| 2     | 0.358     | 3930    | 0.251   | 0.218     | 17915   | 0.466  |
| 3     | 0.516     | 1837    | 0.117   | 0.396     | 11620   | 0.302  |
| 4     | 1.024     | 2573    | 0.164   | 0.061     | 6823    | 0.177  |
| 5     | 1.456     | 6449    | 0.411   | 0.103     | 23216   | 0.603  |
| 6     | 1.550     | 18245   | 1.163   | 0.090     | 65605   | 1.705  |
| 7     | 1.693     | 1455765 | 92.789  | 0.062     | 3488328 | 90.667 |
| 8     | 2.182     | 55029   | 3.507   | 0.068     | 146903  | 3.818  |
| 9     | 2.750     | 956     | 0.061   | 0.062     | 2205    | 0.057  |
| 10    | 2.877     | 3733    | 0.238   | 0.069     | 9303    | 0.242  |
| 11    | 3.925     | 16917   | 1.078   | 0.100     | 63793   | 1.658  |

## PDA Ch2 254nm

| Peak# | Ret. Time | Height | Height% | USP Width | Area    | Area%  |
|-------|-----------|--------|---------|-----------|---------|--------|
| 1     | 0.293     | 5005   | 0.881   | 0.294     | 17922   | 1.263  |
| 2     | 0.356     | 5233   | 0.921   | 0.278     | 24221   | 1.707  |
| 3     | 0.509     | 2378   | 0.419   | 0.427     | 17034   | 1.200  |
| 4     | 1.455     | 2044   | 0.360   | 0.116     | 7688    | 0.542  |
| 5     | 1.550     | 7051   | 1.242   | 0.091     | 25676   | 1.809  |
| 6     | 1.693     | 535285 | 94.252  | 0.062     | 1293487 | 91.132 |
| 7     | 2.182     | 9066   | 1.596   | 0.069     | 25815   | 1.819  |
| 8     | 3.929     | 1866   | 0.328   | 0.105     | 7506    | 0.529  |

Operator:\_\_\_\_\_

Date:\_\_\_\_\_

# Mass Spectrum

RefTime: 1.693 Datafile: D:\DATA\2020\2010\201029\EB2224-194-P1B2.lcd

Intensity

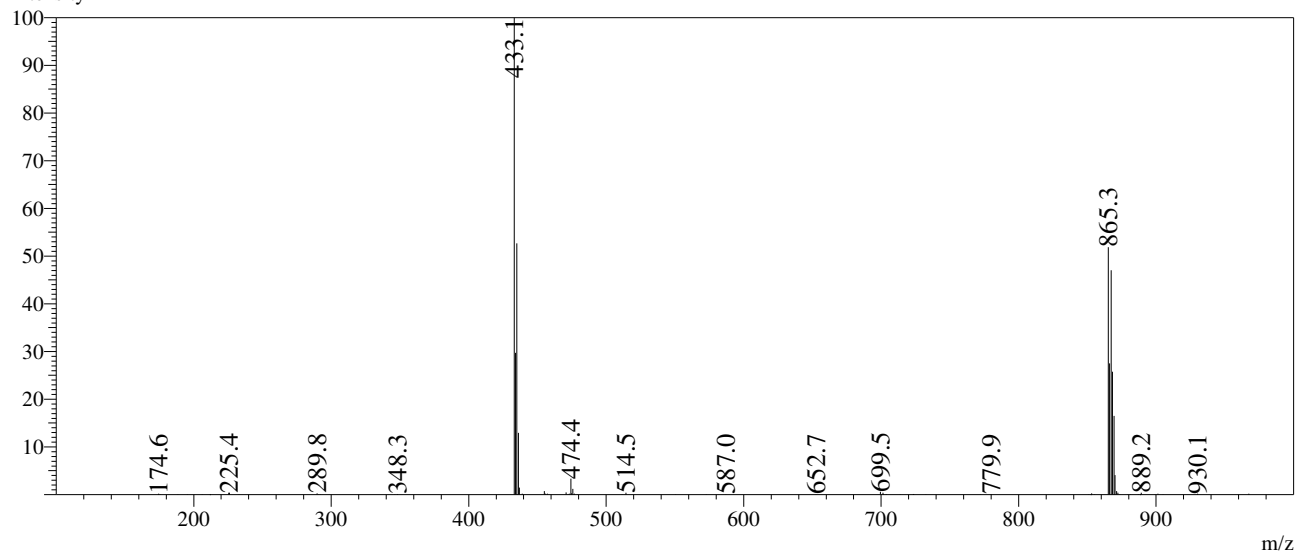

RefTime: 2.180 Datafile: D:\DATA\2020\2010\201029\EB2224-194-P1B2.lcd

Intensity

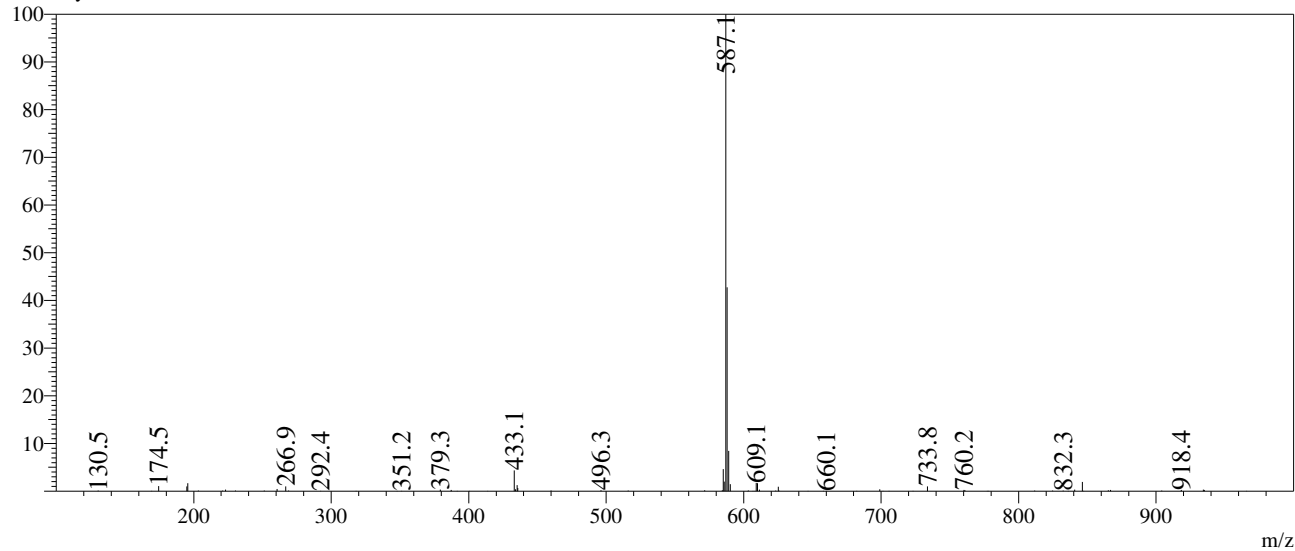

Supplement: d1cc00050k1.zip [file ALP-POS-ddb41b15-3.pdf › new_ESI/spectroscopic_data/compound3/ALP-POS-ddb41b15-3.pdf]
