# Supplementary material for: Discovery of SARS-CoV-2 main protease inhibitors using a synthesis-directed de novo design model
Source: Chem Commun (Camb). 2021 May 6;57(48):5909–12. doi: 10.1039/d1cc00050k (PMC8204246; doi:10.1039/d1cc00050k)
Supplement: CC-057-D1CC00050K-s075 [file CC-057-D1CC00050K-s075.xlsx]

## Sheet: Sheet1
Name	Institution(s)	Department	Address	email	ORCID
Matthew C. Robinson	PostEra Inc.	Technology	2 Embarcadero Center, 8th Floor, San Francisco, CA 94111, United States	matthew.robinson@postera.ai
Nir London	The Weizmann Institute of Science	Organic Chemistry	Hertzl 234 st. Rehovot, Israel, 7610001	nir.london@weizmann.ac.il	0000-0003-2687-0699
Efrat Resnick	The Weizmann Institute of Science	Organic Chemistry	Hertzl 234 st. Rehovot, Israel, 7610001	efrat.resnick@weizmann.ac.il
Daniel Zaidmann	The Weizmann Institute of Science	Organic Chemistry	Hertzl 234 st. Rehovot, Israel, 7610001	daniel.zaidman@weizmann.ac.il
Paul Gehrtz	The Weizmann Institute of Science	Organic Chemistry	Hertzl 234 st. Rehovot, Israel, 7610001	paul.gehrtz@weizmann.ac.il
Rambabu N. Reddi	The Weizmann Institute of Science	Organic Chemistry	Hertzl 234 st. Rehovot, Israel, 7610001	rambabu.reddi@weizmann.ac.il
Ronen Gabizon	The Weizmann Institute of Science	Organic Chemistry	Hertzl 234 st. Rehovot, Israel, 7610001	ronen.gabizon@weizmann.ac.il
Haim Barr	The Weizmann Institute of Science	Wohl Institute for Drug Discovery of the Nancy and Stephen Grand Israel National Center for Personalized Medicine	Hertzl 234 st. Rehovot, Israel, 7610001	haim.barr@weizmann.ac.il
Shirly Duberstein	The Weizmann Institute of Science	Wohl Institute for Drug Discovery of the Nancy and Stephen Grand Israel National Center for Personalized Medicine	Hertzl 234 st. Rehovot, Israel, 7610001	shirly.valter@weizmann.ac.il
Hadeer Zidane	The Weizmann Institute of Science	Wohl Institute for Drug Discovery of the Nancy and Stephen Grand Israel National Center for Personalized Medicine	Hertzl 234 st. Rehovot, Israel, 7610001	hadeer.zidane@weizmann.ac.il
Khriesto Shurrush	The Weizmann Institute of Science	Wohl Institute for Drug Discovery of the Nancy and Stephen Grand Israel National Center for Personalized Medicine	Hertzl 234 st. Rehovot, Israel, 7610001	khriesto.shurrush@weizmann.ac.il
Galit Cohen	The Weizmann Institute of Science	Wohl Institute for Drug Discovery of the Nancy and Stephen Grand Israel National Center for Personalized Medicine	Hertzl 234 st. Rehovot, Israel, 7610001	galit.cohen@weizmann.ac.il
Leonardo J. Solmesky	The Weizmann Institute of Science	Wohl Institute for Drug Discovery of the Nancy and Stephen Grand Israel National Center for Personalized Medicine	Hertzl 234 st. Rehovot, Israel, 7610001	leonardo.solmesky@weizmann.ac.il
Alpha Lee	PostEra Inc.; University of Cambridge			alpha.lee@postera.ai
Andrew Jajack	PostEra Inc.	Technology	2 Embarcadero Center, 8th Floor, San Francisco, CA 94111, United States	ajajack@gmail.com
Milan Cvitkovic	PostEra Inc.	Technology	2 Embarcadero Center, 8th Floor, San Francisco, CA 94111, United States	milan.cvitkovic@postera.ai
Jin Pan	PostEra Inc.	Technology	2 Embarcadero Center, 8th Floor, San Francisco, CA 94111, United States	jin.pan@postera.ai
Ruby Pai	PostEra Inc.	Technology	2 Embarcadero Center, 8th Floor, San Francisco, CA 94111, United States	ruby.pai@postera.ai
Tatiana Matviiuk	Enamine Ltd	Medicinal Chemistry	78 Chervonotkatska Street, 02094 Kyiv, Ukraine	t.matviyuk@enamine.net
Oleg Michurin	Enamine Ltd	Medicinal Chemistry	78 Chervonotkatska Street, 02094 Kyiv, Ukraine	o.michurin@enamine.net
Marian Gorichko	Taras Shevchenko National University of Kyiv	Organic Chemistry	Volodymyrska str. 64, 01033 Kyiv, Ukraine	417lab@gmail.com
Aarif Shaikh	Sai Life Sciences	Synthetic Chemistry		aarif.s@sailife.com
Jakir Pinjari	Sai Life Sciences	Synthetic Chemistry		jakir.p@sailife.com
Vishwanath Swamy	Sai Life Sciences	Synthetic Chemistry		vishwanath.s@sailife.com
Maneesh Pingle	Sai Life Sciences	Synthetic Chemistry		maneesh.p@sailife.com
Sarma BVNBS	Sai Life Sciences	Synthetic Chemistry		sarma.b@sailife.com
Anthony Aimon	Diamond Light Source Ltd; Research Complex at Harwell		Diamond Light Source, Harwell Science and Innovation Campus, Didcot, OX11 0DE, United Kingdom; Research Complex at Harwell, Harwell Science and Innovation Campus, Didcot OX11 0FA, United Kingdom	anthony.aimon@diamond.ac.uk	0000-0002-9135-129X
Frank von Delft	Diamond Light Source Ltd; University of Oxford; Research Complex at Harwell; University of Johannesburg		Diamond Light Source, Harwell Science and Innovation Campus, Didcot, OX11 0DE, United Kingdom; Centre for Medicine Discovery, Nuffield Department of Medicine, University of Oxford, Oxford, OX3 7DQ, United Kingdom; Research Complex at Harwell, Harwell Science and Innovation Campus, Didcot OX11 0FA, United Kingdom;Department of Biochemistry, University of Johannesburg, Auckland Park, 2006, South Af…	frank.von-delft@diamond.ac.uk	0000-0003-0378-0017
Daren Fearon	Diamond Light Source Ltd; Research Complex at Harwell	Life Sciences	Diamond Light Source, Harwell Science and Innovation Campus, Didcot, OX11 0DE, United Kingdom; Research Complex at Harwell, Harwell Science and Innovation Campus, Didcot OX11 0FA, United Kingdom	daren.fearon@diamond.ac.uk	0000-0003-3529-7863
Louise Dunnett	Diamond Light Source Ltd; Research Complex at Harwell	Life Sciences	Diamond Light Source, Harwell Science and Innovation Campus, Didcot, OX11 0DE, United Kingdom; Research Complex at Harwell, Harwell Science and Innovation Campus, Didcot OX11 0FA, United Kingdom	louise.dunnett@diamond.ac.uk
Alice Douangamath	Diamond Light Source Ltd; Research Complex at Harwell	Life Sciences	Diamond Light Source, Harwell Science and Innovation Campus, Didcot, OX11 0DE, United Kingdom; Research Complex at Harwell, Harwell Science and Innovation Campus, Didcot OX11 0FA, United Kingdom	alice.douangamath@diamond.ac.uk
Alex Dias	Diamond Light Source Ltd; Research Complex at Harwell	CEO	Diamond Light Source, Harwell Science and Innovation Campus, Didcot, OX11 0DE, United Kingdom; Research Complex at Harwell, Harwell Science and Innovation Campus, Didcot OX11 0FA, United Kingdom	alex.dias@diamond.ac.uk
Ailsa Powell	Diamond Light Source Ltd; Research Complex at Harwell	CEO	Diamond Light Source, Harwell Science and Innovation Campus, Didcot, OX11 0DE, United Kingdom; Research Complex at Harwell, Harwell Science and Innovation Campus, Didcot OX11 0FA, United Kingdom	ailsa.powell@diamond.ac.uk	0000-0002-0462-2240
Jose Brandao Neto	Diamond Light Source Ltd; Research Complex at Harwell	Life Sciences	Diamond Light Source, Harwell Science and Innovation Campus, Didcot, OX11 0DE, United Kingdom; Research Complex at Harwell, Harwell Science and Innovation Campus, Didcot OX11 0FA, United Kingdom	jose.brandao-neto@diamond.ac.uk	0000-0001-6015-320X
Rachael Skyner	Diamond Light Source Ltd; Research Complex at Harwell	Life Sciences	Diamond Light Source, Harwell Science and Innovation Campus, Didcot, OX11 0DE, United Kingdom; Research Complex at Harwell, Harwell Science and Innovation Campus, Didcot OX11 0FA, United Kingdom	rachael.skyner@diamond.ac.uk
Warren Thompson	Diamond Light Source Ltd; Research Complex at Harwell	Life Sciences	Diamond Light Source, Harwell Science and Innovation Campus, Didcot, OX11 0DE, United Kingdom; Research Complex at Harwell, Harwell Science and Innovation Campus, Didcot OX11 0FA, United Kingdom	warren.thompson@diamond.ac.uk	0000-0003-1474-7810
Tyler Gorrie-Stone	Diamond Light Source Ltd; Research Complex at Harwell	Life Sciences	Diamond Light Source, Harwell Science and Innovation Campus, Didcot, OX11 0DE, United Kingdom; Research Complex at Harwell, Harwell Science and Innovation Campus, Didcot OX11 0FA, United Kingdom	tyler.gorrie-stone@diamond.ac.uk	0000-0002-1817-1495
Martin Walsh	Diamond Light Source Ltd; Research Complex at Harwell	Life Sciences	Diamond Light Source, Harwell Science and Innovation Campus, Didcot, OX11 0DE, United Kingdom; Research Complex at Harwell, Harwell Science and Innovation Campus, Didcot OX11 0FA, United Kingdom	martin.walsh@diamond.ac.uk
David Owen	Diamond Light Source Ltd; Research Complex at Harwell	Life Sciences	Diamond Light Source, Harwell Science and Innovation Campus, Didcot, OX11 0DE, United Kingdom; Research Complex at Harwell, Harwell Science and Innovation Campus, Didcot OX11 0FA, United Kingdom	david.owen@diamond.ac.uk
Petra Lukacik	Diamond Light Source Ltd; Research Complex at Harwell	Life Sciences	Diamond Light Source, Harwell Science and Innovation Campus, Didcot, OX11 0DE, United Kingdom; Research Complex at Harwell, Harwell Science and Innovation Campus, Didcot OX11 0FA, United Kingdom	petra.lukacik@diamond.ac.uk
Claire Strain-Damerell	Diamond Light Source Ltd; Research Complex at Harwell	Life Sciences	Diamond Light Source, Harwell Science and Innovation Campus, Didcot, OX11 0DE, United Kingdom; Research Complex at Harwell, Harwell Science and Innovation Campus, Didcot OX11 0FA, United Kingdom	claire.strain-damerell@diamond.ac.uk
Halina Mikolajek	Diamond Light Source Ltd; Research Complex at Harwell	Life Sciences	Diamond Light Source, Harwell Science and Innovation Campus, Didcot, OX11 0DE, United Kingdom; Research Complex at Harwell, Harwell Science and Innovation Campus, Didcot OX11 0FA, United Kingdom	halina.mikolajek@diamond.ac.uk
Sam Horrell	Diamond Light Source Ltd; Research Complex at Harwell	Life Sciences	Diamond Light Source, Harwell Science and Innovation Campus, Didcot, OX11 0DE, United Kingdom; Research Complex at Harwell, Harwell Science and Innovation Campus, Didcot OX11 0FA, United Kingdom	sam.horrell@diamond.ac.uk
Lizbé Koekemoer	University of Oxford	Nuffield Department of Medicine	Centre for Medicines Discovery, University of Oxford, ORCRB, Roosevelt Drive, Oxford, Oxon, OX3 7DQ, UK	lizbe.koekemoer@cmd.ox.ac.uk	0000-0001-9226-9127
Tobias Krojer	University of Oxford	Nuffield Department of Medicine	Centre for Medicines Discovery, University of Oxford, ORCRB, Roosevelt Drive, Oxford, Oxon, OX3 7DQ, UK	tobias.krojer@cmd.ox.ac.uk	0000-0003-0661-0814
Mike Fairhead	University of Oxford	Nuffield Department of Medicine	Centre for Medicines Discovery, University of Oxford, ORCRB, Roosevelt Drive, Oxford, Oxon, OX3 7DQ, UK	michael.fairhead@cmd.ox.ac.uk	0000-0001-5361-3933
Beth MacLean	University of Oxford	Nuffield Department of Medicine	Centre for Medicines Discovery, University of Oxford, ORCRB, Roosevelt Drive, Oxford, Oxon, OX3 7DQ, UK	beth.maclean@cmd.ox.ac.uk
Andrew Thompson	University of Oxford	Nuffield Department of Medicine	Centre for Medicines Discovery, University of Oxford, ORCRB, Roosevelt Drive, Oxford, Oxon, OX3 7DQ, UK	andrew.thompson@cmd.ox.ac.uk	0000-0002-3910-2317
Conor Francis Wild	University of Oxford	Nuffield Department of Medicine	Centre for Medicines Discovery, University of Oxford, ORCRB, Roosevelt Drive, Oxford, Oxon, OX3 7DQ, UK	conor.wild@cmd.ox.ac.uk	0000-0003-0654-8141
Mihaela D. Smilova	University of Oxford	Nuffield Department of Medicine	Centre for Medicines Discovery, University of Oxford, ORCRB, Roosevelt Drive, Oxford, Oxon, OX3 7DQ, UK	mihaela.smilova@cmd.ox.ac.uk	0000-0001-6255-7312
Nathan Wright	University of Oxford	Nuffield Department of Medicine	Centre for Medicines Discovery, University of Oxford, ORCRB, Roosevelt Drive, Oxford, Oxon, OX3 7DQ, UK	nathan.wright@cmd.ox.ac.uk
Annette von Delft	University of Oxford	Nuffield Department of Medicine	Centre for Medicines Discovery, University of Oxford, ORCRB, Roosevelt Drive, Oxford, Oxon, OX3 7DQ, UK	annette.vondelft@cmd.ox.ac.uk	0000-0002-7699-8140
Carina Gileadi	University of Oxford	Nuffield Department of Medicine	Centre for Medicines Discovery, University of Oxford, ORCRB, Roosevelt Drive, Oxford, Oxon, OX3 7DQ, UK	carina.gileadi@cmd.ox.ac.uk
Victor L. Rangel	School of Pharmaceutical Sciences of Ribeirao Preto	Pharmaceutical Sciences	Avenida do Café, s/nºRibeirão Preto - SP/CEP 14040-903	victor.rangel@usp.br	0000-0002-7580-3452
Chris Schofield	University of Oxford	Department of Chemistry	Chemistry Research Laboratory, 12 Mansfield Rd, Oxford OX1 3TA, United Kingdom	christopher.schofield@chem.ox.ac.uk	0000-0002-0290-6565
Tika R. Malla	University of Oxford	Department of Chemistry	Chemistry Research Laboratory, 12 Mansfield Rd, Oxford OX1 3TA, United Kingdom	tika.malla@chem.ox.ac.uk	0000-0003-4989-6410
Anthony Tumber	University of Oxford	Department of Chemistry	Chemistry Research Laboratory, 12 Mansfield Rd, Oxford OX1 3TA, United Kingdom	anthony.tumber@chem.ox.ac.uk
Tobias John	University of Oxford	Department of Chemistry	Chemistry Research Laboratory, 12 Mansfield Rd, Oxford OX1 3TA, United Kingdom	tobias.john@chem.ox.ac.uk
Ioannis Vakonakis	University of Oxford	Department of Biochemistry	South Parks Road, Oxford OX1 3QU	ioannis.vakonakis@bioch.ox.ac.uk	0000-0002-4726-0446
Anastassia L. Kantsadi	University of Oxford	Department of Biochemistry	Oxford Glycobiology Institute; South Parks Road, Oxford OX1 3QU	anastassia.kantsadi@bioch.ox.ac.uk
Nicole Zitzmann	University of Oxford	Department of Biochemistry	Oxford Glycobiology Institute; South Parks Road, Oxford OX1 3QU	nicole.zitzmann@bioch.ox.ac.uk	0000-0003-1969-4949
Juliane Brun	University of Oxford	Department of Biochemistry	Oxford Glycobiology Institute; South Parks Road, Oxford OX1 3QU	juliane.brun@path.ox.ac.uk	0000-0002-0964-3681
J. L. Kiappes	University of Oxford	Department of Biochemistry	Oxford Glycobiology Institute; South Parks Road, Oxford OX1 3QU	john.kiappes@bioch.ox.ac.uk	0000-0001-6697-6776
Michelle Hill	University of Oxford	Department of Biochemistry	Oxford Glycobiology Institute; South Parks Road, Oxford OX1 3QU	michelle.hill@bioch.ox.ac.uk	0000-0002-9289-5811
Finny S. Varghese	Radboud University Medical Center	Department of Medical Microbiology	Radboud Institute for Molecular Life Sciences, Radboud University Medical Center, Geert Grooteplein Zuid 28, 6525 GA Nijmegen, The Netherlands	finny.varghese@radboudumc.nl	0000-0002-7900-5482
Ronald P. van Rij	Radboud University Medical Center	Department of Medical Microbiology	Radboud Institute for Molecular Life Sciences, Radboud University Medical Center, Geert Grooteplein Zuid 28, 6525 GA Nijmegen, The Netherlands	ronald.vanrij@radboudumc.nl	0000-0003-0221-4689
Gijs J. Overheul	Radboud University Medical Center	Department of Medical Microbiology	Radboud Institute for Molecular Life Sciences, Radboud University Medical Center, Geert Grooteplein Zuid 28, 6525 GA Nijmegen, The Netherlands	Gijs.Overheul@radboudumc.nl	0000-0002-8356-8165
Susana Tomásio	Collaborative Drug Discovery		20 Station Rd, Cambridge, CB1 2JD, UK	Stomasio@collaborativedrug.com
Charlie Weatherall	Collaborative Drug Discovery		1633 Bayshore Hwy, Burlingame, CA 94010, USA	cweatherall@collaborativedrug.com
Mariana Vaschetto	Collaborative Drug Discovery		20 Station Rd, Cambridge CB1 2JD, UK	mariana@collaborativedrug.com
Hannah Bruce Macdonald	Memorial Sloan Kettering Cancer Center	Computational and Systems Biology Program	1275 York Ave, New York, NY 10065	hannah.brucemacdonald@choderalab.org	0000-0002-5562-6866
John D. Chodera	Memorial Sloan Kettering Cancer Center	Computational and Systems Biology Program	1275 York Ave, New York, NY 10065	john.chodera@choderalab.org	0000-0003-0542-119X
Dominic Rufa	Memorial Sloan Kettering Cancer Center	Computational and Systems Biology Program	1275 York Ave, New York, NY 10065	dominic.rufa@choderalab.org	0000-0003-0930-9445
Matthew Wittmann	Memorial Sloan Kettering Cancer Center	Computational and Systems Biology Program	1275 York Ave, New York, NY 10065	matt.wittmann@choderalab.org
Melissa L. Boby	Memorial Sloan Kettering Cancer Center;Weil Cornell Medical College	Weil Cornell Graduate School of Medical Sciences	1275 York Ave, New York, NY 10065	melissa.boby@choderalab.org	0000-0003-1920-206X
William G. Glass	Memorial Sloan Kettering Cancer Center	Computational and Systems Biology Program	1275 York Ave, New York, NY 10065	william.glass@choderalab.org	0000-0002-4099-9280
Peter K. Eastman	Department of Bioengineering until Sept. 1, then Department of Chemistry	Stanford University	11 Mill Site Road, Scotts Valley, CA 95066	peastman@stanford.edu	0000-0002-9566-9684
Joseph E. Coffland	N/A	Cauldron Development LLC	523 6th Street, Petaluma, CA 94952	joseph@cauldrondevelopment.com	0000-0002-1833-5437
Ed J. Griffen	MedChemica Ltd	Research and Development	Alderley Park, Macclesfield, Cheshire. SK10 4TG UK.	ed.griffen@medchemica.com	0000-0003-0859-554X
Willam McCorkindale	University of Cambridge	Cavendish Laboratory	19 JJ Thomson Avenue, Cambridge, CB3 0HE UK
Aaron Morris	PostEra Inc	CEO	2 Embarcadero Center, 8th Floor, San Francisco, CA 94111, United States	aaron.morris@postera.ai
Robert Glen	University of Cambridge	Department of Chemistry	Lensfield Road, Cambridge, CB21EW, United Kingdom	rcg28@cam.ac.uk
Jason Cole	Cambridge Crystallographic Datacentre		12 Union Road, Cambridge, CB2 1EZ, United Kingdom	cole@ccdc.cam.ac.uk
Richard Foster	University of Leeds	School of Chemistry	Leeds, LS2 9JT, United Kingdom	R.Foster@leeds.ac.uk
Holly Foster	University of Leeds	School of Chemistry	Leeds, LS2 9JT, United Kingdom	cm13hf@leeds.ac.uk
Mark Calmiano	UCB		216 Bath Road, Slough, SL1 3WE, United Kingdom	mark.calmiano@ucb.com
Rachael Tennant	Lhasa Ltd. UK		Granary Wharf House, 2 Canal Wharf, Holbeck, Leeds LS11 5PS, United Kingdom	Rachael.Tennant@lhasalimited.org
Jag Heer	UCB		216 Bath Road, Slough, SL1 3WE, United Kingdom	jag.heer@ucb.com
Jiye Shi	UCB		216 Bath Road, Slough, SL1 3WE, United Kingdom	jiye.shi@ucb.com
Eric Jnoff	UCB		Chemin du Foriest, 1420 Braine-l'Alleud, Belgium	eric.jnoff@ucb.com
Matthew F.D. Hurley	Temple University	Department of Chemistry	1901 N 13th st. Philadelphia, PA 19122	matthew.hurley@temple.edu
Bruce A. Lefker	Thames Pharma Partners LLC		1 Conrad Street, Mystic, CT 06355, USA	bruce.lefker@thamespharmapartners.com	0000-0003-0859-6956
Ralph P. Robinson	Thames Pharma Partners LLC		1 Conrad Street, Mystic, CT 06355, USA	ralph.p.robinson@thamespharmapartners.com
Charline Giroud	University of Oxford	Nuffield Department of Medicine	Centre for Medicines Discovery & Target Discovery Institute, University of Oxford, Oxford OX3 7FZ, UK	charline.giroud@cmd.ox.ac.uk
James Bennett	University of Oxford	Nuffield Department of Medicine	Centre for Medicines Discovery & Target Discovery Institute, University of Oxford, Oxford OX3 7FZ, UK	james.bennett@cmd.ox.ac.uk
Oleg Fedorov	University of Oxford	Nuffield Department of Medicine	Centre for Medicines Discovery & Target Discovery Institute, University of Oxford, Oxford OX3 7FZ, UK	oleg.fedorov@cmd.ox.ac.uk
St Patrick Reid	Department of Pathology and Microbiology	University of Nebraska Medical Centre	985900 Nebraska Medical Center, Omaha, NE 68198-5900, USA	patrick.reid@unmc.edu
Melody Jane Morwitzer	Department of Pathology and Microbiology	University of Nebraska Medical Centre	985900 Nebraska Medical Center, Omaha, NE 68198-5900, USA
Lisa Cox	Life Compass Consulting Ltd	Project Management	26 Millers Meadow, Rainow, Macclesfield. SK10 5UE	lisa@lifecompassconsulting.co.uk
Garrett M. Morris	University of Oxford	Department of Statistics	24-29 St Giles', Oxford OX1 3LB, UK	morris@stats.ox.ac.uk	0000-0003-1731-8405
Matteo Ferla	University of Oxford	Nuffield Department of Medicine	Wellcome Centre for Human Genetics, Roosevelt Drive, Oxford OX3 7BN, UK	matteo@well.ox.ac.uk
Demetri Moustakas	Relay Therapeutics			dmoustakas@relaytx.com
Tim Dudgeon	Informatics Matters			tdudgeon@informaticsmatters.com
Vladimír Pšenák	M2M solutions, s.r.o		Vysokoškolákov 1757/1, 010 01 Žilina, Slovenská republika	vladimir.psenak@m2ms.sk
Boris Kovar	M2M solutions, s.r.o		Vysokoškolákov 1757/1, 010 01 Žilina, Slovenská republika	boris.kovar@m2ms.sk
Vincent Voelz	Temple University			voelz@temple.edu
Warren Thompson	Diamond Light Source Ltd; Research Complex at Harwell		Diamond Light Source, Harwell Science and Innovation Campus, Didcot, OX11 0DE, United Kingdom; Research Complex at Harwell, Harwell Science and Innovation Campus, Didcot OX11 0FA, United Kingdom	warren.thompson@diamond.ac.uk
Anna Carbery	University of Oxford;Diamond Light Source	Department of Statistics	24-29 St Giles', Oxford OX1 3LB, UK; Diamond Light Source, Harwell Science and Innovation Campus, Didcot, OX11 0DE, United Kingdom	anna.carbery@lmh.ox.ac.uk
Alessandro Contini	University of Milan	DISFARM - Sezione di Chimica Generale e Organica "Alessandro Marchesini"	Via Venezian, 21 20133 Milano	Alessandro.Contini@unimi.it
Austin Clyde	Argonne National Laboratory			aclyde@anl.gov
Amir Ben-Shmuel	Israel Institution of Biological Research		Ness-Ziona, Israel	amirb@iibr.gov.il
Assa Sittner	Israel Institution of Biological Research		Ness-Ziona, Israel	assas@iibr.gov.il
Boaz Politi	Israel Institution of Biological Research		Ness-Ziona, Israel	boazp@iibr.gov.il
Einat B. Vitner	Israel Institution of Biological Research		Ness-Ziona, Israel	einatv@iibr.gov.il
Elad Bar-David	Israel Institution of Biological Research		Ness-Ziona, Israel	eladb@iibr.gov.il
Hadas Tamir	Israel Institution of Biological Research		Ness-Ziona, Israel	hadast@iibr.gov.il
Hagit Achdout	Israel Institution of Biological Research		Ness-Ziona, Israel	hagita@iibr.gov.il
Haim Levy	Israel Institution of Biological Research		Ness-Ziona, Israel	haiml@iibr.gov.il
Itai Glinert	Israel Institution of Biological Research		Ness-Ziona, Israel	itaig@iibr.gov.il
Nir Paran	Israel Institution of Biological Research		Ness-Ziona, Israel	nirp@iibr.gov.il
Noam Erez	Israel Institution of Biological Research		Ness-Ziona, Israel	noame@iibr.gov.il
Reut Puni	Israel Institution of Biological Research		Ness-Ziona, Israel	reutp@iibr.gov.il
Sharon Melamed	Israel Institution of Biological Research		Ness-Ziona, Israel	sharonm@iibr.gov.il
Shay Weiss	Israel Institution of Biological Research		Ness-Ziona, Israel	shayw@iibr.gov.il
Tomer Israely	Israel Institution of Biological Research		Ness-Ziona, Israel	tomeri@iibr.gov.il
Yfat Yahalom-Ronen	Israel Institution of Biological Research		Ness-Ziona, Israel	yfatyr@iibr.gov.il
Adam Smalley	UCB		216 Bath Road, Slough, SL1 3WE, United Kingdom	adam.smalley@ucb.com
Vladas Oleinikovas	UCB		216 Bath Road, Slough, SL1 3WE, United Kingdom	vladas.oleinikovas@ucb.com	0000-0001-6279-7340
John Spencer	University of Sussex	Department of Chemistry, School of Life Sciences,	University of Sussex Falmer, Brighton, East Sussex, BN1 9QJ, UK.	J.Spencer@sussex.ac.uk	http://orcid.org/0000-0001-5231-8836
Peter W. Kenny			Berwick-on-Sea, North Coast Road, Blanchisseuse, Saint George, Trinidad and Tobago	pwk.pub.2008@gmail.com	0000-0002-3105-2909
Benjamin Perry	DNDi	Discovery	15 Chemin Louis-Dunant, 1202 Geneva, Switzerland	bperry@dndi.org
Walter Ward	Walter Ward Consultancy & Training	Enzymology		wal.ward@hotmail.co.uk
Emma Cattermole	University of Oxford	Department of Biochemistry	South Parks Road, Oxford OX1 3QU	emma.cattermole@bioch.ox.ac.uk
Lori Ferrins	Northeastern University	Department of Chemistry and Chemical Biology		l.ferrins@northeastern.edu
Charles J. Eyermann	Northeastern University	Department of Chemistry and Chemical Biology		c.eyermann@northeastern.edu
