# Supplementary material for: Discovery of SARS-CoV-2 main protease inhibitors using a synthesis-directed de novo design model
Source: Chem Commun (Camb). 2021 May 6;57(48):5909–12. doi: 10.1039/d1cc00050k (PMC8204246; doi:10.1039/d1cc00050k)
Supplement: CC-057-D1CC00050K-s081 [file CC-057-D1CC00050K-s081.xlsx]

## Sheet: noncovalent_better_than_all_bes
Candidate_SMILES	Top Known Actives				Min_Probability
	COc1cc(Cl)cc(OC(=O)Nc2cccnc2)c1	COc1ccccc1OCCNC(=O)c1cc(=O)[nH]c2ccccc12	Cc1ccncc1NC(=O)Cc1cc(Cl)cc(OC2CC(=O)N2)c1	O=C(Nc1cccnc1)N(CCC1CCCCC1)c1cccc(Cl)c1		Synthetic accessibility score (lower = more accessible, score range from 0-1)
Cc1ccncc1NC(=O)N(C(=O)c1cc(=O)[nH]c2ccccc12)c1cccc(Cl)c1	0.74079	0.821417	0.882048	0.988178	0.74079	0.083521
Cc1ccncc1NC(=O)N(C(=O)c1cc(=O)[nH]c2ccccc12)c1cccc(F)c1	0.74079	0.821417	0.882048	0.988178	0.74079	0.0856673
O=C(Nc1cccnc1)N(C(=O)c1cc(=O)[nH]c2ccccc12)c1cccc(Cl)c1	0.735159	0.817105	0.878984	0.987997	0.735159	0.0860399
O=C(Nc1cccnc1)N(C(=O)c1cc(=O)[nH]c2ccccc12)c1cccc(F)c1	0.735159	0.817105	0.878984	0.987997	0.735159	0.0852169
O=C(Nc1cncnc1)N(C(=O)c1cc(=O)[nH]c2ccccc12)c1cccc(Cl)c1	0.704202	0.79303	0.861676	0.986839	0.704202	0.0901787
O=C(Nc1cncnc1)N(C(=O)c1cc(=O)[nH]c2ccccc12)c1cccc(F)c1	0.704202	0.79303	0.861676	0.986839	0.704202	0.0901577
O=C(Nc1cccc(Cl)c1)N(C(=O)c1cc(=O)[nH]c2ccccc12)c1cccnc1	0.695938	0.786496	0.856917	0.986651	0.695938	0.086419
O=C(Nc1cccc(F)c1)N(C(=O)c1cc(=O)[nH]c2ccccc12)c1cccnc1	0.695938	0.786496	0.856917	0.986651	0.695938	0.0854926
Cc1ccncc1NC(=O)N(C(=O)c1cc(=O)[nH]c2ccccc12)c1ccccc1	0.662732	0.759765	0.837178	0.985819	0.662732	0.0827358
O=C(c1cc(=O)[nH]c2ccccc12)N(Cn1nnc2ccccc21)c1cccc(Cl)c1	0.661939	0.759117	0.836694	0.985378	0.661939	0.0863906
O=C(c1cc(=O)[nH]c2ccccc12)N(Cn1nnc2ccccc21)c1cccc(F)c1	0.661939	0.759117	0.836694	0.985378	0.661939	0.162118
COc1ccc(CN(C(=O)c2cc(=O)[nH]c3ccccc23)c2cccc(F)c2)cc1	0.650629	0.74983	0.829727	0.984697	0.650629	0.0825397
Cc1ccncc1NC(=O)N(C(=O)c1cc(=O)[nH]c2ccccc12)c1cccc(C#N)c1	0.641133	0.741961	0.823781	0.984887	0.641133	0.0829573
O=C(Nc1cccc(Cl)c1)N(C(=O)c1cc(=O)[nH]c2ccccc12)c1cncnc1	0.640511	0.741443	0.823388	0.984701	0.640511	0.163247
O=C(Nc1cccc(F)c1)N(C(=O)c1cc(=O)[nH]c2ccccc12)c1cncnc1	0.640511	0.741443	0.823388	0.984701	0.640511	0.163102
O=C(c1cc(=O)[nH]c2ccccc12)N(Cc1cncnc1)c1cccc(Cl)c1	0.637887	0.739256	0.821727	0.984426	0.637887	0.0856138
O=C(c1cc(=O)[nH]c2ccccc12)N(Cc1cncnc1)c1cccc(F)c1	0.637887	0.739256	0.821727	0.984426	0.637887	0.0864257
COc1cccc(CN(C(=O)c2cc(=O)[nH]c3ccccc23)c2cccc(F)c2)c1	0.632587	0.734822	0.818351	0.984071	0.632587	0.0831255
N#Cc1cccc(N(C(=O)Nc2cccnc2)C(=O)c2cc(=O)[nH]c3ccccc23)c1	0.631562	0.733963	0.817695	0.984508	0.631562	0.0843321
Nc1cncc(N(C(=O)c2cc(=O)[nH]c3ccccc23)c2cccc(Cl)c2)c1	0.629096	0.731892	0.816113	0.984612	0.629096	0.0919918
Cn1c(C(NC(=O)c2cc(=O)[nH]c3ccccc23)c2cccc(Cl)c2)nc2ccccc21	0.62894	0.73176	0.816012	0.984425	0.62894	0.181189
Cn1c(C(NC(=O)c2cc(=O)[nH]c3ccccc23)c2cccc(F)c2)nc2ccccc21	0.62894	0.73176	0.816012	0.984425	0.62894	0.239033
O=C(c1cc(=O)[nH]c2ccccc12)N(Cc1ccccc1)c1cccc(F)c1	0.627507	0.730554	0.815089	0.984036	0.627507	0.0833379
Cc1ccncc1NC(=O)N(C(=O)c1cc(=O)[nH]c2ccccc12)c1cncc2ccccc12	0.626668	0.729847	0.814548	0.984708	0.626668	0.13377
Nc1cncc(CN(C(=O)c2cc(=O)[nH]c3ccccc23)c2cccc(Cl)c2)c1	0.625068	0.728498	0.813514	0.984314	0.625068	0.181099
Nc1cncc(CN(C(=O)c2cc(=O)[nH]c3ccccc23)c2cccc(F)c2)c1	0.625068	0.728498	0.813514	0.984314	0.625068	0.165708
O=C(c1cc(=O)[nH]c2ccccc12)N(Cc1cccc(F)c1)c1ccccc1	0.622589	0.726403	0.811905	0.983793	0.622589	0.132641
N#Cc1cccc(N(Cc2cccc(Cl)c2)C(=O)c2cc(=O)[nH]c3ccccc23)c1	0.622083	0.725975	0.811576	0.983554	0.622083	0.0866893
N#Cc1cccc(N(Cc2cccc(F)c2)C(=O)c2cc(=O)[nH]c3ccccc23)c1	0.622083	0.725975	0.811576	0.983554	0.622083	0.0841215
O=C(Nc1cncc2ccccc12)Oc1cccc(Cl)c1	0.620795	0.724885	0.810738	0.983497	0.620795	0.0912005
O=C(Nc1cncc2ccccc12)Oc1cccc(F)c1	0.620795	0.724885	0.810738	0.983497	0.620795	0.0913554
N#Cc1cccc(CN(C(=O)c2cc(=O)[nH]c3ccccc23)c2cccc(Cl)c2)c1	0.61778	0.722327	0.808768	0.983562	0.61778	0.131102
N#Cc1cccc(CN(C(=O)c2cc(=O)[nH]c3ccccc23)c2cccc(F)c2)c1	0.61778	0.722327	0.808768	0.983562	0.61778	0.130712
O=C(c1cc(=O)[nH]c2ccccc12)N(Cc1cccc(Cl)c1)c1cccnc1	0.615524	0.720409	0.807287	0.983777	0.615524	0.0834372
O=C(c1cc(=O)[nH]c2ccccc12)N(Cc1cccc(F)c1)c1cccnc1	0.615524	0.720409	0.807287	0.983777	0.615524	0.0863813
O=C(Nc1cccnc1)N(C(=O)c1cc(=O)[nH]c2ccccc12)c1ccccc1	0.61379	0.718932	0.806146	0.983872	0.61379	0.0856495
O=C(c1cc(=O)[nH]c2ccccc12)N(Cc1cccnc1)c1cccc(Cl)c1	0.611489	0.716968	0.804626	0.983471	0.611489	0.082522
O=C(c1cc(=O)[nH]c2ccccc12)N(Cc1cccnc1)c1cccc(F)c1	0.611489	0.716968	0.804626	0.983471	0.611489	0.0830437
O=C(Nc1cncnc1)N(C(=O)c1cc(=O)[nH]c2ccccc12)c1ccccc1	0.605282	0.711652	0.800498	0.983295	0.605282	0.0876951
Cc1ccncc1N(C(=O)Nc1cccc(Cl)c1)C(=O)c1cc(=O)[nH]c2ccccc12	0.601987	0.708818	0.79829	0.983067	0.601987	0.0868822
Cc1ccncc1N(C(=O)Nc1cccc(F)c1)C(=O)c1cc(=O)[nH]c2ccccc12	0.601987	0.708818	0.79829	0.983067	0.601987	0.132065
O=C(c1cc(=O)[nH]c2ccccc12)N(Cc1cccc(F)c1)c1cccc(F)c1	0.601443	0.708349	0.797924	0.982865	0.601443	0.131271
COc1ccccc1CN(C(=O)c1cc(=O)[nH]c2ccccc12)c1cccc(F)c1	0.596033	0.703676	0.794269	0.982649	0.596033	0.0824348
O=C(c1cc(=O)[nH]c2ccccc12)N(Cn1cnc2ccccc21)c1cccc(Cl)c1	0.590677	0.699026	0.790617	0.982267	0.590677	0.0877027
O=C(c1cc(=O)[nH]c2ccccc12)N(Cn1cnc2ccccc21)c1cccc(F)c1	0.590677	0.699026	0.790617	0.982267	0.590677	0.247524
O=C(Nc1cncc2ccccc12)N(C(=O)c1cc(=O)[nH]c2ccccc12)c1cccnc1	0.587164	0.695964	0.788205	0.982012	0.587164	0.0907025
O=C(c1cc(=O)[nH]c2ccccc12)N(c1cccnc1)c1cccc(Cl)c1	0.586676	0.695538	0.787869	0.981977	0.586676	0.0844698
O=C(c1cc(=O)[nH]c2ccccc12)N(c1cccnc1)c1cccc(F)c1	0.586676	0.695538	0.787869	0.981977	0.586676	0.0830206
O=C(c1cc(=O)[nH]c2ccccc12)N(Cc1cccc(Cl)c1)c1cncnc1	0.58621	0.695132	0.787548	0.981943	0.58621	0.0924624
O=C(c1cc(=O)[nH]c2ccccc12)N(Cc1cccc(F)c1)c1cncnc1	0.58621	0.695132	0.787548	0.981943	0.58621	0.136788
N#Cc1cccc(N(C(=O)c2cc(=O)[nH]c3ccccc23)c2cccc(F)c2)c1	0.585027	0.694097	0.786731	0.981856	0.585027	0.0851246
N#Cc1cccc(N(C(=O)Nc2cncnc2)C(=O)c2cc(=O)[nH]c3ccccc23)c1	0.582373	0.691773	0.784892	0.98166	0.582373	0.0880999
O=C(c1cc(=O)[nH]c2ccccc12)N(Cc1ccc(F)cc1)c1cccc(F)c1	0.581361	0.690885	0.784189	0.981585	0.581361	0.0864783
O=C(c1cc(=O)[nH]c2ccccc12)N(Cc1nnn[nH]1)c1cccc(Cl)c1	0.581325	0.690854	0.784165	0.981583	0.581325	0.139566
O=C(c1cc(=O)[nH]c2ccccc12)N(Cc1nnn[nH]1)c1cccc(F)c1	0.581325	0.690854	0.784165	0.981583	0.581325	0.133809
Cn1c(C(NC(=O)N(C(=O)c2cc(=O)[nH]c3ccccc23)c2cncnc2)c2cccc(F)c2)nc2ccccc21	0.580328	0.689978	0.78347	0.981508	0.580328	0.293507
O=C(Nc1cccnc1)N(C(=O)c1cc(=O)[nH]c2ccccc12)c1cncc2ccccc12	0.578958	0.688774	0.782515	0.981406	0.578958	0.134211
Cc1ccncc1NC(=O)N(C(=O)c1cc(=O)[nH]c2ccccc12)c1cccnc1	0.578256	0.688157	0.782025	0.981353	0.578255	0.0858783
Cn1nncc1CN(C(=O)c1cc(=O)[nH]c2ccccc12)c1cccc(Cl)c1	0.577311	0.687325	0.781364	0.981282	0.577311	0.130781
Cn1nncc1CN(C(=O)c1cc(=O)[nH]c2ccccc12)c1cccc(F)c1	0.577311	0.687325	0.781364	0.981282	0.577311	0.0835559
O=C(CC1=CC=CC(Cl)=C1)NC1=CN=C2C=CC=CC2=C1	0.575075	0.685353	0.779795	0.981114	0.575075	0.0531936
O=C(Nc1cccnc1)N(C(=O)c1cc(=O)[nH]c2ccccc12)c1cccnc1	0.574907	0.685205	0.779677	0.981101	0.574907	0.0854036
CN(C(=O)c1cc(=O)[nH]c2ccccc12)c1cccc(Cl)c1	0.570288	0.68112	0.776418	0.980748	0.570288	0.0818118
CN(C(=O)c1cc(=O)[nH]c2ccccc12)c1cccc(F)c1	0.570288	0.68112	0.776418	0.980748	0.570288	0.0531508
O=C(c1cc(=O)[nH]c2ccccc12)N(CCOc1ccccc1)c1cccc(Cl)c1	0.568639	0.679658	0.775249	0.98062	0.568639	0.0908062
Nc1cncc(N(Cc2cccc(Cl)c2)C(=O)c2cc(=O)[nH]c3ccccc23)c1	0.568423	0.679466	0.775095	0.980603	0.568423	0.0919007
Nc1cncc(N(Cc2cccc(F)c2)C(=O)c2cc(=O)[nH]c3ccccc23)c1	0.568423	0.679466	0.775095	0.980603	0.568423	0.135737
O=C(c1cc(=O)[nH]c2ccccc12)N1COc2ccc(Cl)cc21	0.563437	0.675029	0.771537	0.980214	0.563437	0.182992
O=C(c1cc(=O)[nH]c2ccccc12)N(c1cncnc1)C(c1ccccc1)c1cccc(F)c1	0.562829	0.674487	0.771101	0.980166	0.562829	0.0863939
O=C(CC1=CC=CC(Cl)=C1)NC1=CN=C2C=CC=CC2=N1	0.561848	0.673611	0.770397	0.980088	0.561848	0.0531402
COc1cccc(C(NC(=O)Cc2cccc(Cl)c2)c2nc3ccccc3n2C)c1	0.561456	0.673262	0.770115	0.980057	0.561456	0.256707
COc1cccc(C(NC(=O)Cc2cccc(F)c2)c2nc3ccccc3n2C)c1	0.561456	0.673262	0.770115	0.980057	0.561456	0.256627
O=C(c1cc(=O)[nH]c2ccccc12)N(Cc1ccc(F)cc1)c1ccccc1	0.557886	0.670066	0.76754	0.979772	0.557886	0.0915605
N#Cc1cccc(N(Cc2ccc(F)cc2)C(=O)c2cc(=O)[nH]c3ccccc23)c1	0.556325	0.668667	0.76641	0.979646	0.556325	0.0855774
COc1ccc(Cl)cc1C(NC(=O)c1cc(=O)[nH]c2ccccc12)c1nc2ccccc2n1C	0.556022	0.668394	0.76619	0.979622	0.556022	0.257629
O=C(c1cc(=O)[nH]c2ccccc12)N(c1cncnc1)c1cccc(Cl)c1	0.555977	0.668354	0.766157	0.979618	0.555977	0.0906845
O=C(c1cc(=O)[nH]c2ccccc12)N(c1cncnc1)c1cccc(F)c1	0.555977	0.668354	0.766157	0.979618	0.555977	0.0888427
O=C(c1cc(=O)[nH]c2ccccc12)N(Cc1ccc(F)cc1)c1cccnc1	0.555822	0.668215	0.766045	0.979605	0.555822	0.0841549
N#Cc1cccc(N(C(=O)c2cc(=O)[nH]c3ccccc23)C(c2ccccc2)c2cncc(N)c2)c1	0.552809	0.665505	0.763852	0.97936	0.552809	0.24761
O=C(CC1=CC=CC(Cl)=C1)NC1=CN=CC=C1OC1=CC=CC=C1	0.55255	0.665272	0.763663	0.979339	0.55255	0.0536849
Nc1cncc(NC(=O)Oc2cccc(Cl)c2)c1	0.551624	0.664437	0.762986	0.979263	0.551624	0.161917
Nc1cncc(NC(=O)Oc2cccc(F)c2)c1	0.551624	0.664437	0.762986	0.979263	0.551624	0.16458
Nc1cncc(NC(=O)N(C(=O)c2cc(=O)[nH]c3ccccc23)c2cccnc2)c1	0.547899	0.661074	0.760254	0.978955	0.547899	0.096551
N#Cc1cccc(NC(=O)N(C(=O)c2cc(=O)[nH]c3ccccc23)c2cccnc2)c1	0.547293	0.660526	0.759808	0.978905	0.547293	0.0841643
Cc1ccncc1NC(=O)N(C(=O)c1cc(=O)[nH]c2ccccc12)c1cnccc1C	0.546606	0.659904	0.759301	0.978848	0.546606	0.0858929
O=C(NC(c1ccccc1)c1ccccc1F)N(C(=O)c1cc(=O)[nH]c2ccccc12)c1cncnc1	0.545852	0.659221	0.758745	0.978784	0.545852	0.164007
O=C(CC1=CC=CC(Cl)=C1)NC1=CN=CC=C1C1=CC=CC=C1	0.544902	0.658359	0.758043	0.978705	0.544902	0
COc1ccccc1OCCN(C(=O)c1cc(=O)[nH]c2ccccc12)c1cccc(Cl)c1	0.543586	0.657165	0.757068	0.978594	0.543586	0.0900715
Cn1c(C(NC(=O)Cc2cccc(Cl)c2)c2cccc(F)c2)nc2ccccc21	0.543389	0.656986	0.756922	0.978577	0.543389	0.237136
Cn1c(C(NC(=O)Cc2cccc(F)c2)c2cccc(Cl)c2)nc2ccccc21	0.543389	0.656986	0.756922	0.978577	0.543389	0.181272
Cn1c(C(NC(=O)Cc2cccc(F)c2)c2cccc(F)c2)nc2ccccc21	0.543389	0.656986	0.756922	0.978577	0.543389	0.236932
O=C(Nc1cncnc1)N(C(=O)c1cc(=O)[nH]c2ccccc12)c1cncc2ccccc12	0.541421	0.655197	0.755461	0.978411	0.541421	0.138271
Cc1ccncc1NC(=O)N(C(=O)c1cc(=O)[nH]c2ccccc12)c1cncnc1	0.540872	0.654698	0.755052	0.978364	0.540872	0.161622
Cn1nncc1N(Cc1cccc(Cl)c1)C(=O)c1cc(=O)[nH]c2ccccc12	0.540548	0.654403	0.754811	0.978336	0.540548	0.132447
Cn1nncc1N(Cc1cccc(F)c1)C(=O)c1cc(=O)[nH]c2ccccc12	0.540548	0.654403	0.754811	0.978336	0.540548	0.132598
O=C(Nc1ccccc1)N(C(=O)c1cc(=O)[nH]c2ccccc12)c1cccnc1	0.538232	0.652291	0.753081	0.978138	0.538232	0.0854269
Cc1ccncc1NC(=O)N(C(=O)c1cc(=O)[nH]c2ccccc12)c1cnccc1Cl	0.536906	0.65108	0.752088	0.978023	0.536906	0.161535
COc1cc(Cl)cc(OC(=O)Nc2cncc3ccccc23)c1	0.536624	0.650822	0.751876	0.977999	0.536624	0.0918084
Cc1ccncc1NC(=O)N(C(=O)c1cc(=O)[nH]c2ccccc12)c1cncc(N)c1	0.535752	0.650026	0.751222	0.977923	0.535752	0.161648
Cn1c(C(NC(=O)c2cc(=O)[nH]c3ccc(F)cc23)c2cccc(Cl)c2)nc2ccccc21	0.535749	0.650023	0.75122	0.977923	0.535749	0.184105
Cn1c(C(NC(=O)c2cc(=O)[nH]c3ccc(F)cc23)c2cccc(F)c2)nc2ccccc21	0.535749	0.650023	0.75122	0.977923	0.535749	0.252647
COc1cccc(CN(C(=O)c2cc(=O)[nH]c3ccccc23)c2cccc(C#N)c2)c1	0.535106	0.649435	0.750737	0.977867	0.535106	0.0828787
O=C(NC(c1ccccc1)c1cccnc1)N(C(=O)c1cc(=O)[nH]c2ccccc12)c1cccnc1	0.534913	0.649258	0.750591	0.97785	0.534913	0.0915704
Cc1ccncc1NC(=O)N(C(=O)c1cc(=O)[nH]c2ccc(F)cc12)c1cccc(Cl)c1	0.534837	0.649189	0.750534	0.977844	0.534837	0.132641
Cc1ccncc1NC(=O)N(C(=O)c1cc(=O)[nH]c2ccc(F)cc12)c1cccc(F)c1	0.534837	0.649189	0.750534	0.977844	0.534837	0.133706
O=C(c1cc(=O)[nH]c2ccccc12)N(Cc1ccccc1F)c1cccc(F)c1	0.532378	0.646935	0.748679	0.977629	0.532378	0.0861674
O=C(NC(c1ccccc1)c1cccc(F)c1)N(C(=O)c1cc(=O)[nH]c2ccccc12)c1cncnc1	0.532204	0.646775	0.748548	0.977613	0.532204	0.164332
Cc1ccncc1CN(C(=O)c1cc(=O)[nH]c2ccccc12)c1cccc(Cl)c1	0.531008	0.645677	0.747643	0.977508	0.531008	0.129679
Cc1ccncc1CN(C(=O)c1cc(=O)[nH]c2ccccc12)c1cccc(F)c1	0.531008	0.645677	0.747643	0.977508	0.531008	0.129602
CC1=C(NC(=O)CC2=CC=CC(Cl)=C2)C=NC2=CC=CC=C12	0.530389	0.645108	0.747173	0.977453	0.530389	0.0536268
N#Cc1cccc(N(Cn2nnc3ccccc32)C(=O)c2cc(=O)[nH]c3ccccc23)c1	0.530058	0.644805	0.746923	0.977424	0.530059	0.162617
COc1cccc(CN(C(=O)c2cc(=O)[nH]c3ccccc23)c2ccccc2)c1	0.529683	0.644459	0.746638	0.977391	0.529683	0.0836395
O=C(Nc1cncc2ccccc12)N(C(=O)c1cc(=O)[nH]c2ccccc12)c1cncnc1	0.52823	0.643121	0.745533	0.977261	0.52823	0.166131
O=C(c1cc(=O)[nH]c2ccccc12)N(CCOc1cccnc1)c1cccc(Cl)c1	0.52761	0.64255	0.74506	0.977206	0.52761	0.135751
O=C(Nc1cncnc1)N(C(=O)Oc1ccccc1)c1cccc(Cl)c1	0.52695	0.641942	0.744558	0.977147	0.52695	0.089906
O=C(Nc1cncnc1)N(C(=O)Oc1ccccc1)c1cccc(F)c1	0.52695	0.641942	0.744558	0.977147	0.52695	0.165274
O=C(NC(c1ccccc1)c1cccc(Cl)c1)c1cc(=O)[nH]c2ccccc12	0.525819	0.640899	0.743694	0.977046	0.525819	0.0541867
O=C(NC(c1ccccc1)c1cccc(F)c1)c1cc(=O)[nH]c2ccccc12	0.525819	0.640899	0.743694	0.977046	0.525819	0
O=C(c1cc(=O)[nH]c2ccccc12)N(Cc1ccsc1)c1cccc(F)c1	0.524798	0.639956	0.742912	0.976954	0.524798	0.0846188
Nc1cncc(CN(C(=O)c2cc(=O)[nH]c3ccccc23)c2ccccc2)c1	0.522613	0.637935	0.741236	0.976756	0.522613	0.182734
COc1ccc(CN(C(=O)c2cc(=O)[nH]c3ccccc23)c2ccccc2)cc1	0.522054	0.637417	0.740806	0.976705	0.522054	0.0822157
O=C(Nc1cnccc1Cl)N(C(=O)c1cc(=O)[nH]c2ccccc12)c1cccnc1	0.520563	0.636036	0.739657	0.976568	0.520563	0.0896185
Cc1ccncc1NC(=O)N(C(=O)c1cc(=O)[nH]c2ccc(F)cc12)c1ccccc1	0.520123	0.635627	0.739317	0.976528	0.520123	0.131343
O=C(c1cc(=O)[nH]c2ccccc12)N(Cc1ccc(F)cc1)c1cncnc1	0.519805	0.635332	0.739072	0.976499	0.519805	0.0892236
O=C(NC(c1ccccc1)c1ccccc1)N(C(=O)c1cc(=O)[nH]c2ccccc12)c1cncnc1	0.51948	0.63503	0.73882	0.976469	0.51948	0.163564
Nc1cncc(C(c2ccccc2)N(C(=O)c2cc(=O)[nH]c3ccccc23)c2cccnc2)c1	0.519318	0.634879	0.738695	0.976454	0.519318	0.26348
Cc1ccncc1NC(=O)NC(c1cccc(Cl)c1)c1nc2ccccc2n1C	0.516636	0.632386	0.736616	0.976206	0.516636	0.182892
Cc1ccncc1NC(=O)NC(c1cccc(F)c1)c1nc2ccccc2n1C	0.516636	0.632386	0.736616	0.976206	0.516636	0.236951
O=C(CC1=CC=CC(Cl)=C1)NC1=CN=CC(=N1)C1=CC=NC=C1	0.516219	0.631998	0.736292	0.976167	0.516219	0.0540413
Cn1c(C(c2nnn[nH]2)N(C(=O)c2cc(=O)[nH]c3ccccc23)c2cccc(Cl)c2)nc2ccccc21	0.515607	0.631428	0.735816	0.97611	0.515607	0.341899
COc1cccc(CN(C(=O)c2cc(=O)[nH]c3ccccc23)c2cccnc2)c1	0.515051	0.63091	0.735383	0.976058	0.515051	0.0835851
Cc1ccncc1N(C(=O)Nc1ccccc1)C(=O)c1cc(=O)[nH]c2ccccc12	0.514779	0.630656	0.735172	0.976032	0.514779	0.0850568
COc1ccc(CN(C(=O)c2cc(=O)[nH]c3ccccc23)c2cccc(C#N)c2)cc1	0.513687	0.629637	0.73432	0.97593	0.513687	0.086183
O=C(CC1=CC=CC(Cl)=C1)NC1=CC2=CC=CC=C2N=N1	0.513462	0.629427	0.734143	0.975909	0.513461	0.0533637
O=C(c1cc(=O)[nH]c2ccccc12)N(Cn1nnc2ccccc21)c1ccccc1	0.512968	0.628966	0.733758	0.975862	0.512968	0.0857834
Nc1cncc(N(Cc2ccc(F)cc2)C(=O)c2cc(=O)[nH]c3ccccc23)c1	0.509369	0.625598	0.730934	0.975521	0.509369	0.0891801
N#Cc1cccc(N(C(=O)c2cc(=O)[nH]c3ccccc23)c2cccnc2)c1	0.50896	0.625215	0.730612	0.975481	0.50896	0.0856848
Cc1ccncc1N(C(=O)Nc1cncc2ccccc12)C(=O)c1cc(=O)[nH]c2ccccc12	0.508848	0.62511	0.730524	0.975471	0.508848	0.134348
O=C(Nc1cncnc1)N(C(=O)c1cc(=O)[nH]c2ccccc12)c1cccnc1	0.508128	0.624435	0.729957	0.975402	0.508128	0.0909777
O=C(Nc1cccnc1)N(C(=O)Oc1ccccc1)c1cccc(Cl)c1	0.507584	0.623924	0.729527	0.975349	0.507584	0.0858362
O=C(Nc1cccnc1)N(C(=O)Oc1ccccc1)c1cccc(F)c1	0.507584	0.623924	0.729527	0.975349	0.507584	0.0958458
COc1cccc(C(NC(=O)c2cc(=O)[nH]c3ccccc23)c2nc3ccccc3n2C)c1	0.507421	0.623771	0.729399	0.975334	0.507421	0.257015
NC(N)Oc1cc(F)cc(N(C(=O)Nc2cccnc2)C(=O)c2cc(=O)[nH]c3ccccc23)c1	0.506034	0.622468	0.728302	0.9752	0.506034	0.55982
O=C(Nc1ccccc1)N(C(=O)c1cc(=O)[nH]c2ccccc12)c1cncnc1	0.505985	0.622422	0.728263	0.975195	0.505985	0.0904021
N#Cc1cccc(N(Cc2ccccc2)C(=O)c2cc(=O)[nH]c3ccccc23)c1	0.505837	0.622283	0.728146	0.975181	0.505837	0.0822762
Cc1ccncc1NC(=O)N(C(=O)c1cc(=O)[nH]c2ccccc12)c1cc(F)cc(OC(N)N)c1	0.505461	0.621929	0.727848	0.975144	0.505461	0.560108
O=C(Nc1cccc(Cl)c1)Oc1cncc2ccccc12	0.50531	0.621787	0.727728	0.97513	0.50531	0.0900613
O=C(Nc1cccc(F)c1)Oc1cncc2ccccc12	0.50531	0.621787	0.727728	0.97513	0.50531	0.0868146
Cc1ccncc1NC(=O)N(C(=O)Oc1ccccc1)c1cccc(F)c1	0.505114	0.621603	0.727573	0.975111	0.505114	0.16158
O=C(c1cc(=O)[nH]c2ccccc12)N(Cc1cnccc1Cl)c1cccc(F)c1	0.50432	0.620856	0.726943	0.975033	0.50432	0.136423
O=C(c1cc(=O)[nH]c2ccccc12)N(c1ccccc1)c1cccnc1	0.503968	0.620523	0.726663	0.974999	0.503968	0.0815383
O=C(c1cc(=O)[nH]c2ccccc12)N(c1cccc(Cl)c1)c1nnn[nH]1	0.503504	0.620087	0.726295	0.974954	0.503504	0.0857988
O=C(c1cc(=O)[nH]c2ccccc12)N(c1cncnc1)C(c1ccccc1)c1ccc(F)cc1	0.503229	0.619828	0.726076	0.974927	0.503229	0.13362
Cc1nnn(CN(C(=O)c2cc(=O)[nH]c3ccccc23)c2cccc(Cl)c2)c1C	0.50275	0.619376	0.725695	0.97488	0.50275	0.285187
Cc1nnn(CN(C(=O)c2cc(=O)[nH]c3ccccc23)c2cccc(F)c2)c1C	0.50275	0.619376	0.725695	0.97488	0.50275	0.286504
N#Cc1cccc(N(C(=O)c2cc(=O)[nH]c3ccccc23)c2cncc(N)c2)c1	0.500106	0.616879	0.723584	0.97462	0.500106	0.0945601
