# Supplementary material for: Discovery of SARS-CoV-2 main protease inhibitors using a synthesis-directed de novo design model
Source: Royal Society of Chemistry journal article supplement (doi:10.1039/d1cc00050k), 2021-01-01
Supplement: d1cc00050k1.zip [file ALP-POS-ddb41b15-1_intermediate7.pdf › new_ESI/spectroscopic_data/compound2/ALP-POS-ddb41b15-1_intermediate7.pdf]

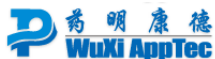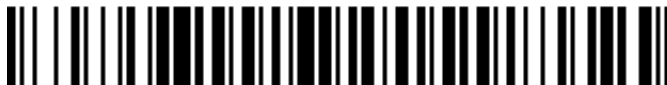

|                     |                                       |
|---------------------|---------------------------------------|
| Document Number:    | EB2224-108C                           |
| Title:              | EB2224-108-P1A.pdf                    |
| Chemist:            | ZHOU,PENG                             |
| Created Date:       | Aug.28.2020                           |
| Last Modified Date: | Aug.31.2020                           |
| Witness:            | Witnessed by CHEN, HUI on Aug.31.2020 |
| Print Date:         | Nov.09.2020                           |
| Copyright:          | WuXi AppTec                           |
| Classifications:    | Confidential, Vital Integrity         |

[EB2224-108C] EB2224-108-P1A.pdf

3

Compound ID: 00000000

EB2224-108-P1A CDCl3 Bruker\_NT-C\_400MHz

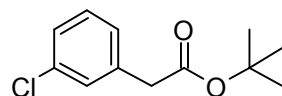

7.199  
7.189  
7.178  
7.173  
7.166  
7.162  
7.093  
7.086

3.452  
3.428

1.370

Supervisor: Jane Wang

|                        |                                                           |
|------------------------|-----------------------------------------------------------|
| Acquisition Time (sec) | 1.9999                                                    |
| Comment                | EB2224-1<br>08-P1A<br>CDCl3<br>Bruker_N<br>T-C_400M<br>Hz |
| Date                   | 28 Aug<br>2020<br>08:33:59                                |
| Frequency (MHz)        | 400.1400                                                  |
| Nucleus                | <sup>1</sup> H                                            |
| Number of Transients   | 8                                                         |
| Origin                 | Avance                                                    |
| Original Points Count  | 16393                                                     |
| Owner                  | nmrsu                                                     |
| Points Count           | 65536                                                     |
| Pulse Sequence         | zg30                                                      |
| Receiver Gain          | 101.00                                                    |
| SW(cyclical) (Hz)      | 8196.72                                                   |
| Solvent                | CHLORO<br>FORM-d                                          |
| Spectrum Offset (Hz)   | 2362.7681                                                 |
| Spectrum Type          | standard                                                  |
| Sweep Width (Hz)       | 8196.60                                                   |
| Temperature (degree C) | 22.421                                                    |

<sup>1</sup>H NMR (400MHz,  
CHLOROFORM-d) δ = 7.22 - 7.16  
(m, 3H), 7.10 - 7.06 (m, 1H), 3.45 -  
3.41 (m, 2H), 1.37 (s, 9H)

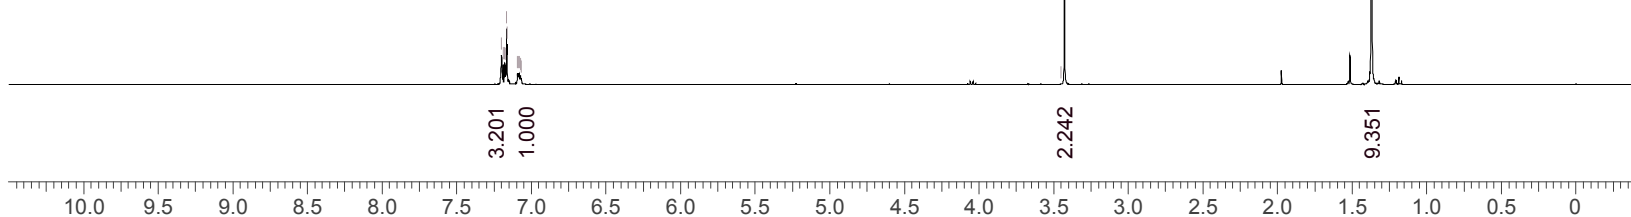

Confidential. For research only Not for regulatory filing

Operator:

Date:
