# Supplementary material for: Discovery of SARS-CoV-2 main protease inhibitors using a synthesis-directed de novo design model
Source: Royal Society of Chemistry journal article supplement (doi:10.1039/d1cc00050k), 2021-01-01
Supplement: d1cc00050k1.zip [file ALP-POS-ddb41b15-1_intermediate8.pdf › new_ESI/spectroscopic_data/compound2/ALP-POS-ddb41b15-1_intermediate8.pdf]

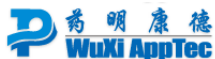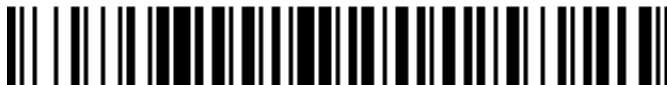

|                     |                                       |
|---------------------|---------------------------------------|
| Document Number:    | EB2224-114C                           |
| Title:              | EB2224-114-P1A.pdf                    |
| Chemist:            | ZHOU,PENG                             |
| Created Date:       | Sep.01.2020                           |
| Last Modified Date: | Sep.03.2020                           |
| Witness:            | Witnessed by CHEN, HUI on Sep.03.2020 |
| Print Date:         | Nov.10.2020                           |
| Copyright:          | WuXi AppTec                           |
| Classifications:    | Confidential, Vital Integrity         |

[EB2224-114C] EB2224-114-P1A.pdf

3

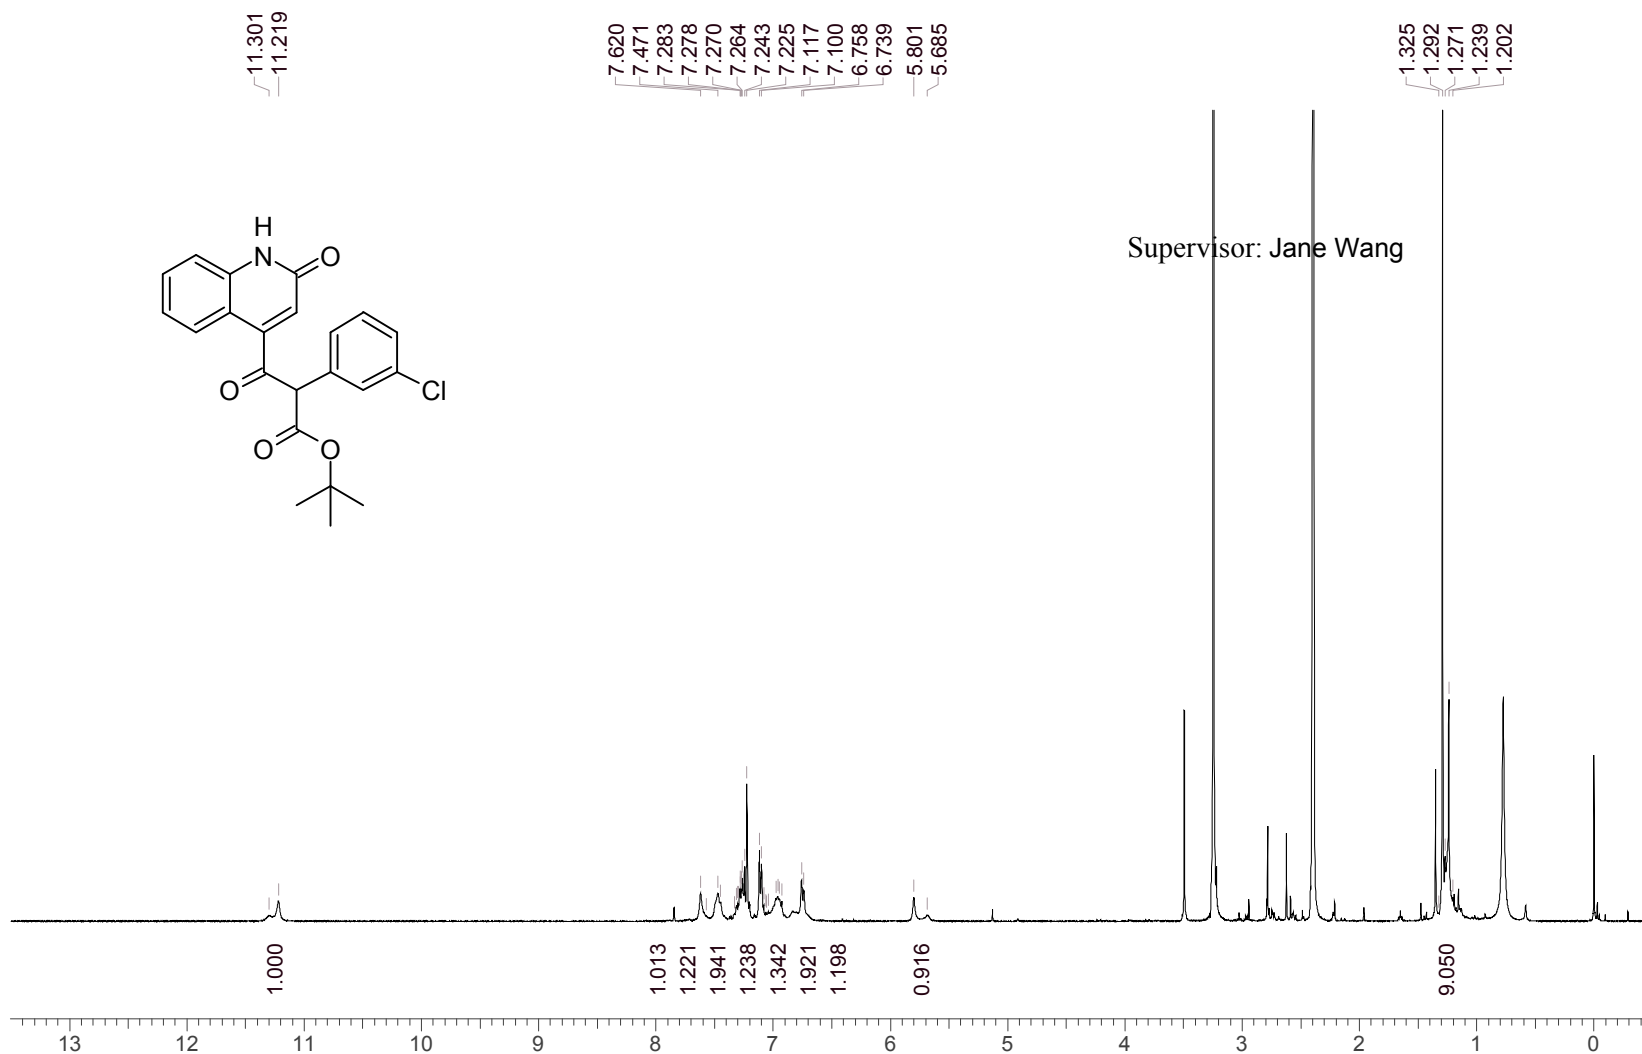

Acquisition Time (sec) 1.9999  
Comment EB2224-1  
14-P1A  
DMSO  
Bruker\_N  
T-C\_400M  
Hz  
Date 01 Sep  
2020  
05:11:34  
Frequency (MHz) 400.1400  
Nucleus 1H  
Number of Transients 8  
Origin Avance  
Original Points Count 16393  
Owner nmrsu  
Points Count 65536  
Pulse Sequence zg30  
Receiver Gain 101.00  
SW(cyclical) (Hz) 8196.72  
Solvent DMSO-d<sub>6</sub>  
Spectrum Offset (Hz) 2355.9458  
Spectrum Type standard  
Sweep Width (Hz) 8196.60  
Temperature (degree C) 21.672
