# Supplementary material for: Discovery of SARS-CoV-2 main protease inhibitors using a synthesis-directed de novo design model
Source: Royal Society of Chemistry journal article supplement (doi:10.1039/d1cc00050k), 2021-01-01
Supplement: d1cc00050k1.zip [file ALP-POS-ddb41b15-3_intermediate2.pdf › new_ESI/spectroscopic_data/compound3/ALP-POS-ddb41b15-3_intermediate2.pdf]

Compound ID: 00000000

EB2224-140-P1A CDCl3 Bruker\_NT-C\_400MHz

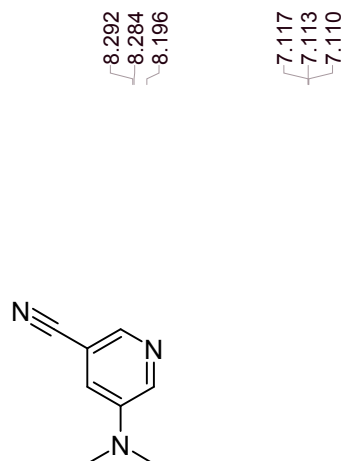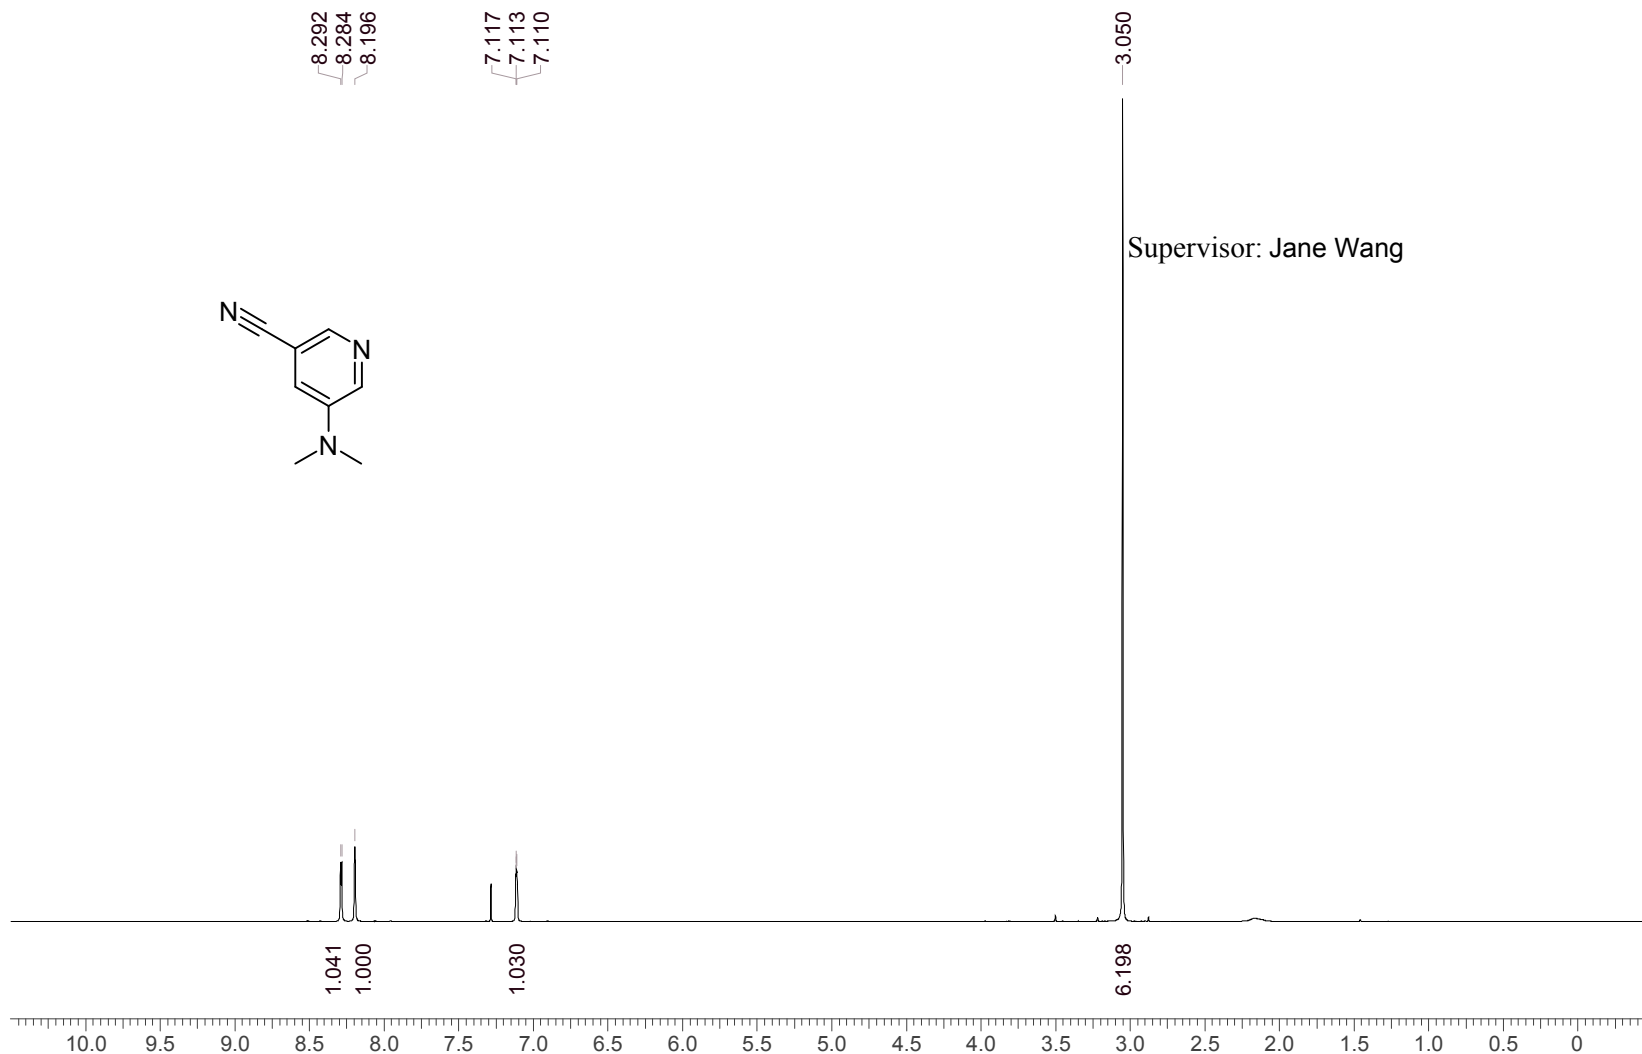

Supervisor: Jane Wang

|                        |                                                                       |
|------------------------|-----------------------------------------------------------------------|
| Acquisition Time (sec) | 1.9999                                                                |
| Comment                | EB2224-1<br>40-P1A<br>CDCl <sub>3</sub><br>Bruker_N<br>T-C_400M<br>Hz |
| Date                   | 23 Sep<br>2020<br>12:06:33                                            |
| Frequency (MHz)        | 400.1400                                                              |
| Nucleus                | <sup>1</sup> H                                                        |
| Number of Transients   | 8                                                                     |
| Origin                 | Avance                                                                |
| Original Points Count  | 16393                                                                 |
| Owner                  | nmrsu                                                                 |
| Points Count           | 65536                                                                 |
| Pulse Sequence         | zg30                                                                  |
| Receiver Gain          | 101.00                                                                |
| SW(cyclical) (Hz)      | 8196.72                                                               |
| Solvent                | CHLORO<br>FORM-d                                                      |
| Spectrum Offset (Hz)   | 2400.8411                                                             |
| Spectrum Type          | standard                                                              |
| Sweep Width (Hz)       | 8196.60                                                               |
| Temperature (degree C) | 23.386                                                                |

<sup>1</sup>H NMR (400MHz,  
CHLOROFORM-d) δ = 8.29 (d,  
J=3.0 Hz, 1H), 8.20 (s, 1H), 7.11  
(dd, J=1.6, 2.8 Hz, 1H), 3.05 (s, 6H)
