# Supplementary material for: Discovery of SARS-CoV-2 main protease inhibitors using a synthesis-directed de novo design model
Source: Royal Society of Chemistry journal article supplement (doi:10.1039/d1cc00050k), 2021-01-01
Supplement: d1cc00050k1.zip [file ALP-POS-ddb41b15-3_intermediate4.pdf › new_ESI/spectroscopic_data/compound3/ALP-POS-ddb41b15-3_intermediate4.pdf]

Compound ID: 00000000

EB2224-152-P1A DMSO Bruker\_NT-C\_400MHz

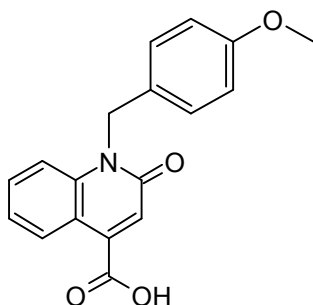

Supervisor: Jane Wang

|                        |                                                          |
|------------------------|----------------------------------------------------------|
| Acquisition Time (sec) | 1.9999                                                   |
| Comment                | EB2224-1<br>52-P1A<br>DMSO<br>Bruker_N<br>T-C_400M<br>Hz |
| Date                   | 27 Sep<br>2020<br>12:10:55                               |
| Frequency (MHz)        | 400.1400                                                 |
| Nucleus                | <sup>1</sup> H                                           |
| Number of Transients   | 8                                                        |
| Origin                 | Avance                                                   |
| Original Points Count  | 16393                                                    |
| Owner                  | nmrsu                                                    |
| Points Count           | 65536                                                    |
| Pulse Sequence         | zg30                                                     |
| Receiver Gain          | 101.00                                                   |
| SW(cyclical) (Hz)      | 8196.72                                                  |
| Solvent                | DMSO-d <sub>6</sub>                                      |
| Spectrum Offset (Hz)   | 2421.3479                                                |
| Spectrum Type          | standard                                                 |
| Sweep Width (Hz)       | 8196.60                                                  |
| Temperature (degree C) | 23.334                                                   |

<sup>1</sup>H NMR (400MHz, DMSO-d<sub>6</sub>) δ =  
8.27 - 8.19 (m, 1H), 7.67 - 7.52 (m,  
2H), 7.38 - 7.31 (m, 1H), 7.23 (d,  
J=8.6 Hz, 2H), 7.11 (s, 1H), 6.95 -  
6.90 (m, 2H), 5.54 (br s, 2H), 3.75  
(s, 3H)

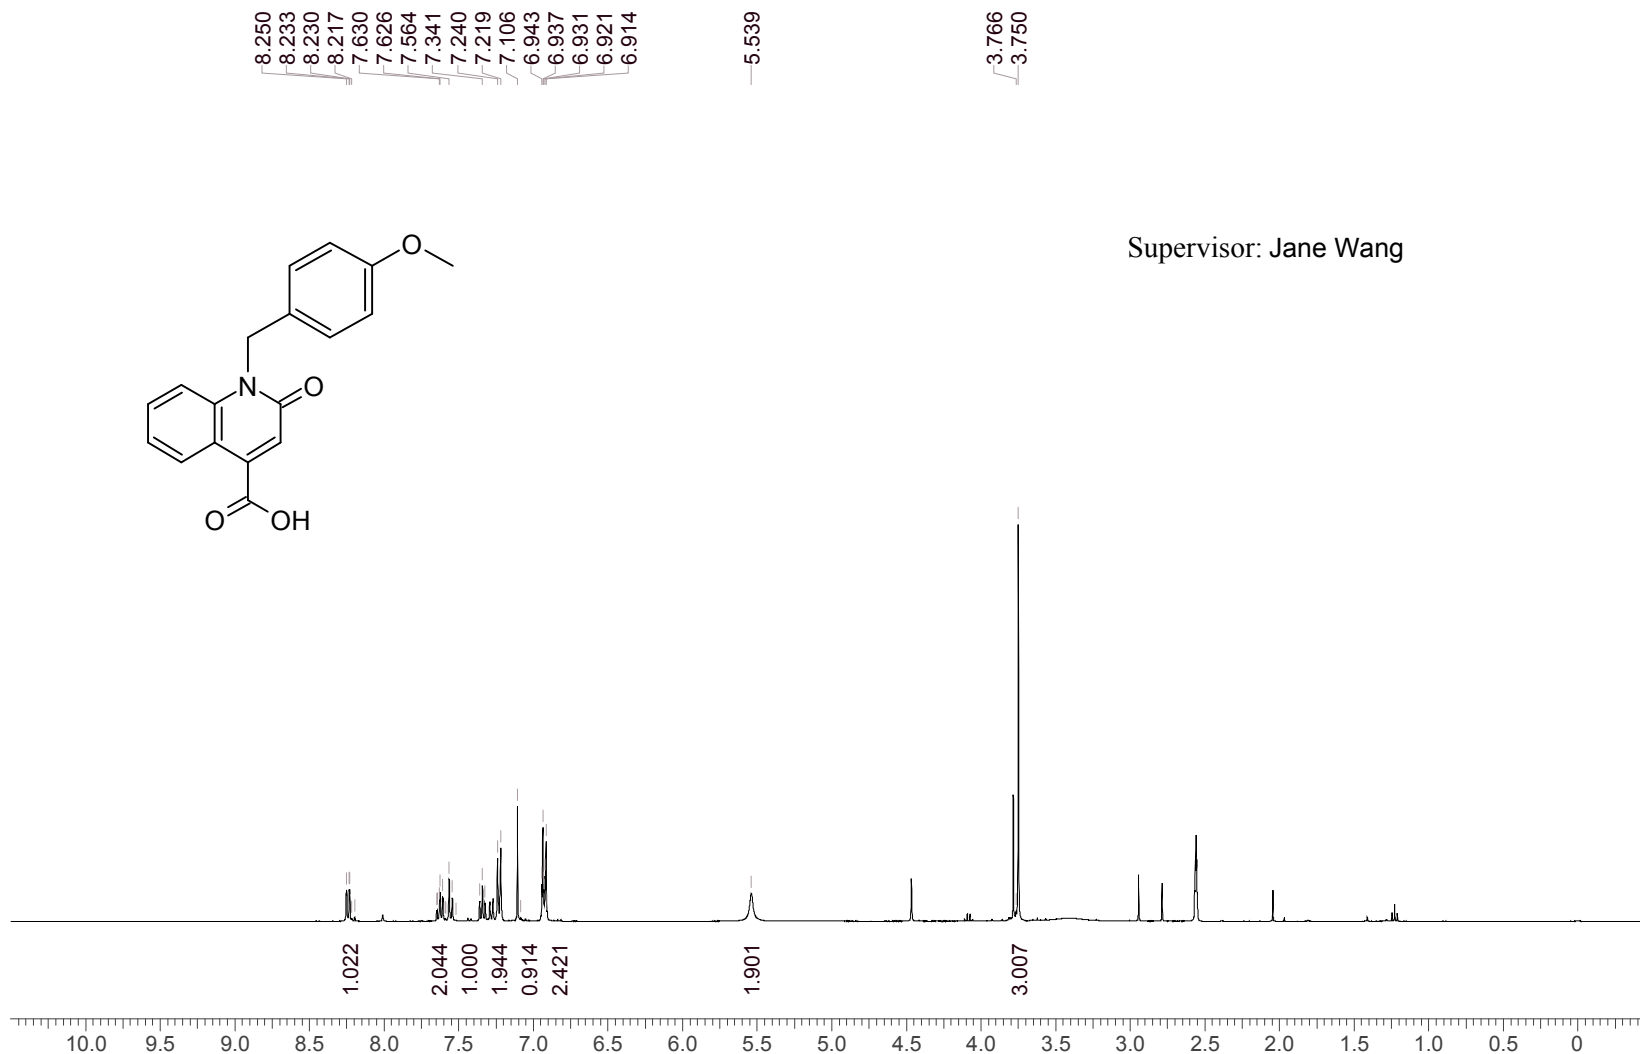

Confidential. For research only Not for regulatory filing

Operator:

Date:
