# Supplementary material for: Discovery of SARS-CoV-2 main protease inhibitors using a synthesis-directed de novo design model
Source: Royal Society of Chemistry journal article supplement (doi:10.1039/d1cc00050k), 2021-01-01
Supplement: d1cc00050k1.zip [file ALP-POS-ddb41b15-3_intermediate5.pdf › new_ESI/spectroscopic_data/compound3/ALP-POS-ddb41b15-3_intermediate5.pdf]

Compound ID: 00000000

EB2224-187-P1A DMSO Bruker\_NT-C\_400MHz

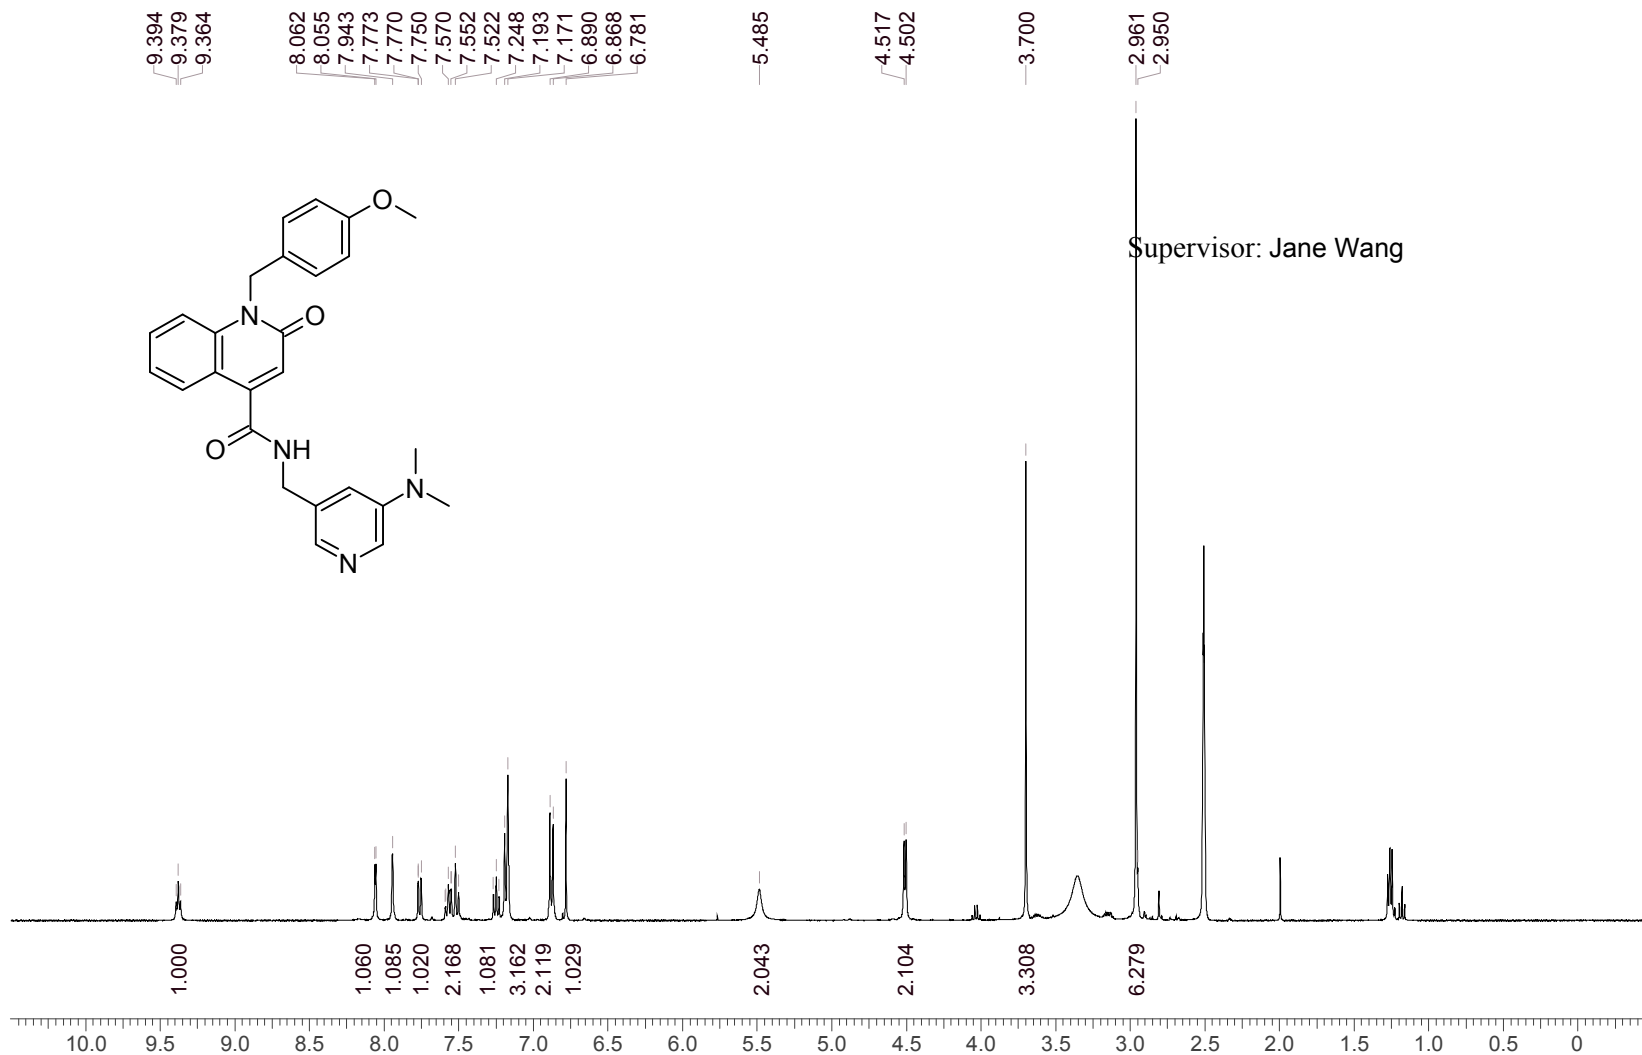

Supervisor: Jane Wang

|                                                                                                                                                                                                                                                                         |                                                          |
|-------------------------------------------------------------------------------------------------------------------------------------------------------------------------------------------------------------------------------------------------------------------------|----------------------------------------------------------|
| Acquisition Time (sec)                                                                                                                                                                                                                                                  | 1.9999                                                   |
| Comment                                                                                                                                                                                                                                                                 | EB2224-1<br>87-P1A<br>DMSO<br>Bruker_N<br>T-C_400M<br>Hz |
| Date                                                                                                                                                                                                                                                                    | 23 Oct<br>2020<br>09:22:09                               |
| Frequency (MHz)                                                                                                                                                                                                                                                         | 400.1400                                                 |
| Nucleus                                                                                                                                                                                                                                                                 | 1H                                                       |
| Number of Transients                                                                                                                                                                                                                                                    | 8                                                        |
| Origin                                                                                                                                                                                                                                                                  | Avance                                                   |
| Original Points Count                                                                                                                                                                                                                                                   | 16393                                                    |
| Owner                                                                                                                                                                                                                                                                   | nmrsu                                                    |
| Points Count                                                                                                                                                                                                                                                            | 65536                                                    |
| Pulse Sequence                                                                                                                                                                                                                                                          | zg30                                                     |
| Receiver Gain                                                                                                                                                                                                                                                           | 101.00                                                   |
| SW(cyclical) (Hz)                                                                                                                                                                                                                                                       | 8196.72                                                  |
| Solvent                                                                                                                                                                                                                                                                 | DMSO-d6                                                  |
| Spectrum Offset (Hz)                                                                                                                                                                                                                                                    | 2400.8411                                                |
| Spectrum Type                                                                                                                                                                                                                                                           | standard                                                 |
| Sweep Width (Hz)                                                                                                                                                                                                                                                        | 8196.60                                                  |
| Temperature (degree C)                                                                                                                                                                                                                                                  | 21.981                                                   |
| <sup>1</sup> H NMR (400MHz, DMSO-d <sub>6</sub> ) δ =                                                                                                                                                                                                                   |                                                          |
| 9.38 (t, J=5.9 Hz, 1H), 8.06 (d, J=2.8 Hz, 1H), 7.94 (s, 1H), 7.76 (dd, J=1.1, 8.1 Hz, 1H), 7.60 - 7.49 (m, 2H), 7.25 (t, J=7.4 Hz, 1H), 7.20 - 7.15 (m, 3H), 6.88 (d, J=8.8 Hz, 2H), 6.78 (s, 1H), 5.49 (br s, 2H), 4.51 (d, J=5.9 Hz, 2H), 3.70 (s, 3H), 2.96 (s, 6H) |                                                          |

Confidential. For research only Not for regulatory filing

Operator:

Date:
