# Supplementary material for: Discovery of SARS-CoV-2 main protease inhibitors using a synthesis-directed de novo design model
Source: Royal Society of Chemistry journal article supplement (doi:10.1039/d1cc00050k), 2021-01-01
Supplement: d1cc00050k1.zip [file ALP-POS-ddb41b15-3_intermediate6.pdf › new_ESI/spectroscopic_data/compound3/ALP-POS-ddb41b15-3_intermediate6.pdf]

Compound ID: 00000000

EB2224-191-P1A DMSO Bruker\_NT-A\_400MHZ

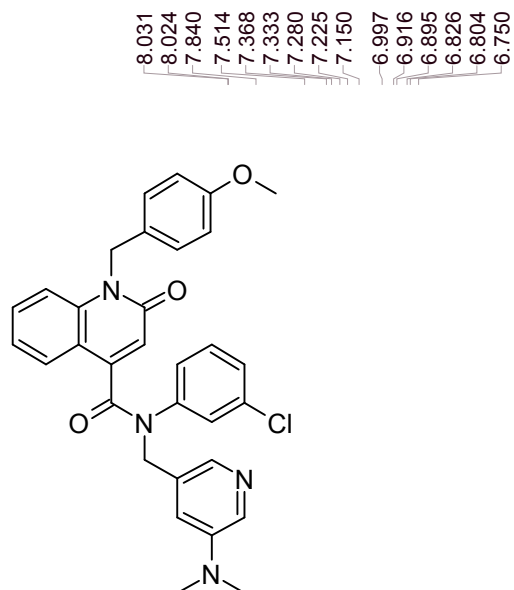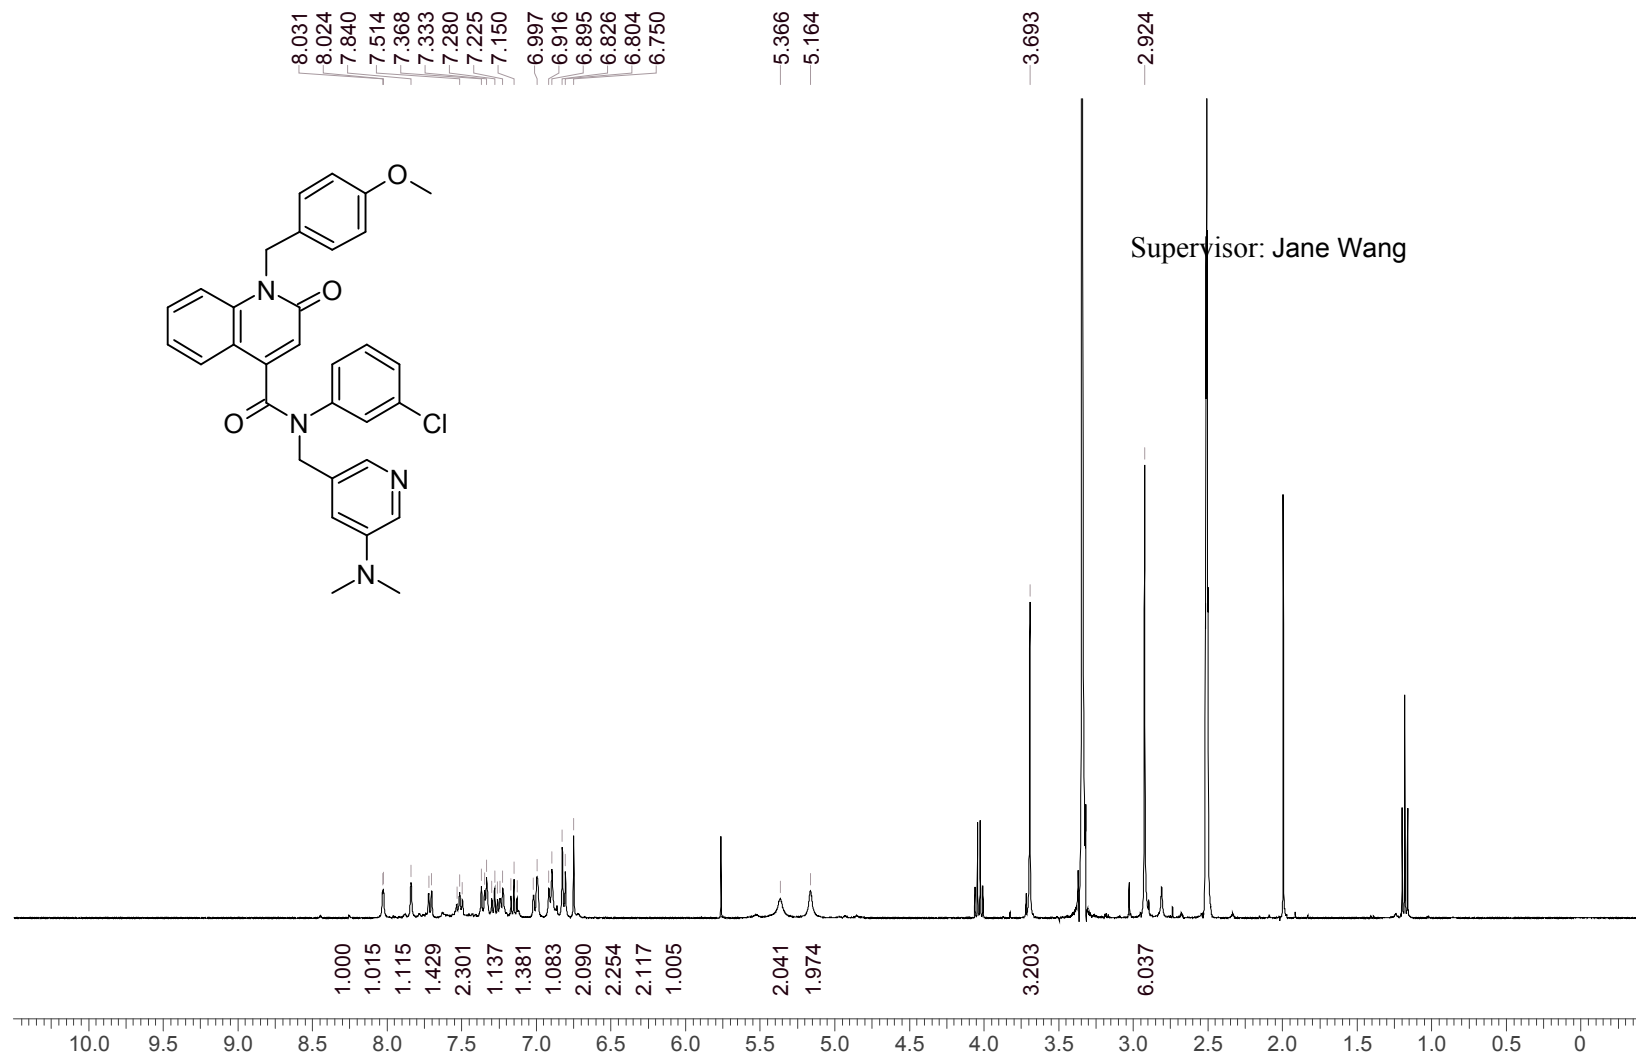

Supervisor: Jane Wang

|                        |                                                          |
|------------------------|----------------------------------------------------------|
| Acquisition Time (sec) | 1.9999                                                   |
| Comment                | EB2224-1<br>91-P1A<br>DMSO<br>Bruker_N<br>T-A_400M<br>HZ |
| Date                   | 27 Oct<br>2020<br>05:06:17                               |
| Frequency (MHz)        | 400.1500                                                 |
| Nucleus                | <sup>1</sup> H                                           |
| Number of Transients   | 8                                                        |
| Origin                 | Avance                                                   |
| Original Points Count  | 16393                                                    |
| Owner                  | nmrsu                                                    |
| Points Count           | 65536                                                    |
| Pulse Sequence         | zg30                                                     |
| Receiver Gain          | 101.00                                                   |
| SW(cyclical) (Hz)      | 8196.72                                                  |
| Solvent                | DMSO-d6                                                  |
| Spectrum Offset (Hz)   | 2471.2373                                                |
| Spectrum Type          | standard                                                 |
| Sweep Width (Hz)       | 8196.60                                                  |
| Temperature (deg C)    | 34.193                                                   |

<sup>1</sup>H NMR (400 MHz, DMSO-d<sub>6</sub>) δ = 8.03 (d, *J*=2.6 Hz, 1H), 7.84 (s, 1H), 7.71 (d, *J*=7.0 Hz, 1H), 7.54 - 7.48 (m, 1H), 7.38 - 7.32 (m, 2H), 7.28 (t, *J*=7.8 Hz, 1H), 7.25 - 7.21 (m, 1H), 7.15 (t, *J*=8.0 Hz, 1H), 7.18 - 7.13 (m, 1H), 7.04 - 6.97 (m, 2H), 6.93 - 6.88 (m, 2H), 6.85 - 6.79 (m, 2H), 6.75 (s, 1H), 5.37 (br s, 2H), 5.16 (br s, 2H), 3.69 (s, 3H), 2.92 (s, 6H).

Confidential. For research only Not for regulatory filing

Operator:

Date:
