# Supplementary material for: Discovery of SARS-CoV-2 main protease inhibitors using a synthesis-directed de novo design model
Source: Royal Society of Chemistry journal article supplement (doi:10.1039/d1cc00050k), 2021-01-01
Supplement: d1cc00050k1.zip [file ALP-POS-ddb41b15-4.pdf › new_ESI/spectroscopic_data/compound1/ALP-POS-ddb41b15-4.pdf]

Compound ID: ALP-POS-ddb41b15-4

EB2224-34-P1B MeOD Bruker\_NT-C\_400MHz

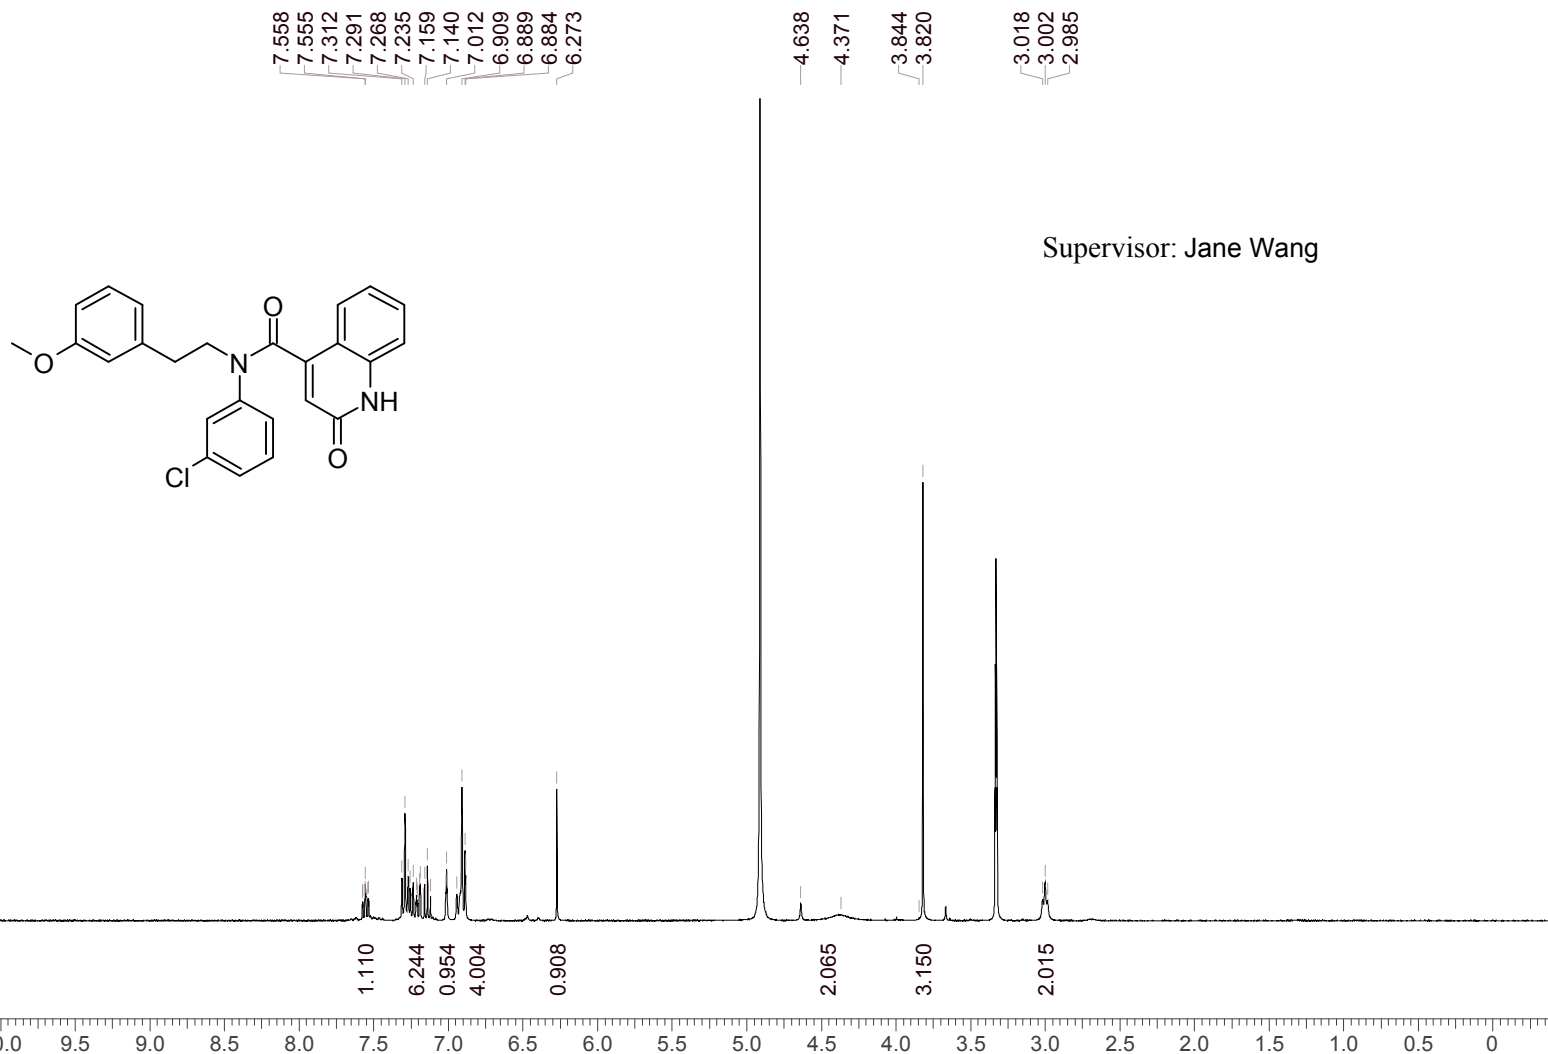

Supervisor: Jane Wang

|                        |                                                         |
|------------------------|---------------------------------------------------------|
| Acquisition Time (sec) | 1.9999                                                  |
| Comment                | EB2224-3<br>4-P1B<br>MeOD<br>Bruker_N<br>T-C_400M<br>Hz |
| Date                   | 26 Jul<br>2020<br>11:01:03                              |
| Frequency (MHz)        | 400.1400                                                |
| Nucleus                | <sup>1</sup> H                                          |
| Number of Transients   | 8                                                       |
| Origin                 | Avance                                                  |
| Original Points Count  | 16393                                                   |
| Owner                  | nmrsu                                                   |
| Points Count           | 65536                                                   |
| Pulse Sequence         | zg30                                                    |
| Receiver Gain          | 101.00                                                  |
| SW(cyclical) (Hz)      | 8196.72                                                 |
| Solvent                | METHANOL-d <sub>4</sub>                                 |
| Spectrum Offset (Hz)   | 2400.8411                                               |
| Spectrum Type          | standard                                                |
| Sweep Width (Hz)       | 8196.60                                                 |
| Temperature (degree C) | 21.663                                                  |

<sup>1</sup>H NMR (400MHz, METHANOL-d<sub>4</sub>) δ = 7.56 (ddd, *J*=1.5, 7.0, 8.3 Hz, 1H), 7.32 - 7.11 (m, 6H), 7.01 (t, *J*=1.9 Hz, 1H), 6.95 - 6.88 (m, 4H), 6.27 (s, 1H), 4.66 - 4.26 (m, 2H), 3.82 (s, 3H), 3.00 (br t, *J*=6.7 Hz, 2H)

# LCMS REPORT

Print time : 07/24/2020 17:01:48  
Compound ID : ALP-POS-ddb41b15-4  
Sample ID : EB2224-34-P1B  
Injection Date : 7/24/2020 4:59:58 PM  
Injection Vol : 2ul  
Location : tray1 vail10  
Acq Method : 5-95AB\_1.5min\_220&254\_Shimadzu.lcm  
Org DataFile : D:\DATA\2020\2007\200724\EB2224-34-P1B.lcd  
Instrument & column: LCMS-SAW 1-2402  
Chromolith Flash RP-18, 5um,3.0\*25mm

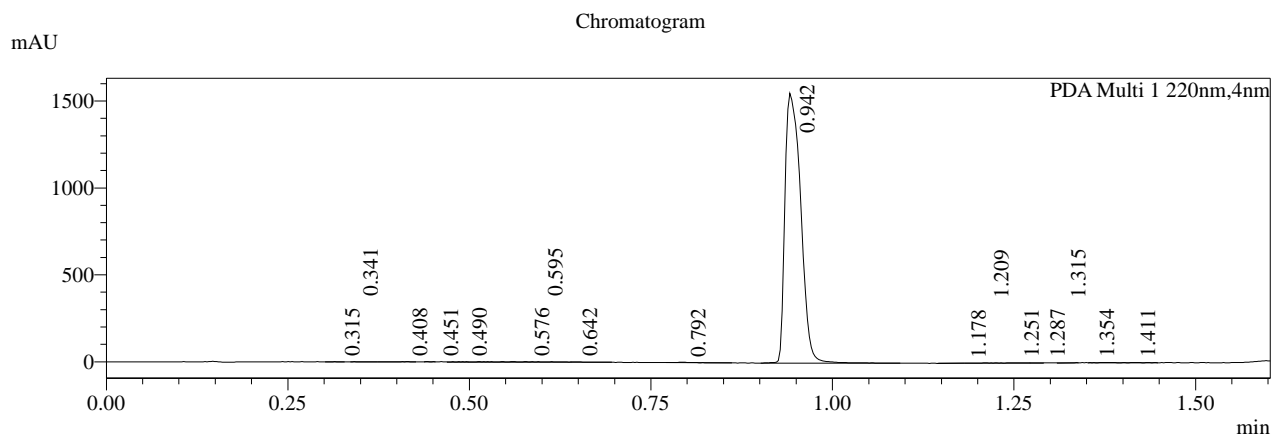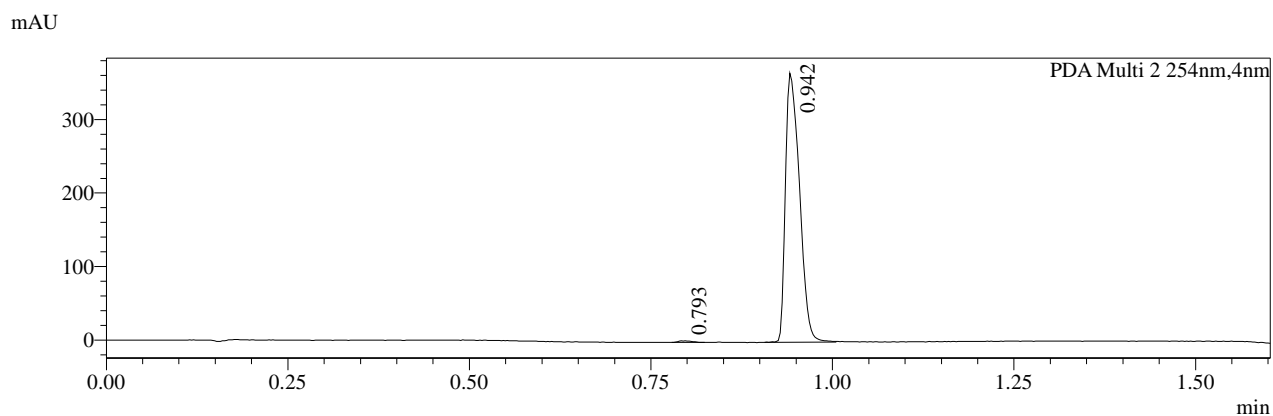

- 1 PDA Multi 1 / 220nm,4nm
- 2 PDA Multi 2 / 254nm,4nm

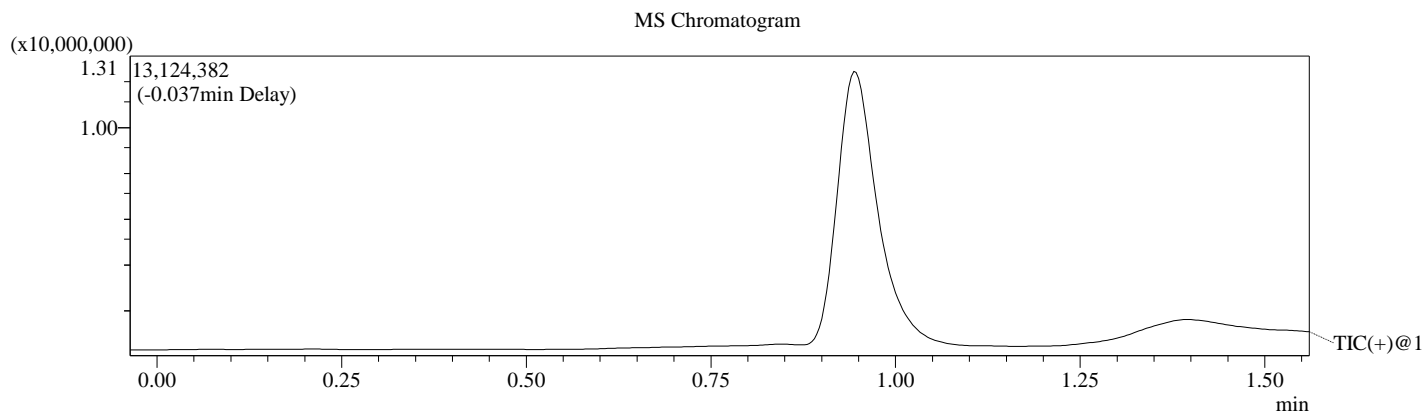

Integration Result

## PDA Ch1 220nm

| Peak# | Ret. Time | Height  | Height% | USP Width | Area    | Area%  |
|-------|-----------|---------|---------|-----------|---------|--------|
| 1     | 0.315     | 1179    | 0.074   | 0.031     | 1102    | 0.046  |
| 2     | 0.341     | 1526    | 0.096   | 0.009     | 1468    | 0.061  |
| 3     | 0.408     | 2072    | 0.131   | 0.064     | 3606    | 0.150  |
| 4     | 0.451     | 2010    | 0.127   | 0.018     | 1451    | 0.060  |
| 5     | 0.490     | 2662    | 0.168   | 0.056     | 3213    | 0.133  |
| 6     | 0.576     | 3174    | 0.200   | 0.170     | 12474   | 0.518  |
| 7     | 0.595     | 3163    | 0.200   | 0.410     | 8047    | 0.334  |
| 8     | 0.642     | 2136    | 0.135   | 0.078     | 3677    | 0.153  |
| 9     | 0.792     | 3370    | 0.213   | 0.040     | 4876    | 0.203  |
| 10    | 0.942     | 1551423 | 97.888  | 0.043     | 2347069 | 97.489 |
| 11    | 1.178     | 1301    | 0.082   | 0.073     | 1925    | 0.080  |
| 12    | 1.209     | 1553    | 0.098   | 0.104     | 3902    | 0.162  |
| 13    | 1.251     | 2081    | 0.131   | 0.050     | 3269    | 0.136  |
| 14    | 1.287     | 1673    | 0.106   | 0.074     | 1699    | 0.071  |
| 15    | 1.315     | 1866    | 0.118   | 0.040     | 2686    | 0.112  |
| 16    | 1.354     | 2170    | 0.137   | 0.053     | 3943    | 0.164  |
| 17    | 1.411     | 1543    | 0.097   | 0.052     | 3105    | 0.129  |

## PDA Ch2 254nm

| Peak# | Ret. Time | Height | Height% | USP Width | Area   | Area%  |
|-------|-----------|--------|---------|-----------|--------|--------|
| 1     | 0.793     | 2150   | 0.584   | 0.040     | 2886   | 0.579  |
| 2     | 0.942     | 365948 | 99.416  | 0.040     | 495606 | 99.421 |

Operator:\_\_\_\_\_

Date:\_\_\_\_\_

Mass Spectrum  
RetTime: 0.943 Datafile: D:\DATA\2020\2007\200724\EB2224-34-PIB.lcd

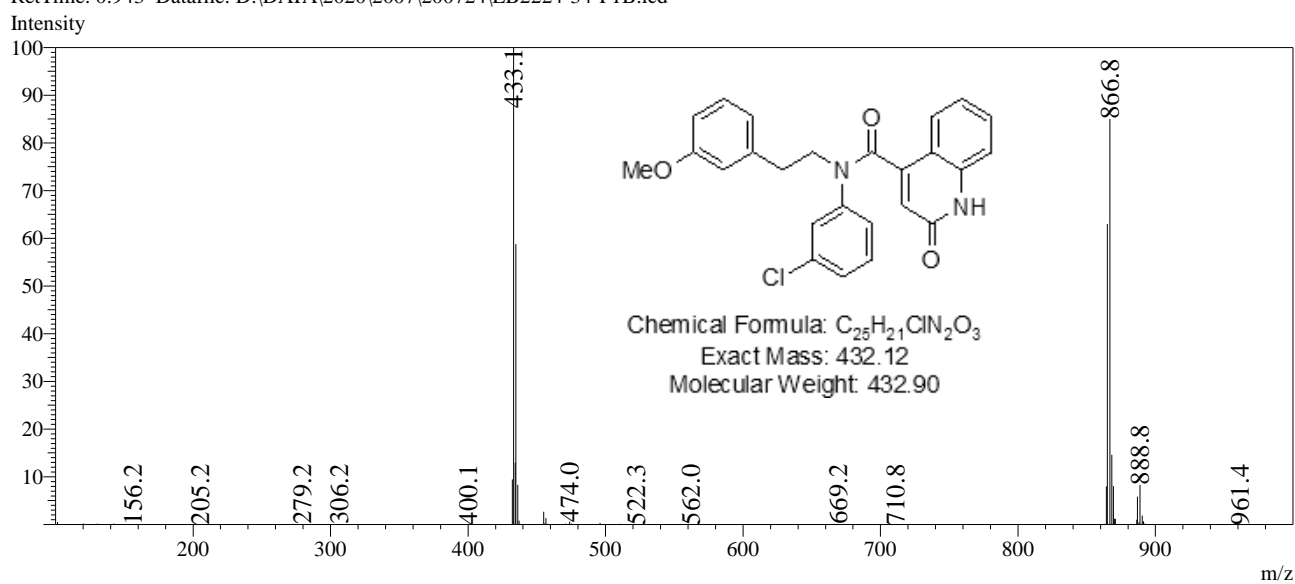

Confidential. For research information only

## ===== HPLC Analysis Report =====

Sample ID : EB2224-34-P1C  
Compound ID : ALP-POS-ddb41b15-4  
Injection Date : 7/24/2020 4:30:54 PM  
Injection Volume : 2 uL  
Location : Vial 81  
Org Data File : D:\DATA\2020\2007\200724\EB2224-34-P1C.lcd  
Method File Name : 10-80AB\_8min\_220&254.lcm  
Instrument&Column : HPLC-SAI 1-2402 Xtimate C18 2.1\*30mm 3um

## &lt;Chromatogram&gt;

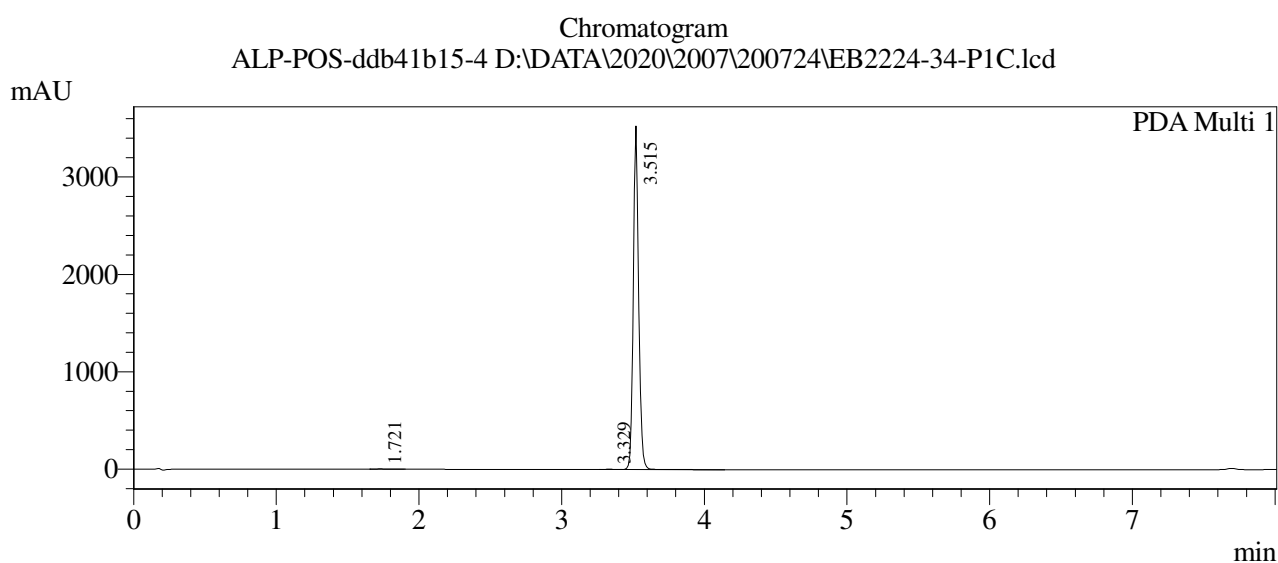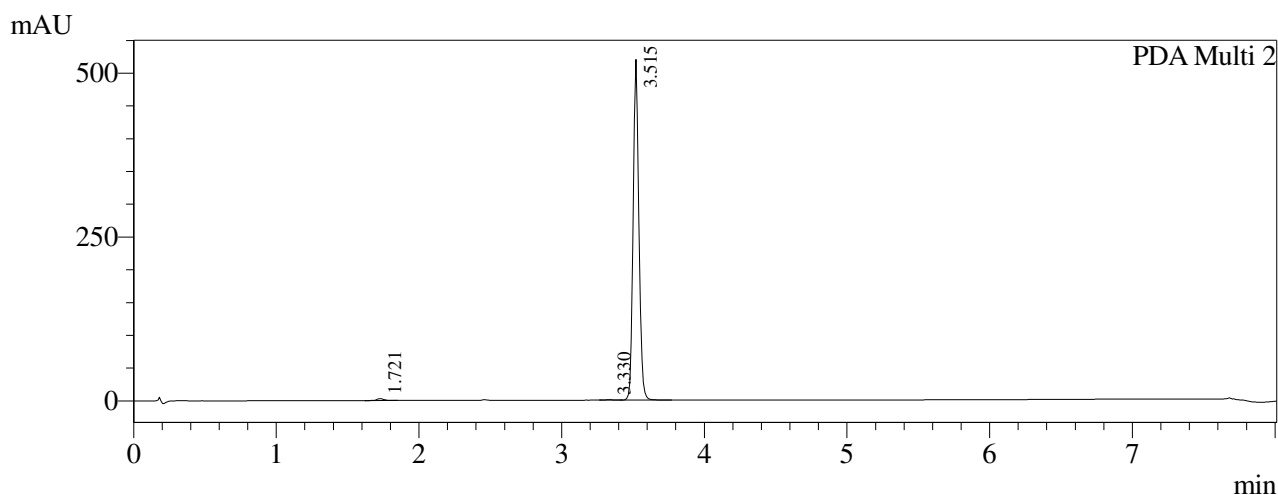

- 1 PDA Multi 1 / 220nm 4nm  
2 PDA Multi 2 / 254nm 4nm

## ===== Integration Result =====

PeakTable

Ch1 220nm 4nm

| Peak# | Ret. Time | Height  | Height % | Area    | Area %  |
|-------|-----------|---------|----------|---------|---------|
| 1     | 1.721     | 3809    | 0.108    | 12525   | 0.136   |
| 2     | 3.329     | 4629    | 0.131    | 12715   | 0.138   |
| 3     | 3.515     | 3527699 | 99.761   | 9205901 | 99.727  |
| Total |           | 3536137 | 100.000  | 9231141 | 100.000 |

PeakTable

Ch2 254nm 4nm

| Peak# | Ret. Time | Height | Height % | Area    | Area %  |
|-------|-----------|--------|----------|---------|---------|
| 1     | 1.721     | 2878   | 0.550    | 9559    | 0.651   |
| 2     | 3.330     | 830    | 0.159    | 2325    | 0.158   |
| 3     | 3.515     | 519715 | 99.292   | 1455706 | 99.190  |
| Total |           | 523422 | 100.000  | 1467589 | 100.000 |

PeakTable

Ch3

Operator:\_\_\_\_\_

Data:\_\_\_\_\_
