# Supplementary material for: Discovery of SARS-CoV-2 main protease inhibitors using a synthesis-directed de novo design model
Source: Royal Society of Chemistry journal article supplement (doi:10.1039/d1cc00050k), 2021-01-01
Supplement: d1cc00050k1.zip [file ALP-POS-ddb41b15-4_intermediate2.pdf › new_ESI/spectroscopic_data/compound1/ALP-POS-ddb41b15-4_intermediate2.pdf]

Compound ID: 00000000

EB2224-19-P1A CDCl3 Bruker\_NT-A\_400MHZ

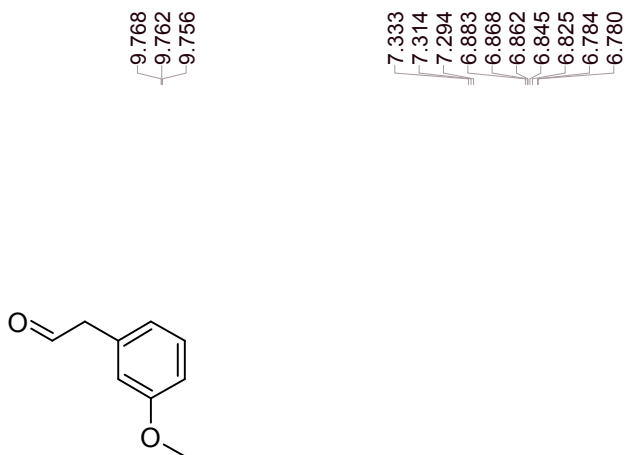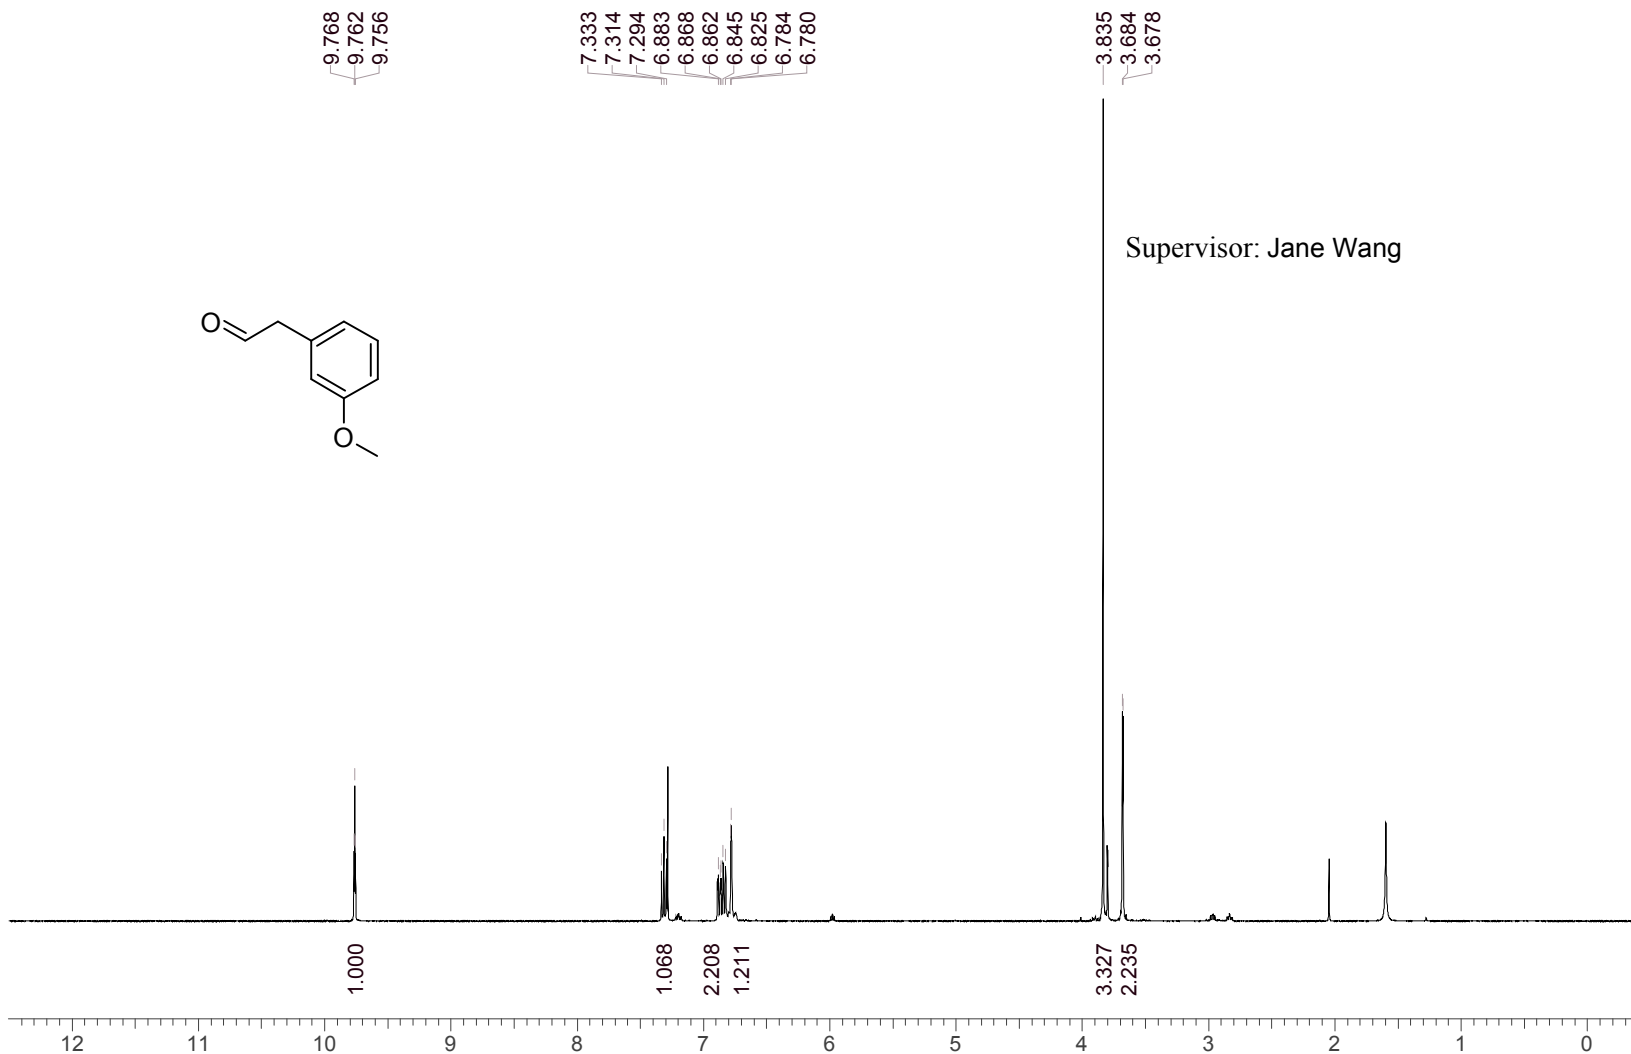

Supervisor: Jane Wang

|                        |                                                          |
|------------------------|----------------------------------------------------------|
| Acquisition Time (sec) | 1.9999                                                   |
| Comment                | EB2224-1<br>9-P1A<br>CDCl3<br>Bruker_N<br>T-A_400M<br>HZ |
| Date                   | 17 Jul<br>2020<br>03:57:45                               |
| Frequency (MHz)        | 400.1500                                                 |
| Nucleus                | <sup>1</sup> H                                           |
| Number of Transients   | 8                                                        |
| Origin                 | Avance                                                   |
| Original Points Count  | 16393                                                    |
| Owner                  | nmrsu                                                    |
| Points Count           | 65536                                                    |
| Pulse Sequence         | zg30                                                     |
| Receiver Gain          | 101.00                                                   |
| SW(cyclical) (Hz)      | 8196.72                                                  |
| Solvent                | CHLORO<br>FORM-d                                         |
| Spectrum Offset (Hz)   | 2471.2373                                                |
| Spectrum Type          | standard                                                 |
| Sweep Width (Hz)       | 8196.60                                                  |
| Temperature (degree C) | -273.000                                                 |

<sup>1</sup>H NMR (400MHz, CHLOROFORM-d)  $\delta$  = 9.76 (t,  $J$ =2.4 Hz, 1H), 7.31 (t,  $J$ =7.9 Hz, 1H), 6.91 - 6.81 (m, 2H), 6.78 (d,  $J$ =1.5 Hz, 1H), 3.84 (s, 3H), 3.68 (d,  $J$ =2.4 Hz, 2H)

Confidential. For research only Not for regulatory filing

Operator:

Date:
