# Supplementary material for: Discovery of SARS-CoV-2 main protease inhibitors using a synthesis-directed de novo design model
Source: Royal Society of Chemistry journal article supplement (doi:10.1039/d1cc00050k), 2021-01-01
Supplement: d1cc00050k1.zip [file ALP-POS-ddb41b15-4_intermediate4.pdf › new_ESI/spectroscopic_data/compound1/ALP-POS-ddb41b15-4_intermediate4.pdf]

Compound ID: 00000000

EB2224-22-P1A CDCl3 Bruker\_NT-C\_400MHz

7.171  
7.152  
6.993  
6.973  
6.745  
6.727  
6.683  
6.577  
6.514  
6.509  
6.504  
6.403

3.731  
3.323  
3.306  
3.288  
2.832  
2.815  
2.797

Supervisor: Jane Wang

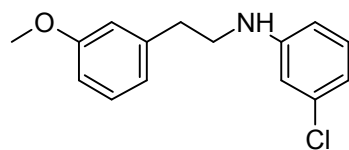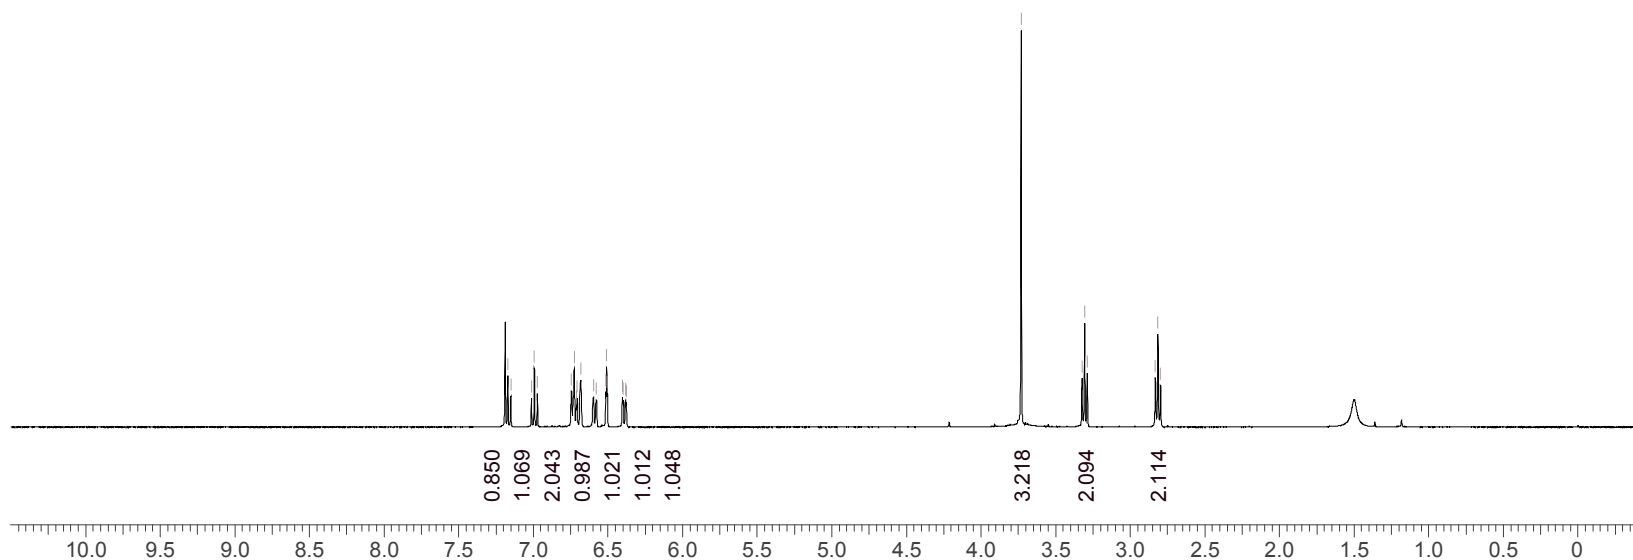

|                                                                                                                                                                                                                                                                                                                        |                                                          |
|------------------------------------------------------------------------------------------------------------------------------------------------------------------------------------------------------------------------------------------------------------------------------------------------------------------------|----------------------------------------------------------|
| Acquisition Time (sec)                                                                                                                                                                                                                                                                                                 | 1.9999                                                   |
| Comment                                                                                                                                                                                                                                                                                                                | EB2224-2<br>2-P1A<br>CDCl3<br>Bruker_N<br>T-C_400M<br>Hz |
| Date                                                                                                                                                                                                                                                                                                                   | 19 Jul<br>2020<br>09:45:53                               |
| Frequency (MHz)                                                                                                                                                                                                                                                                                                        | 400.1400                                                 |
| Nucleus                                                                                                                                                                                                                                                                                                                | 1H                                                       |
| Number of Transients                                                                                                                                                                                                                                                                                                   | 8                                                        |
| Origin                                                                                                                                                                                                                                                                                                                 | Avance                                                   |
| Original Points Count                                                                                                                                                                                                                                                                                                  | 16393                                                    |
| Owner                                                                                                                                                                                                                                                                                                                  | nmrsu                                                    |
| Points Count                                                                                                                                                                                                                                                                                                           | 65536                                                    |
| Pulse Sequence                                                                                                                                                                                                                                                                                                         | zg30                                                     |
| Receiver Gain                                                                                                                                                                                                                                                                                                          | 101.00                                                   |
| SW(cyclical) (Hz)                                                                                                                                                                                                                                                                                                      | 8196.72                                                  |
| Solvent                                                                                                                                                                                                                                                                                                                | CHLORO<br>FORM-d                                         |
| Spectrum Offset (Hz)                                                                                                                                                                                                                                                                                                   | 2362.5042                                                |
| Spectrum Type                                                                                                                                                                                                                                                                                                          | standard                                                 |
| Sweep Width (Hz)                                                                                                                                                                                                                                                                                                       | 8196.60                                                  |
| Temperature (degree C)                                                                                                                                                                                                                                                                                                 | 23.170                                                   |
| <sup>1</sup> H NMR (400MHz,<br>CHLOROFORM-d) $\delta$ = 7.19 - 7.14<br>(m, 1H), 6.99 (t, $J$ =8.1 Hz, 1H), 6.76<br>- 6.70 (m, 2H), 6.68 (s, 1H), 6.59 (d,<br>$J$ =7.8 Hz, 1H), 6.51 (t, $J$ =2.1 Hz,<br>1H), 6.39 (dd, $J$ =2.1, 8.1 Hz, 1H),<br>3.73 (s, 3H), 3.31 (t, $J$ =6.9 Hz, 2H),<br>2.81 (t, $J$ =6.9 Hz, 2H) |                                                          |

Confidential. For research only Not for regulatory filing

Operator:

Date:
