# Supplementary material for: Discovery of SARS-CoV-2 main protease inhibitors using a synthesis-directed de novo design model
Source: Royal Society of Chemistry journal article supplement (doi:10.1039/d1cc00050k), 2021-01-01
Supplement: d1cc00050k1.zip [file ALP-POS-ddb41b15-8.pdf › new_ESI/spectroscopic_data/compound5/ALP-POS-ddb41b15-8.pdf]

Compound ID: ALP-POS-ddb41b15-8

EB2224-107-P1A DMSO Bruker\_NT-C\_400MHz

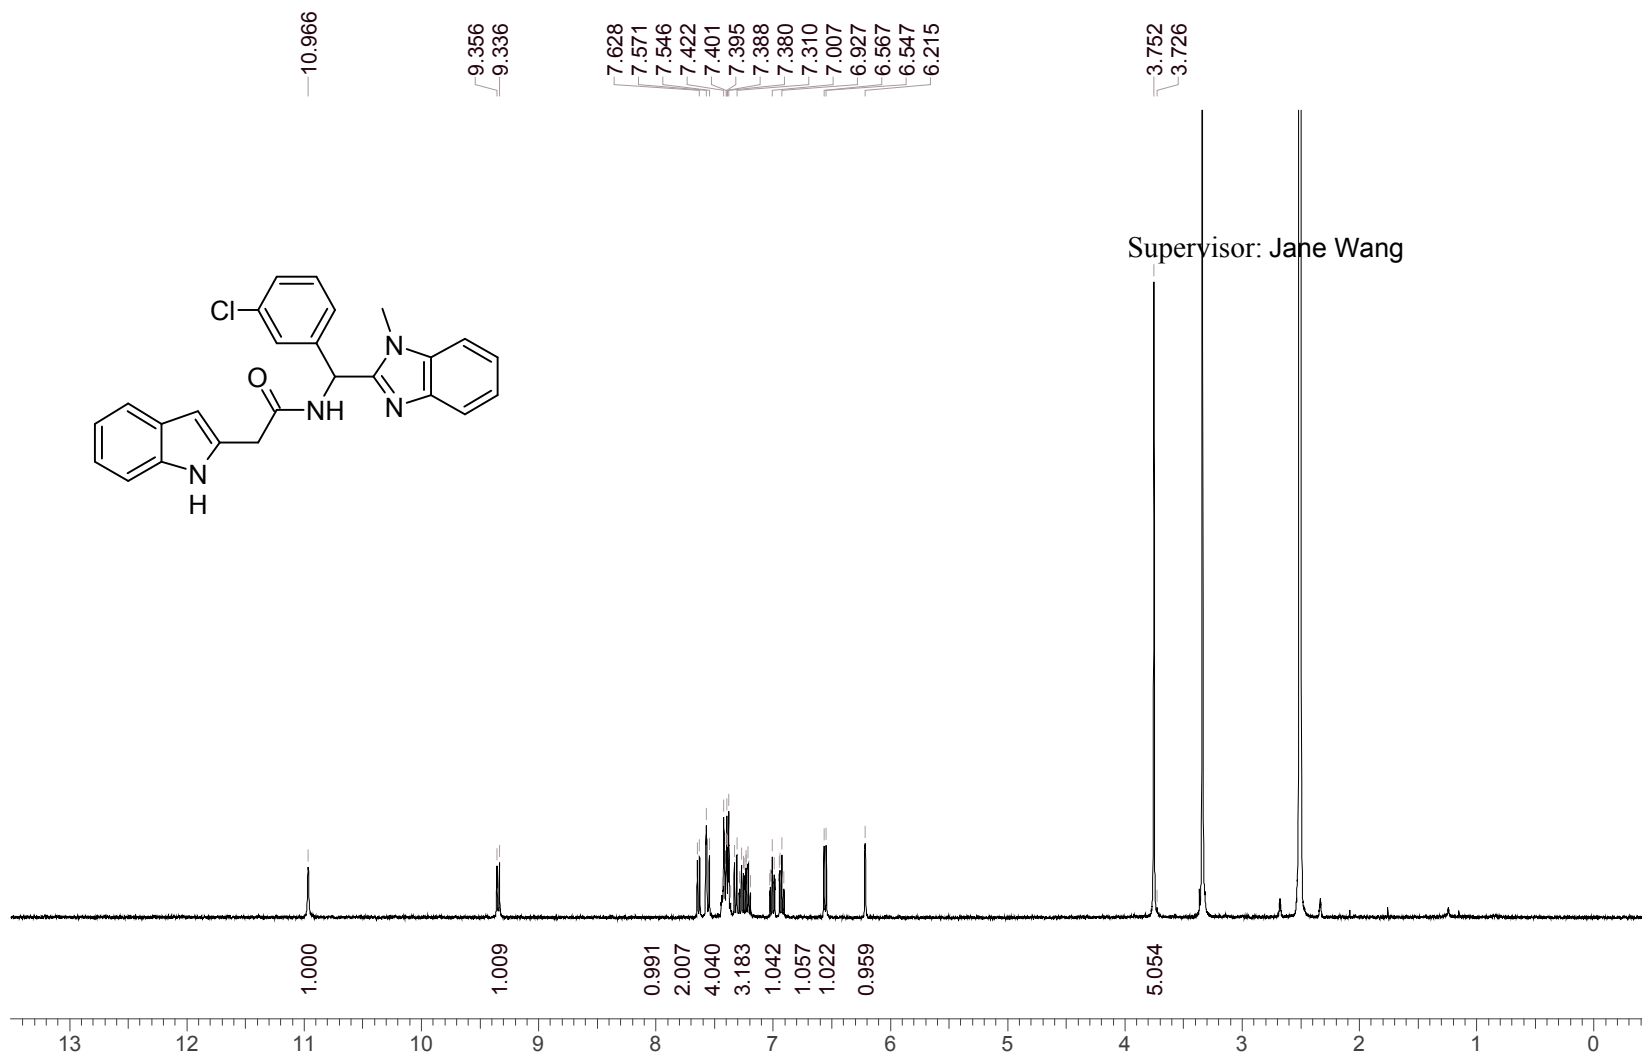

|                        |                                                          |
|------------------------|----------------------------------------------------------|
| Acquisition Time (sec) | 1.9999                                                   |
| Comment                | EB2224-1<br>07-P1A<br>DMSO<br>Bruker_N<br>T-C_400M<br>Hz |
| Date                   | 31 Aug<br>2020<br>12:55:02                               |
| Frequency (MHz)        | 400.1400                                                 |
| Nucleus                | <sup>1</sup> H                                           |
| Number of Transients   | 8                                                        |
| Origin                 | Avance                                                   |
| Original Points Count  | 16393                                                    |
| Owner                  | nmrsu                                                    |
| Points Count           | 65536                                                    |
| Pulse Sequence         | zg30                                                     |
| Receiver Gain          | 101.00                                                   |
| SW(cyclical) (Hz)      | 8196.72                                                  |
| Solvent                | DMSO-d <sub>6</sub>                                      |
| Spectrum Offset (Hz)   | 2400.8411                                                |
| Spectrum Type          | standard                                                 |
| Sweep Width (Hz)       | 8196.60                                                  |
| Temperature (degree C) | 21.827                                                   |

<sup>1</sup>H NMR (400MHz, DMSO-d<sub>6</sub>) δ =  
10.97 (s, 1H), 9.35 (d, *J*=8.0 Hz,  
1H), 7.64 (d, *J*=7.5 Hz, 1H), 7.59 -  
7.52 (m, 2H), 7.44 - 7.36 (m, 4H),  
7.34 - 7.19 (m, 3H), 7.04 - 6.97 (m,  
1H), 6.96 - 6.89 (m, 1H), 6.56 (d,  
*J*=8.1 Hz, 1H), 6.21 (s, 1H), 3.75 (s,  
5H)

Confidential. For research only Not for regulatory filing

Operator:

Date:

# LCMS REPORT

Print time : 08/31/2020 10:56:33  
Compound ID :ALP-POS-ddb41b15-8  
Sample ID : EB2224-107-P1C  
Injection Date :8/31/2020 10:54:31 AM  
Injection Vol : 6ul  
Location :tray1 vail48  
Acq Method :5-95AB\_1.5min\_220&254\_Shimadzu.lcm  
Org DataFile :D:\DATA\2020\2008\200831\EB2224-107-P1C.lcd  
Instrument & column:LCMS-SAW 1-2402  
Chromolith Flash RP-18, 5um,3.0\*25mm

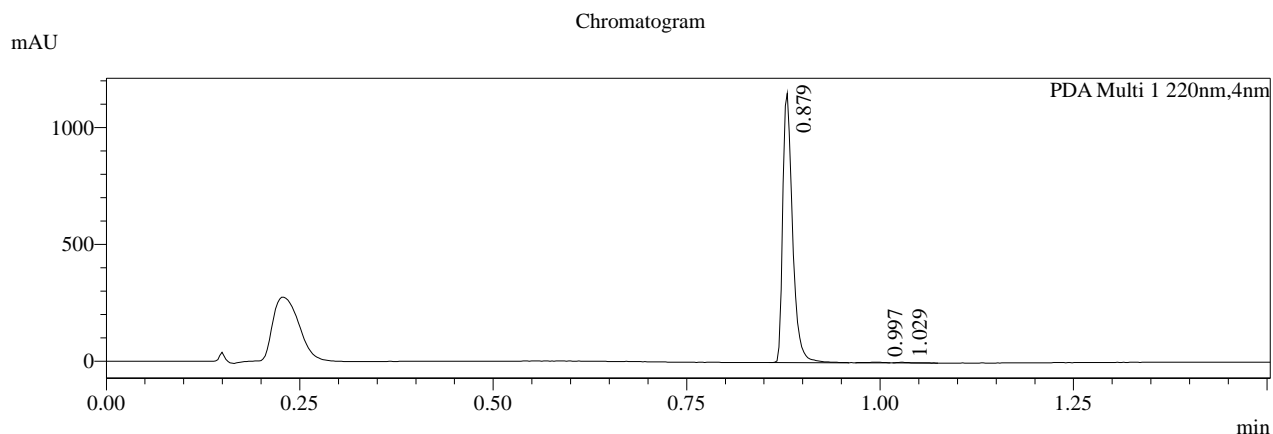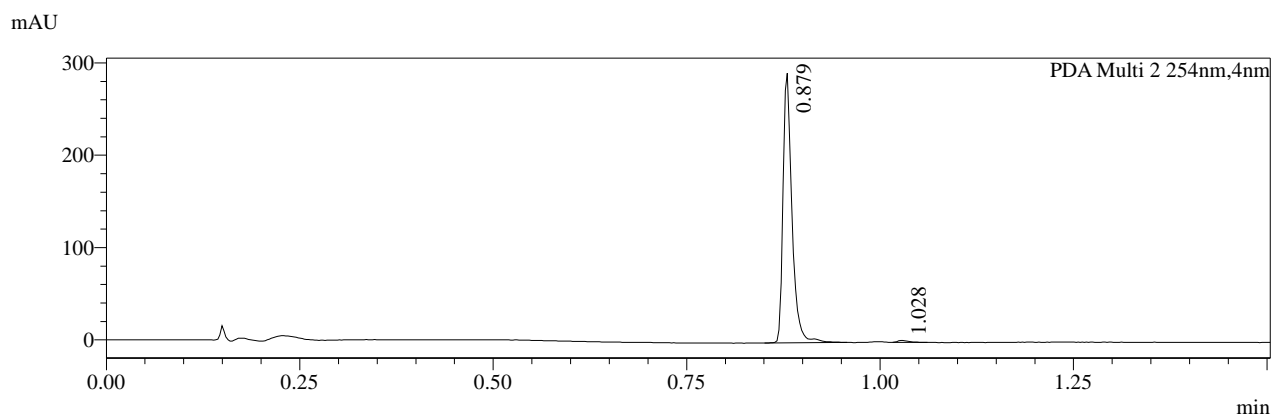

- 1 PDA Multi 1 / 220nm,4nm
- 2 PDA Multi 2 / 254nm,4nm

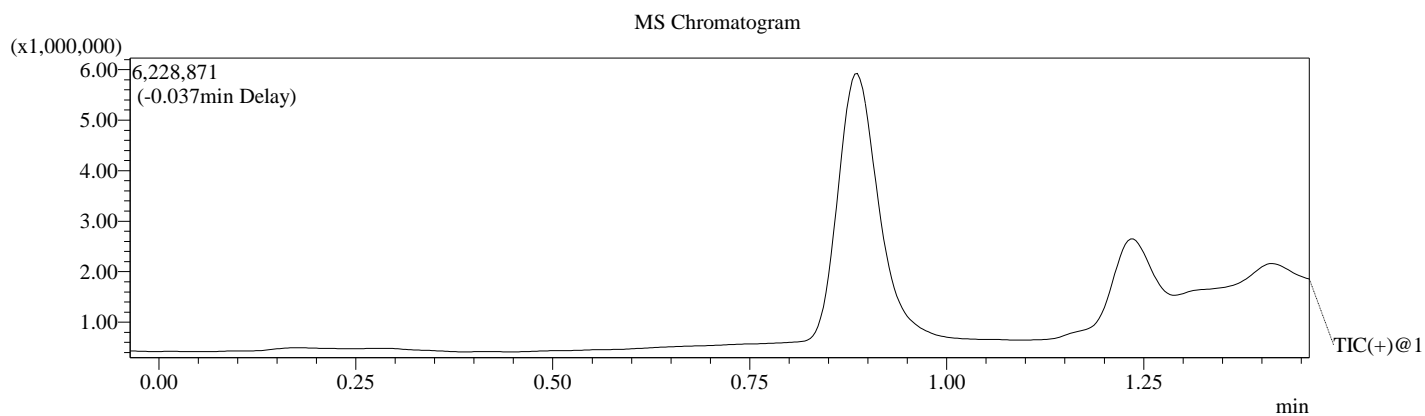

Integration Result

## PDA Ch1 220nm

| Peak# | Ret. Time | Height  | Height% | USP Width | Area    | Area%  |
|-------|-----------|---------|---------|-----------|---------|--------|
| 1     | 0.879     | 1152297 | 99.584  | 0.026     | 1022568 | 99.434 |
| 2     | 0.997     | 2021    | 0.175   | 0.044     | 2832    | 0.275  |
| 3     | 1.029     | 2796    | 0.242   | 0.029     | 2990    | 0.291  |

## PDA Ch2 254nm

| Peak# | Ret. Time | Height | Height% | USP Width | Area   | Area%  |
|-------|-----------|--------|---------|-----------|--------|--------|
| 1     | 0.879     | 292115 | 99.233  | 0.023     | 238162 | 99.004 |
| 2     | 1.028     | 2258   | 0.767   | 0.032     | 2397   | 0.996  |

Operator:\_\_\_\_\_

Date:\_\_\_\_\_

RetTime: 0.880 Datafile: D:\DATA\2020\2008\200831\EB2224-107-P1C.lcd

Mass Spectrum

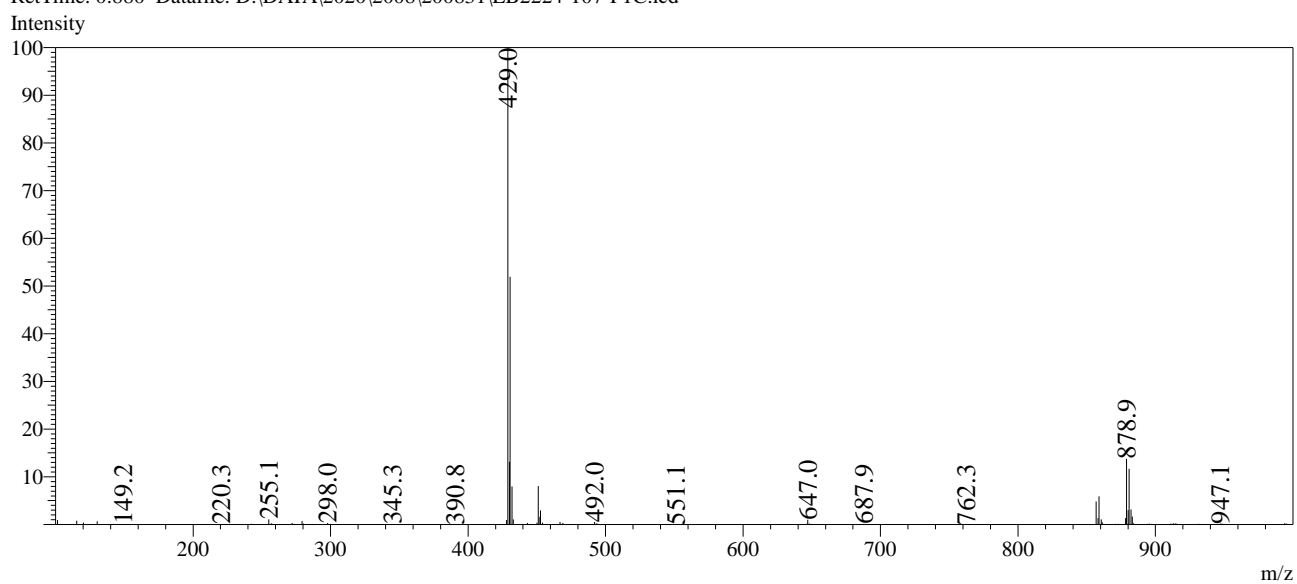

Confidential. For research information only

## ===== HPLC Analysis Report =====

Sample ID : EB2224-107-P1C2  
Compound ID : ALP-POS-ddb41b15-8  
Injection Date : 8/31/2020 11:42:31 AM  
Injection Volume : 6 uL  
Location : Vial 105  
Org Data File : D:\DATA\2020\2008\200831\EB2224-107-P1C2.lcd  
Method File Name : 10-80AB\_8min\_220&254.lcm  
Instrument&Column : HPLC-SAI 1-2402 Xtimate C18 2.1\*30mm 3um

## &lt;Chromatogram&gt;

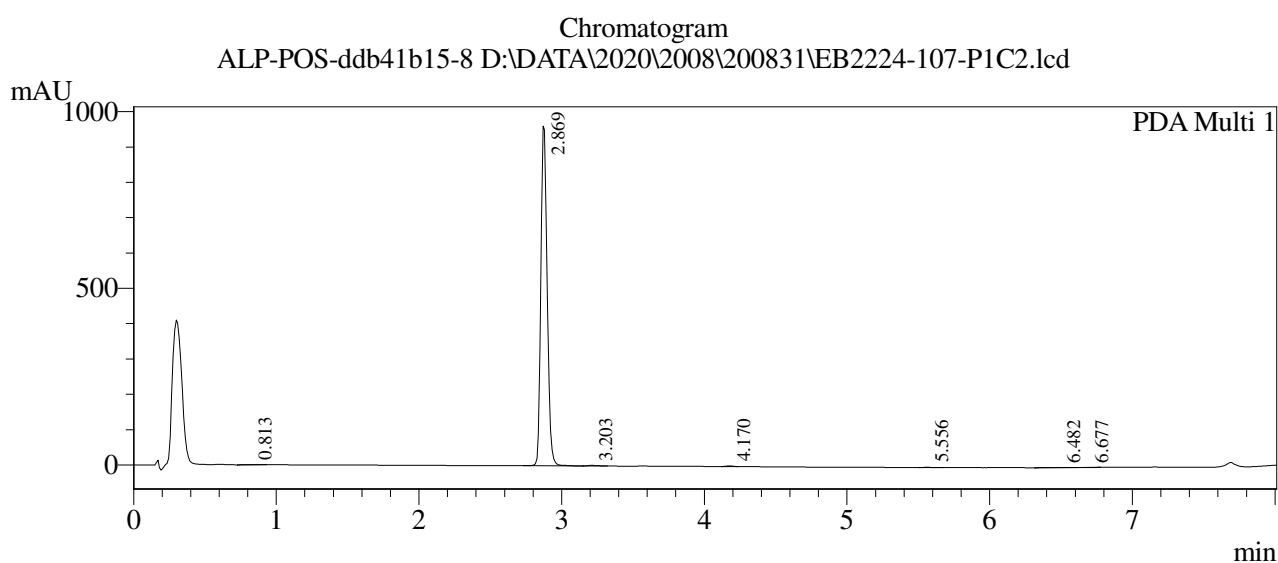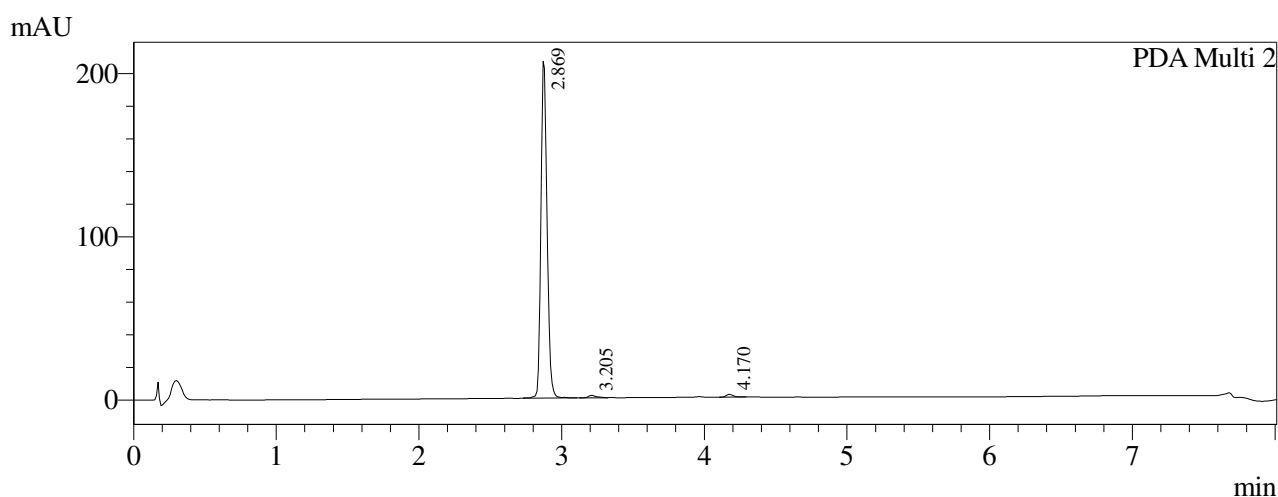

- 1 PDA Multi 1 / 220nm 4nm  
2 PDA Multi 2 / 254nm 4nm

## ===== Integration Result =====

PeakTable

Ch1 220nm 4nm

| Peak# | Ret. Time | Height | Height % | Area    | Area %  |
|-------|-----------|--------|----------|---------|---------|
| 1     | 0.813     | 797    | 0.082    | 4564    | 0.152   |
| 2     | 2.869     | 961435 | 99.318   | 2963437 | 98.977  |
| 3     | 3.203     | 1801   | 0.186    | 6987    | 0.233   |
| 4     | 4.170     | 2219   | 0.229    | 7021    | 0.235   |
| 5     | 5.556     | 680    | 0.070    | 2356    | 0.079   |
| 6     | 6.482     | 790    | 0.082    | 8033    | 0.268   |
| 7     | 6.677     | 312    | 0.032    | 1654    | 0.055   |
| Total |           | 968032 | 100.000  | 2994052 | 100.000 |

PeakTable

Ch2 254nm 4nm

| Peak# | Ret. Time | Height | Height % | Area   | Area %  |
|-------|-----------|--------|----------|--------|---------|
| 1     | 2.869     | 206124 | 98.387   | 616972 | 98.027  |
| 2     | 3.205     | 1582   | 0.755    | 6216   | 0.988   |
| 3     | 4.170     | 1797   | 0.858    | 6204   | 0.986   |
| Total |           | 209504 | 100.000  | 629392 | 100.000 |

PeakTable

Ch3

Operator:\_\_\_\_\_

Data:\_\_\_\_\_
