# Supplementary material for: Discovery of SARS-CoV-2 main protease inhibitors using a synthesis-directed de novo design model
Source: Royal Society of Chemistry journal article supplement (doi:10.1039/d1cc00050k), 2021-01-01
Supplement: d1cc00050k1.zip [file ALP-POS-ddb41b15-8_intermediate3.pdf › new_ESI/spectroscopic_data/compound5/ALP-POS-ddb41b15-8_intermediate3.pdf]

Compound ID: 00000000

EB2224-64-P1A DMSO Bruker\_NT-B\_400MHZ

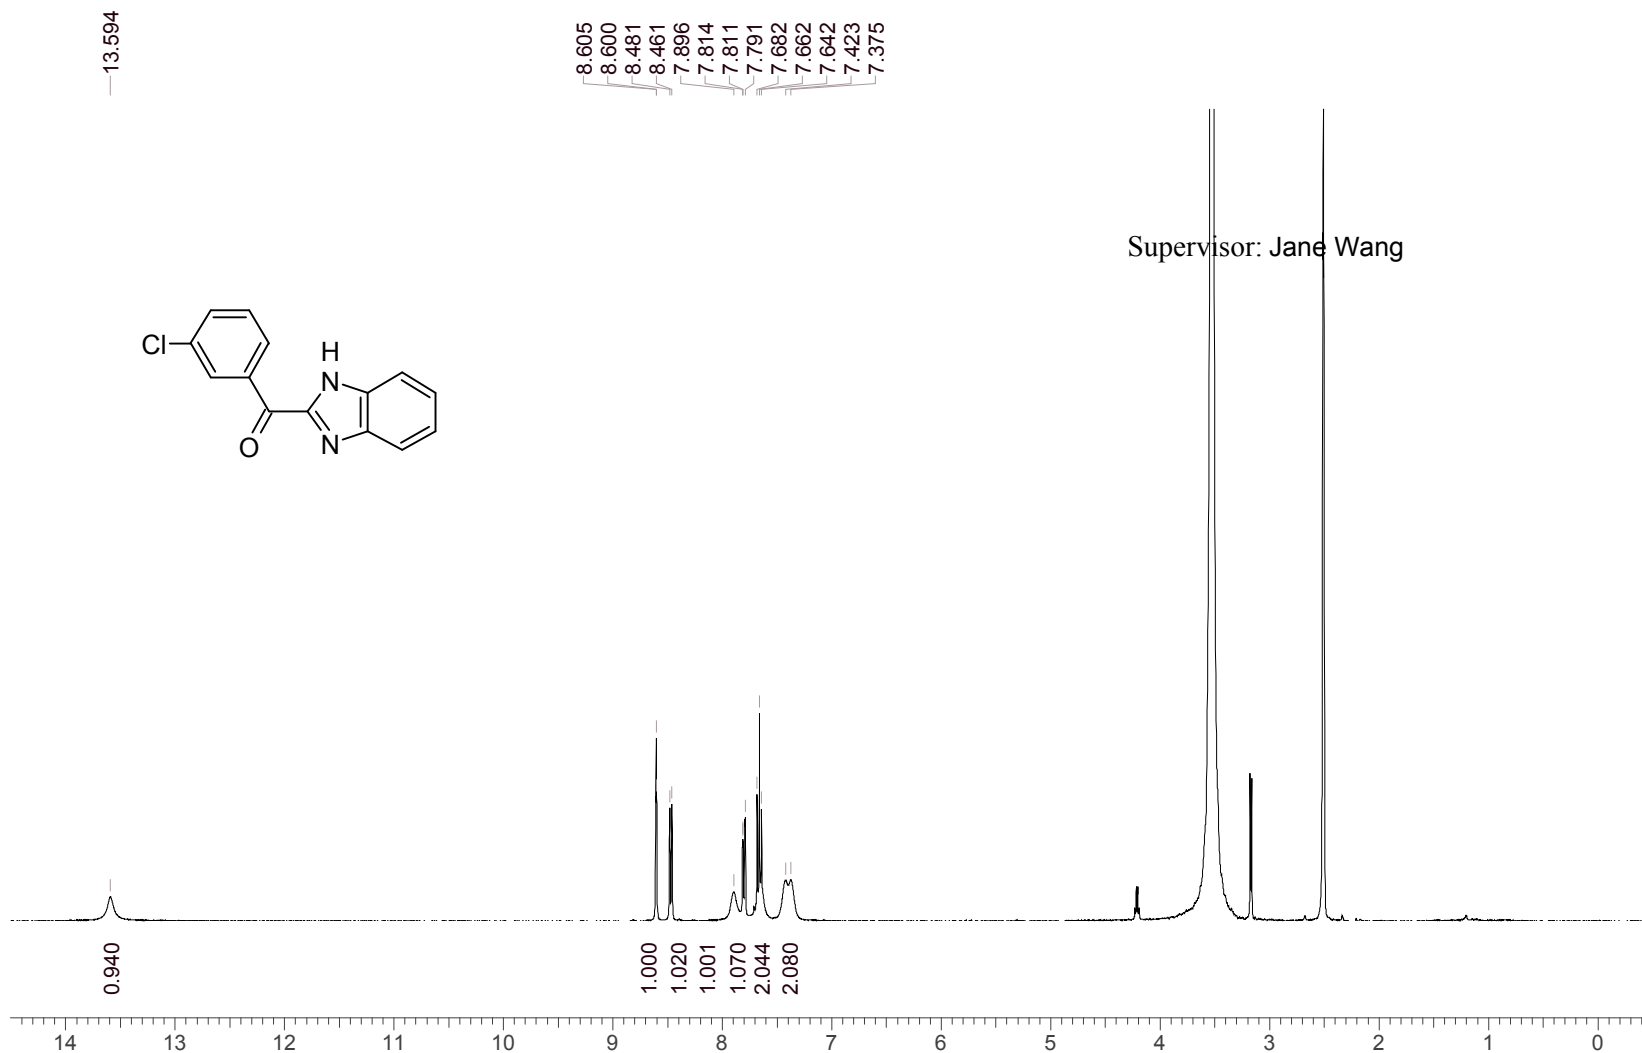

|                        |                                                         |
|------------------------|---------------------------------------------------------|
| Acquisition Time (sec) | 3.9977                                                  |
| Comment                | EB2224-6<br>4-P1A<br>DMSO<br>Bruker_N<br>T-B_400M<br>HZ |
| Date                   | 10 Aug<br>2020<br>07:54:34                              |
| Frequency (MHz)        | 400.1300                                                |
| Nucleus                | <sup>1</sup> H                                          |
| Number of Transients   | 8                                                       |
| Origin                 | Avance                                                  |
| Original Points Count  | 32768                                                   |
| Owner                  | nmrsu                                                   |
| Points Count           | 65536                                                   |
| Pulse Sequence         | zg30                                                    |
| Receiver Gain          | 53.33                                                   |
| SW(cyclical) (Hz)      | 8196.72                                                 |
| Solvent                | DMSO-d6                                                 |
| Spectrum Offset (Hz)   | 2470.8015                                               |
| Spectrum Type          | standard                                                |
| Sweep Width (Hz)       | 8196.60                                                 |
| Temperature (degree C) | 25.637                                                  |

<sup>1</sup>H NMR (400MHz, DMSO-d<sub>6</sub>) δ =  
13.59 (br s, 1H), 8.60 (t, *J*=1.8 Hz,  
1H), 8.47 (d, *J*=7.9 Hz, 1H), 7.90  
(br s, 1H), 7.82 - 7.78 (m, 1H), 7.66  
(t, *J*=7.9 Hz, 2H), 7.40 (br d, *J*=19.4  
Hz, 2H)

Confidential. For research only Not for regulatory filing

Operator:

Date:
