# Supplementary material for: Discovery of SARS-CoV-2 main protease inhibitors using a synthesis-directed de novo design model
Source: Royal Society of Chemistry journal article supplement (doi:10.1039/d1cc00050k), 2021-01-01
Supplement: d1cc00050k1.zip [file ALP-POS-ddb41b15-8_intermediate4.pdf › new_ESI/spectroscopic_data/compound5/ALP-POS-ddb41b15-8_intermediate4.pdf]

Compound ID: 00000000

EB2224-75-P1A DMSO Bruker\_NT-C\_400MHz

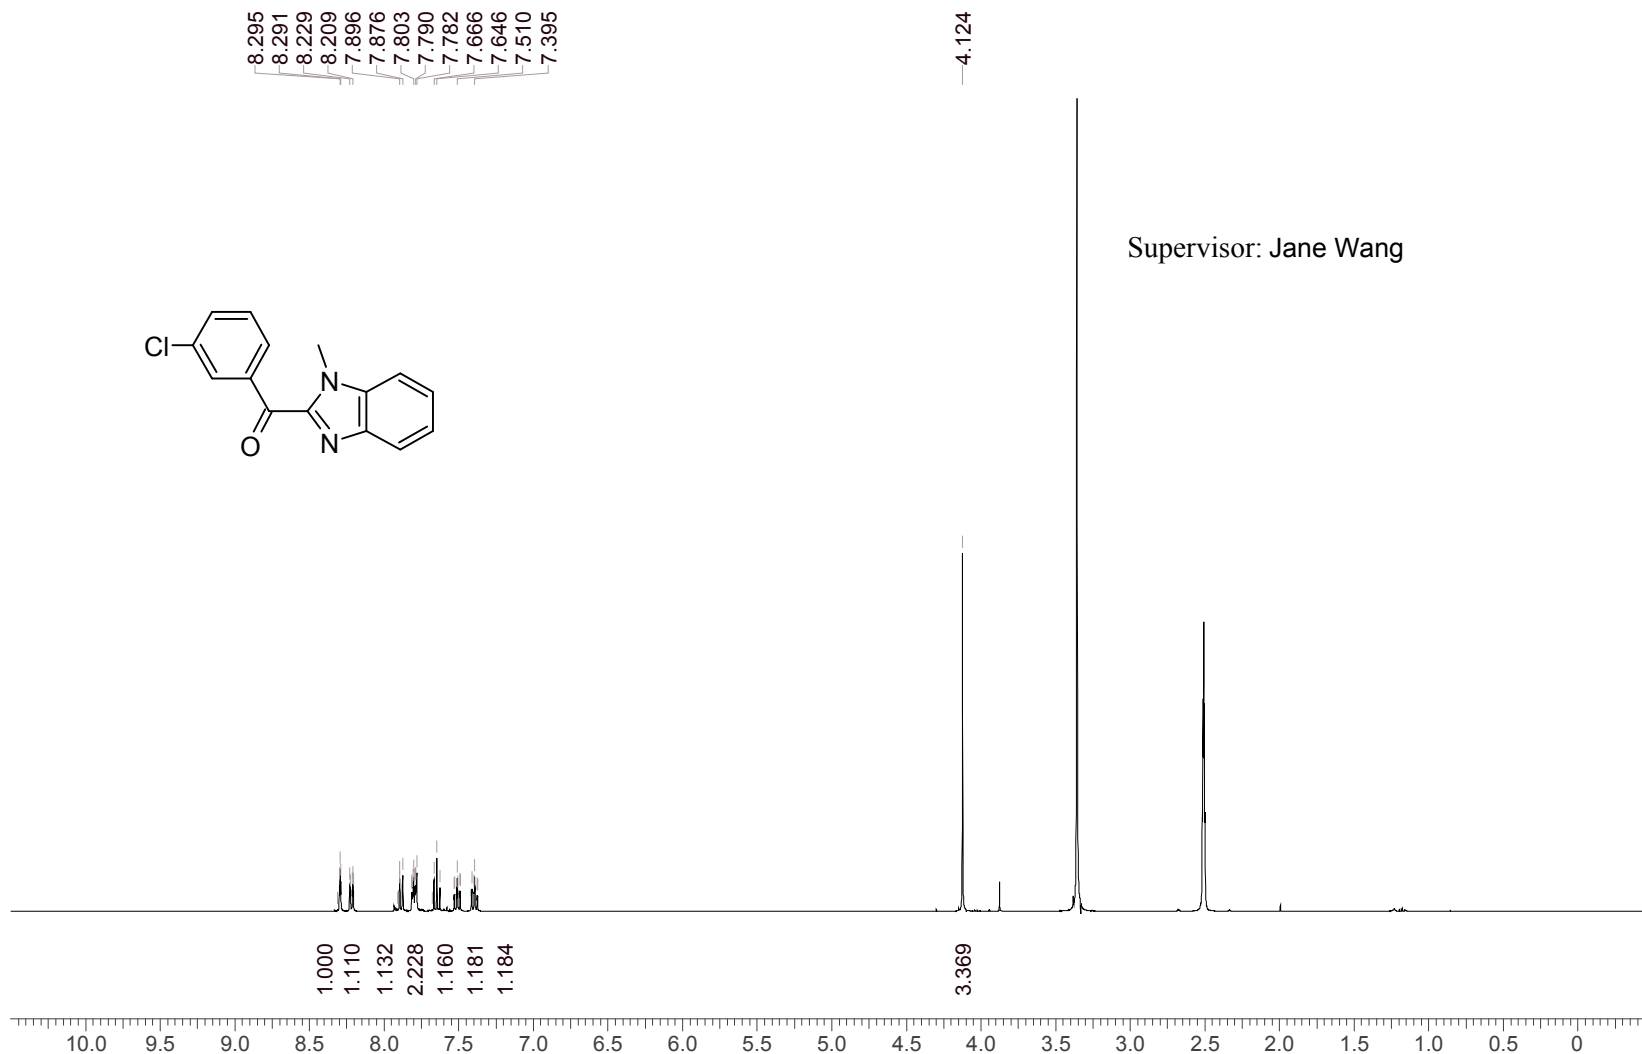

|                        |                                                         |
|------------------------|---------------------------------------------------------|
| Acquisition Time (sec) | 1.9999                                                  |
| Comment                | EB2224-7<br>5-P1A<br>DMSO<br>Bruker_N<br>T-C_400M<br>Hz |
| Date                   | 17 Aug<br>2020<br>09:45:06                              |
| Frequency (MHz)        | 400.1400                                                |
| Nucleus                | <sup>1</sup> H                                          |
| Number of Transients   | 8                                                       |
| Origin                 | Avance                                                  |
| Original Points Count  | 16393                                                   |
| Owner                  | nmrsu                                                   |
| Points Count           | 65536                                                   |
| Pulse Sequence         | zg30                                                    |
| Receiver Gain          | 101.00                                                  |
| SW(cyclical) (Hz)      | 8196.72                                                 |
| Solvent                | DMSO-d6                                                 |
| Spectrum Offset (Hz)   | 2400.8411                                               |
| Spectrum Type          | standard                                                |
| Sweep Width (Hz)       | 8196.60                                                 |
| Temperature (degree C) | 22.713                                                  |

<sup>1</sup>H NMR (400MHz, DMSO-d<sub>6</sub>) δ =  
8.30 (t, *J*=1.8 Hz, 1H), 8.22 (td,  
*J*=1.3, 7.8 Hz, 1H), 7.91 - 7.87 (m,  
1H), 7.83 - 7.77 (m, 2H), 7.68 - 7.62  
(m, 1H), 7.51 (ddd, *J*=1.1, 7.1, 8.3  
Hz, 1H), 7.39 (ddd, *J*=1.1, 7.1, 8.2  
Hz, 1H), 4.12 (s, 3H)
