# Supplementary material for: Discovery of SARS-CoV-2 main protease inhibitors using a synthesis-directed de novo design model
Source: Royal Society of Chemistry journal article supplement (doi:10.1039/d1cc00050k), 2021-01-01
Supplement: d1cc00050k1.zip [file ALP-POS-ddb41b15-8_intermediate5.pdf › new_ESI/spectroscopic_data/compound5/ALP-POS-ddb41b15-8_intermediate5.pdf]

Compound ID: 00000000

EB2224-81-P1A DMSO Bruker\_NT-C\_400MHz

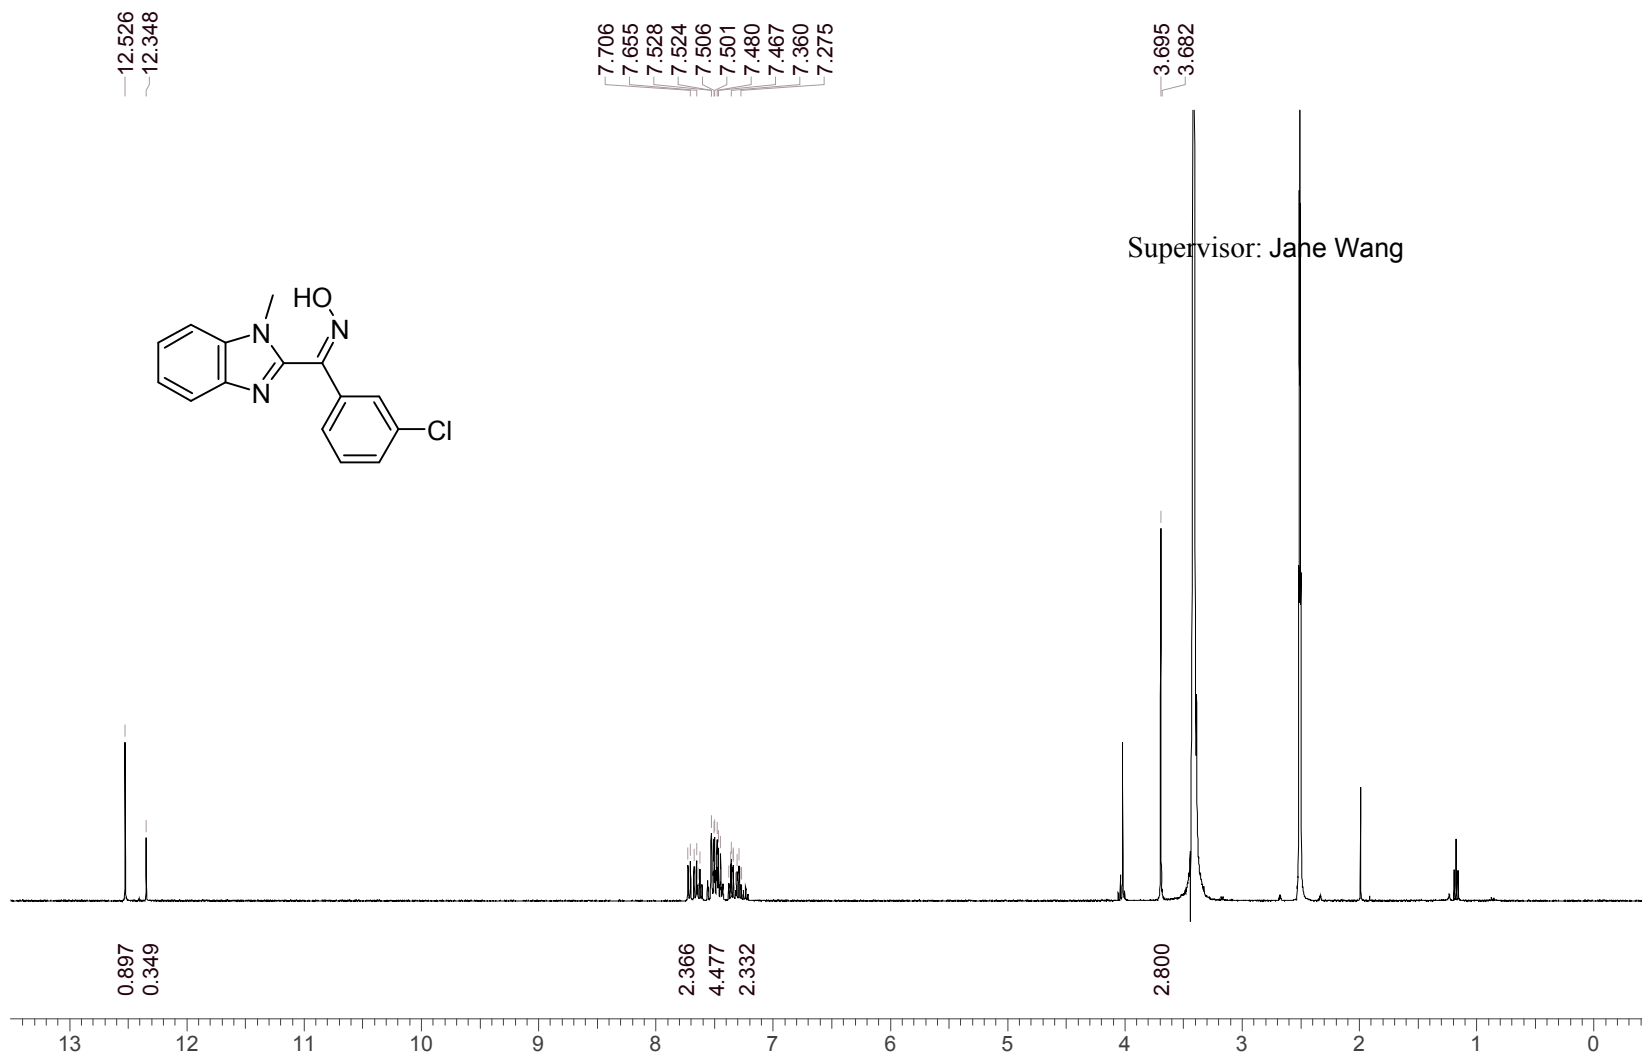

Acquisition Time (sec) 1.9999  
Comment EB2224-8  
1-P1A  
DMSO  
Bruker\_N  
T-C\_400M  
Hz  
Date 20 Aug  
2020  
06:54:43  
Frequency (MHz) 400.1400  
Nucleus 1H  
Number of Transients 8  
Origin Avance  
Original Points Count 16393  
Owner nmrsu  
Points Count 65536  
Pulse Sequence zg30  
Receiver Gain 101.00  
SW(cyclical) (Hz) 8196.72  
Solvent DMSO-d6  
Spectrum Offset (Hz) 2400.8411  
Spectrum Type standard  
Sweep Width (Hz) 8196.60  
Temperature (degree C) 22.642

Supervisor: Jane Wang

<sup>1</sup>H NMR (400MHz, DMSO-d<sub>6</sub>) δ =  
12.53 (s, 1H), 12.35 (s, 1H), 7.73 -  
7.62 (m, 2H), 7.53 - 7.44 (m, 4H),  
7.39 - 7.26 (m, 2H), 3.69 (s, 3H)

Confidential. For research only Not for regulatory filing

Operator:

Date:
