# Supplementary material for: Discovery of SARS-CoV-2 main protease inhibitors using a synthesis-directed de novo design model
Source: Royal Society of Chemistry journal article supplement (doi:10.1039/d1cc00050k), 2021-01-01
Supplement: d1cc00050k1.zip [file ALP-POS-ddb41b15-9_intermediate 5A.pdf › new_ESI/spectroscopic_data/compound4/ALP-POS-ddb41b15-9_intermediate 5A.pdf]

Compound ID: 00000000

EB2257-12-P1A MeOD Bruker\_NT-A\_400MHZ

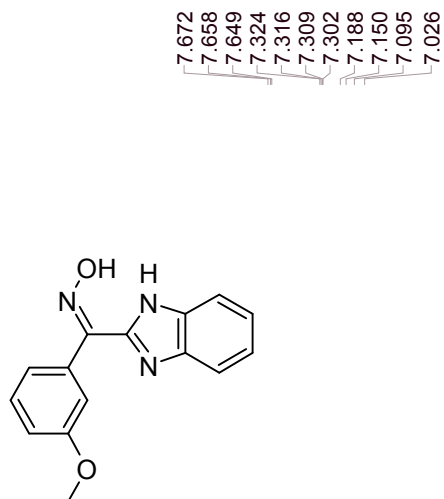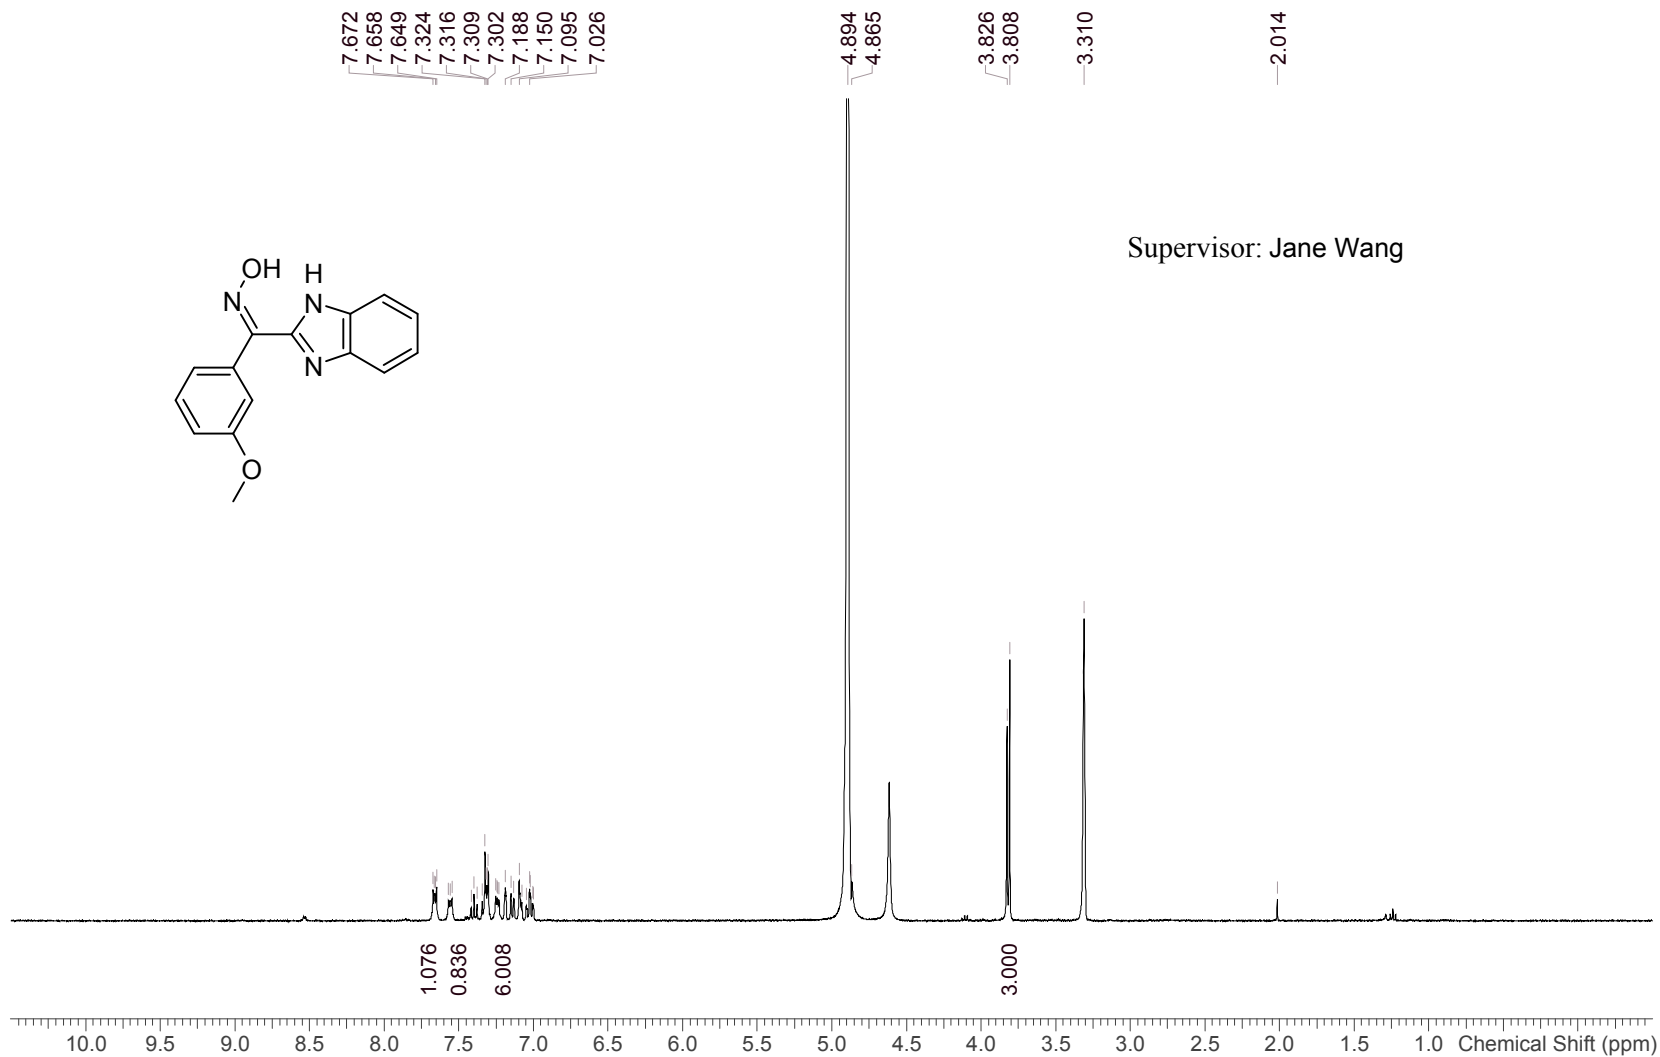

|                        |                                                         |
|------------------------|---------------------------------------------------------|
| Acquisition Time (sec) | 1.9999                                                  |
| Comment                | EB2257-1<br>2-P1A<br>MeOD<br>Bruker_N<br>T-A_400M<br>HZ |
| Date                   | 23 Jul<br>2020<br>05:11:32                              |
| Frequency (MHz)        | 400.1500                                                |
| Nucleus                | <sup>1</sup> H                                          |
| Number of Transients   | 8                                                       |
| Origin                 | Avance                                                  |
| Original Points Count  | 16393                                                   |
| Owner                  | nmrsu                                                   |
| Points Count           | 65536                                                   |
| Pulse Sequence         | zg30                                                    |
| Receiver Gain          | 101.00                                                  |
| SW(cyclical) (Hz)      | 8196.72                                                 |
| Solvent                | METHANOL-d <sub>4</sub>                                 |
| Spectrum Offset (Hz)   | 2463.7144                                               |
| Spectrum Type          | standard                                                |
| Sweep Width (Hz)       | 8196.60                                                 |
| Temperature (degree C) | -273.000                                                |

<sup>1</sup>H NMR (400MHz, METHANOL-d<sub>4</sub>) δ = 7.71 - 7.62 (m, 1H), 7.60 - 7.51 (m, 1H), 7.44 - 6.98 (m, 6H), 3.82 (d, *J*=7.3 Hz, 3H)
