# Supplementary material for: Discovery of SARS-CoV-2 main protease inhibitors using a synthesis-directed de novo design model
Source: Royal Society of Chemistry journal article supplement (doi:10.1039/d1cc00050k), 2021-01-01
Supplement: d1cc00050k1.zip [file ALP-POS-ddb41b15-9_intermediate4.pdf › new_ESI/spectroscopic_data/compound4/ALP-POS-ddb41b15-9_intermediate4.pdf]

Compound ID: 00000000

EB2257-9-P1A CDCl<sub>3</sub> Bruker\_NT-C\_400MHz

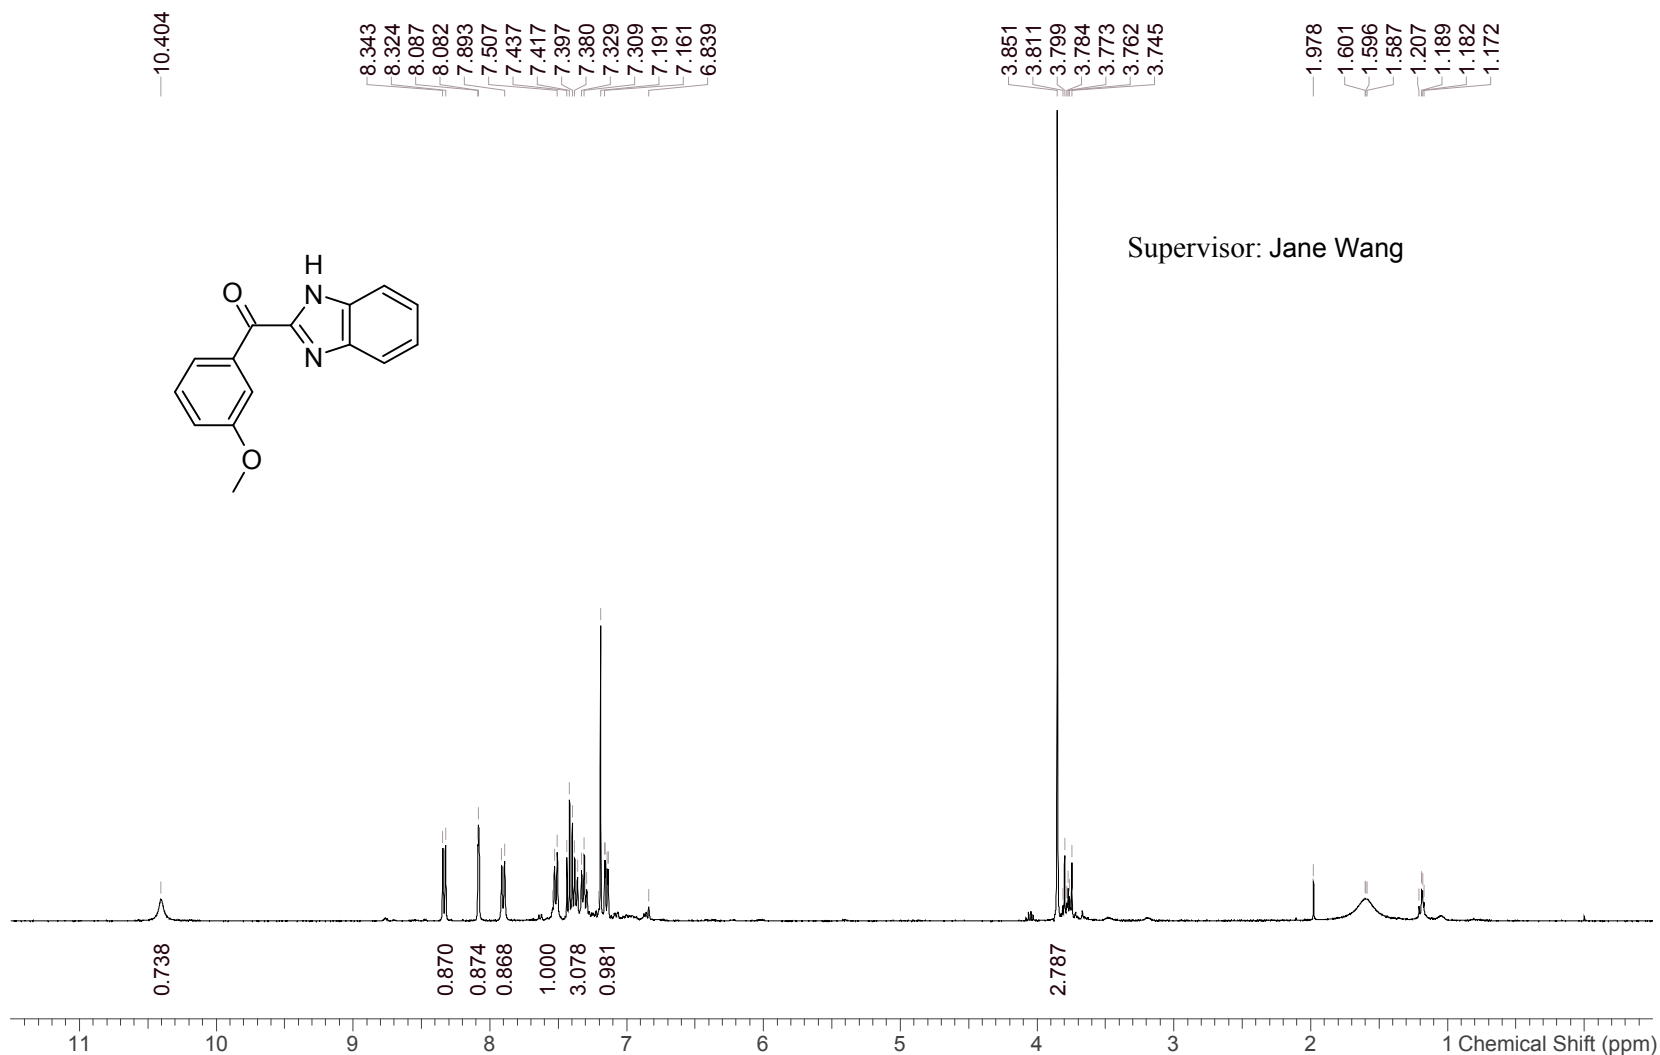

Supervisor: Jane Wang

|                        |                                                                 |
|------------------------|-----------------------------------------------------------------|
| Acquisition Time (sec) | 1.9999                                                          |
| Comment                | EB2257-9-P1A<br>CDCl <sub>3</sub><br>Bruker_N<br>T-C_400M<br>Hz |
| Date                   | 21 Jul 2020<br>10:19:40                                         |
| Frequency (MHz)        | 400.1400                                                        |
| Nucleus                | <sup>1</sup> H                                                  |
| Number of Transients   | 8                                                               |
| Origin                 | Avance                                                          |
| Original Points Count  | 16393                                                           |
| Owner                  | nmrsu                                                           |
| Points Count           | 65536                                                           |
| Pulse Sequence         | zg30                                                            |
| Receiver Gain          | 101.00                                                          |
| SW(cyclical) (Hz)      | 8196.72                                                         |
| Solvent                | CHLORO<br>FORM-d                                                |
| Spectrum Offset (Hz)   | 2363.5244                                                       |
| Spectrum Type          | standard                                                        |
| Sweep Width (Hz)       | 8196.60                                                         |
| Temperature (degree C) | 22.783                                                          |

<sup>1</sup>H NMR (400MHz, CHLOROFORM-d) δ = 10.40 (br s, 1H), 8.33 (d, *J*=7.8 Hz, 1H), 8.08 (d, *J*=1.9 Hz, 1H), 7.90 (d, *J*=8.1 Hz, 1H), 7.55 - 7.49 (m, 1H), 7.44 - 7.28 (m, 3H), 7.15 (dd, *J*=2.6, 8.3 Hz, 1H), 3.85 (s, 3H)

Confidential. For research only Not for regulatory filing

Operator:

Date:
